# Supplementary material
Source: publisher site journal article supplement (https://www.dovepress.com/article/517354)
Supplement: Supplementary file 1 [file 517354%20Revised%20supplement%20files.docx]

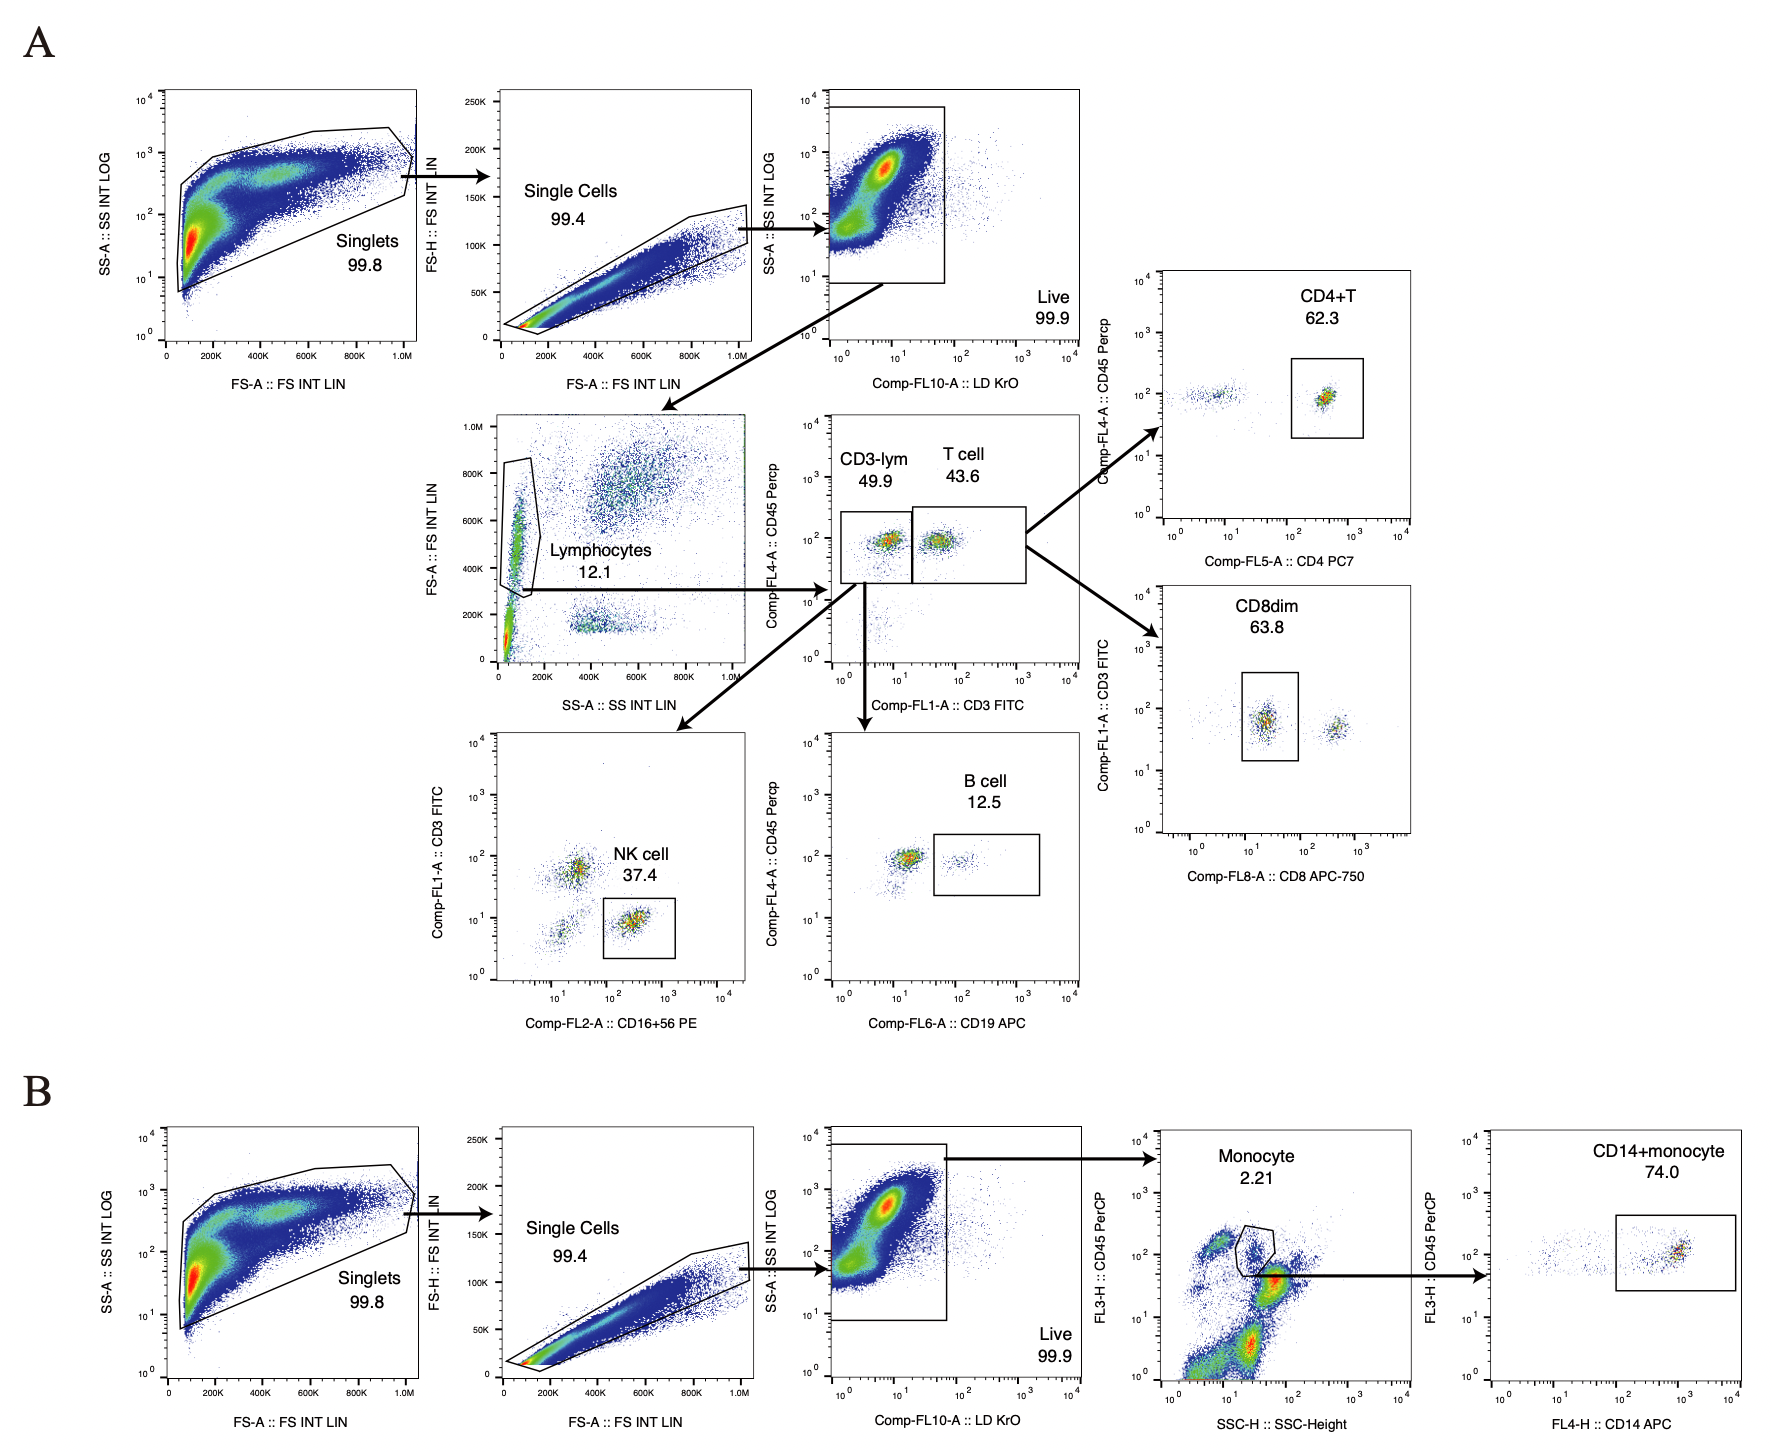


**Figure S1. Gating strategies for flow cytometry.**

(A)The strategy of gating B cell, T cell and NK cell subsets by flow cytometry.

(B) The strategy of gating Monocyte cells by flow cytometry.


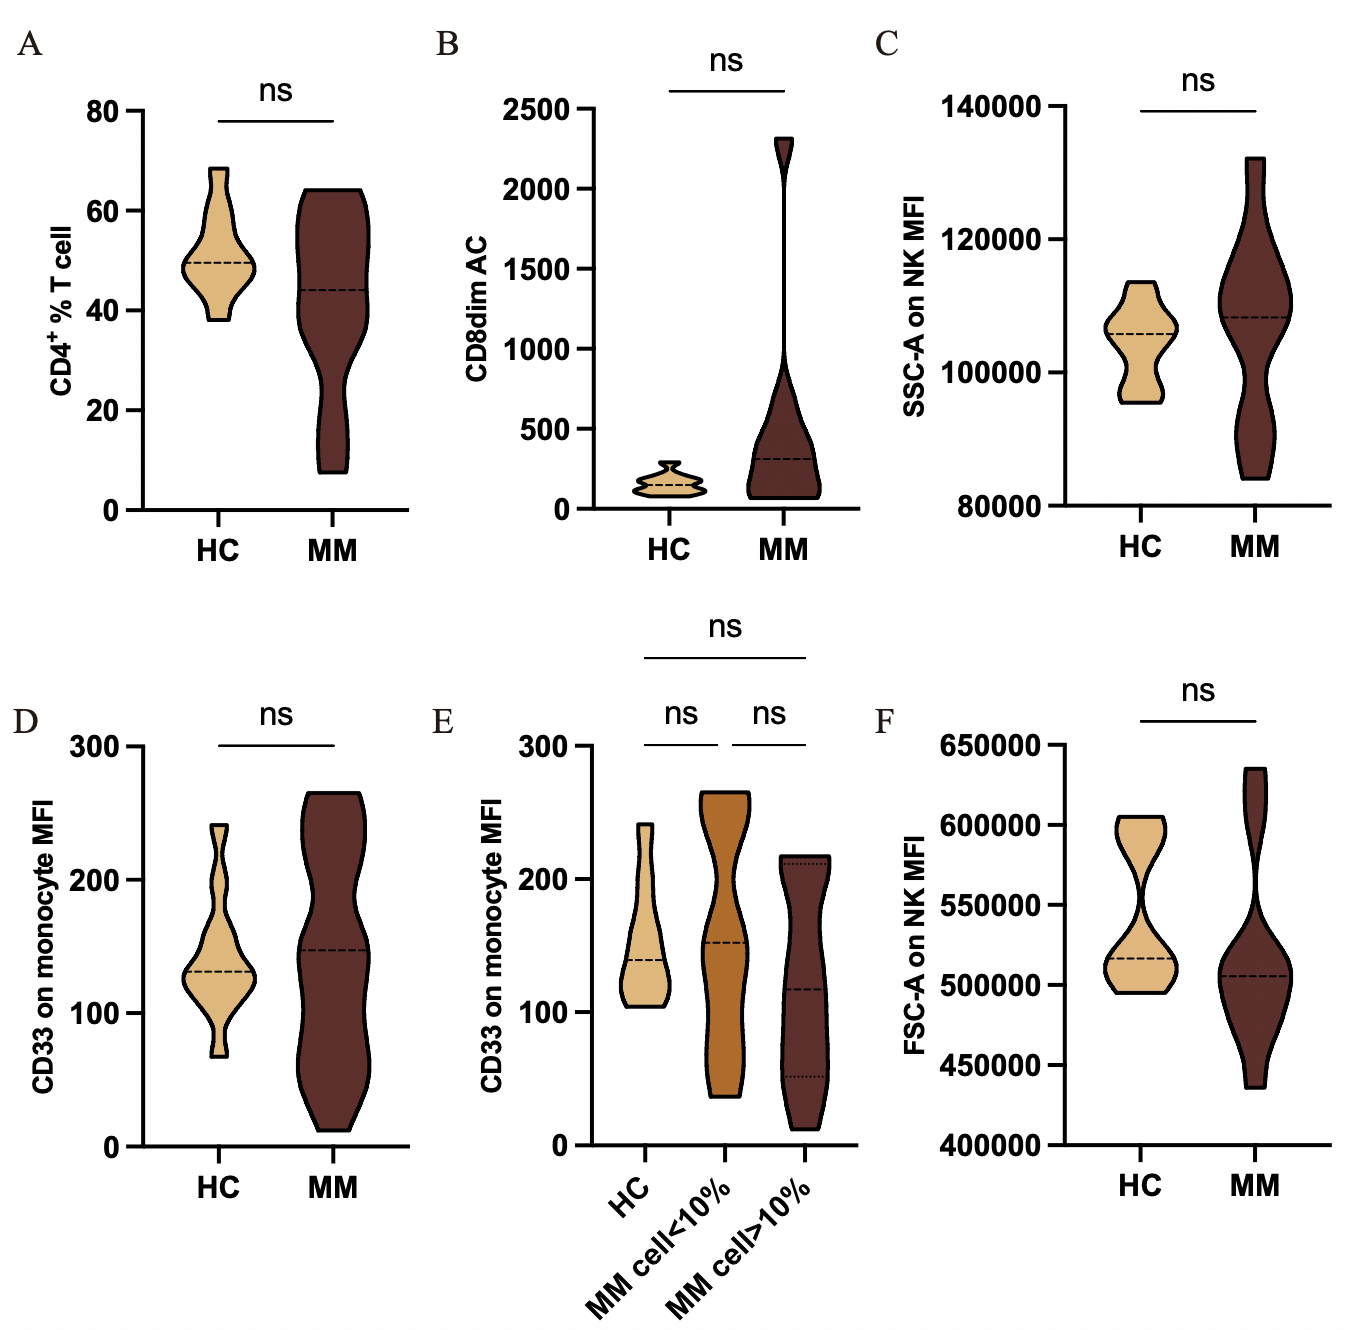


**Figure S2. Analyze the phenotypes of immune cells in HC and MM by flow cytometry.**

(A)Flow cytometry violin plots show the proportion of CD4+% in T cells from HC and MM patients.

(B)Flow cytometry analysis shows the absolute CD8dim count from HC and MM patients.

(C, D) Flow cytometry analysis shows the MFI expression of SSC-A on NK and CD33 on monocyte from HC and MM patients.

(E)Flow cytometry analysis shows the MFI expression of CD33 on monocyte from HC and MM patients with different tumor burden.

(F) Flow cytometry analysis shows the MFI expression of FSC-A on NK from HC and MM patients.

(ns: not significant).


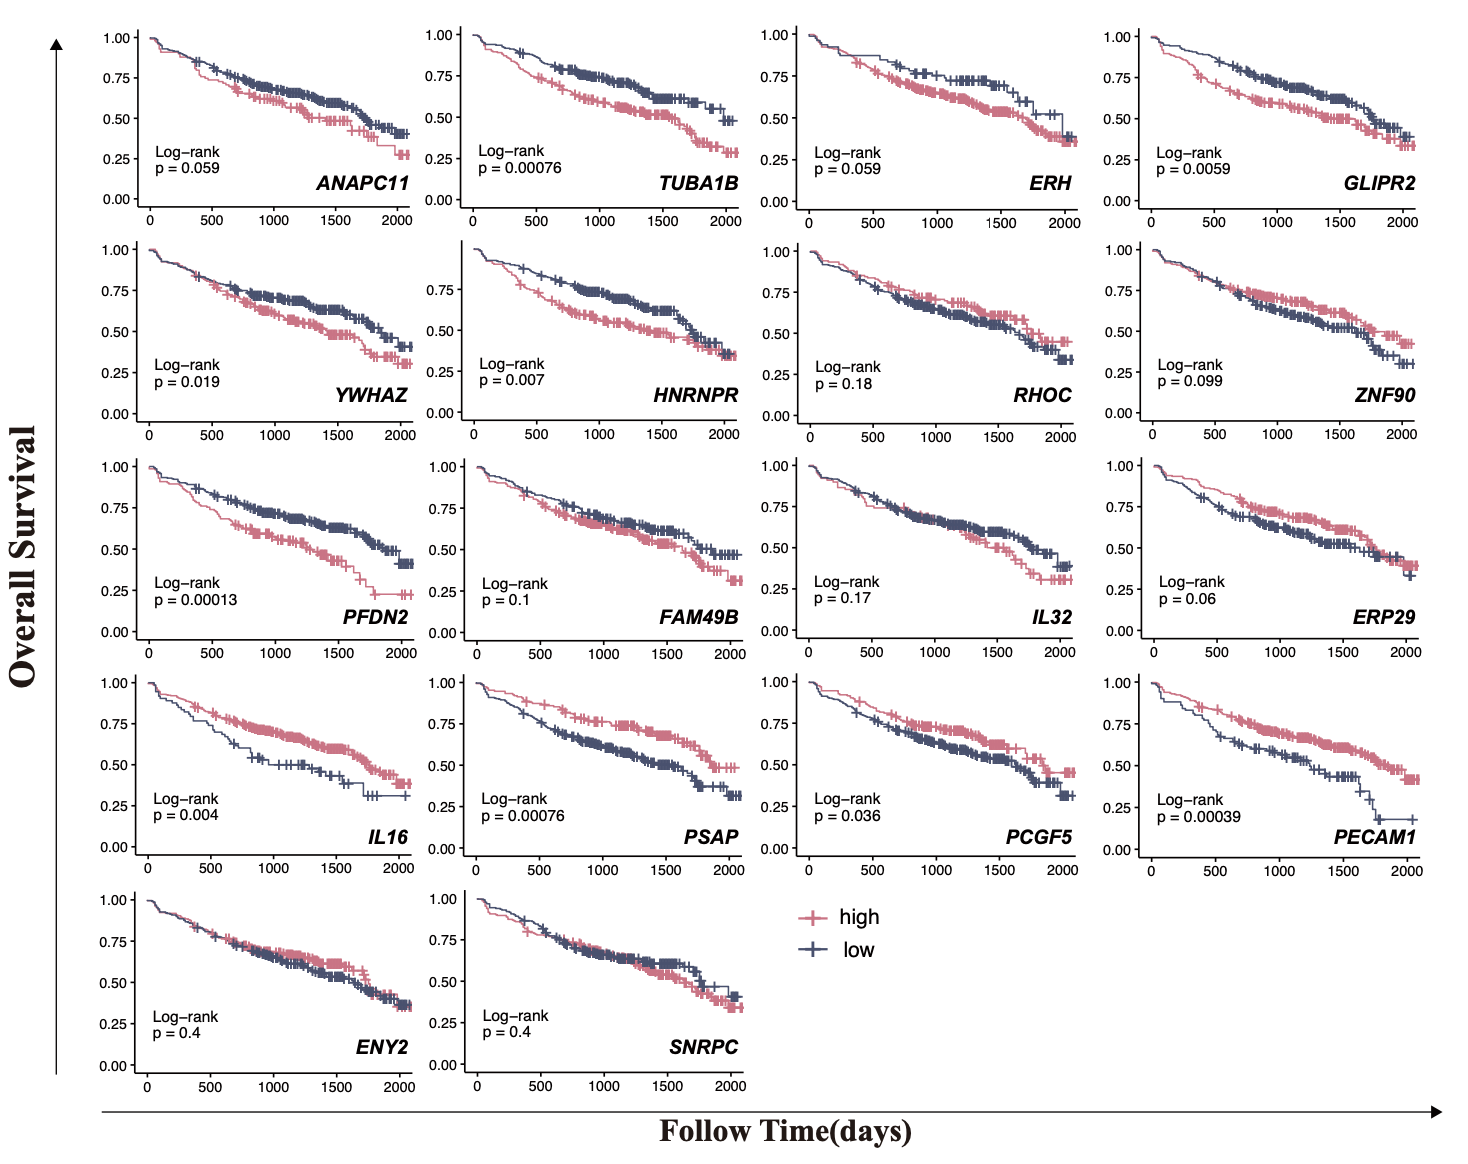


**Figure S3. Analysis of overall survival in MM patients (GSE136337) by each signature gene expression levels.**


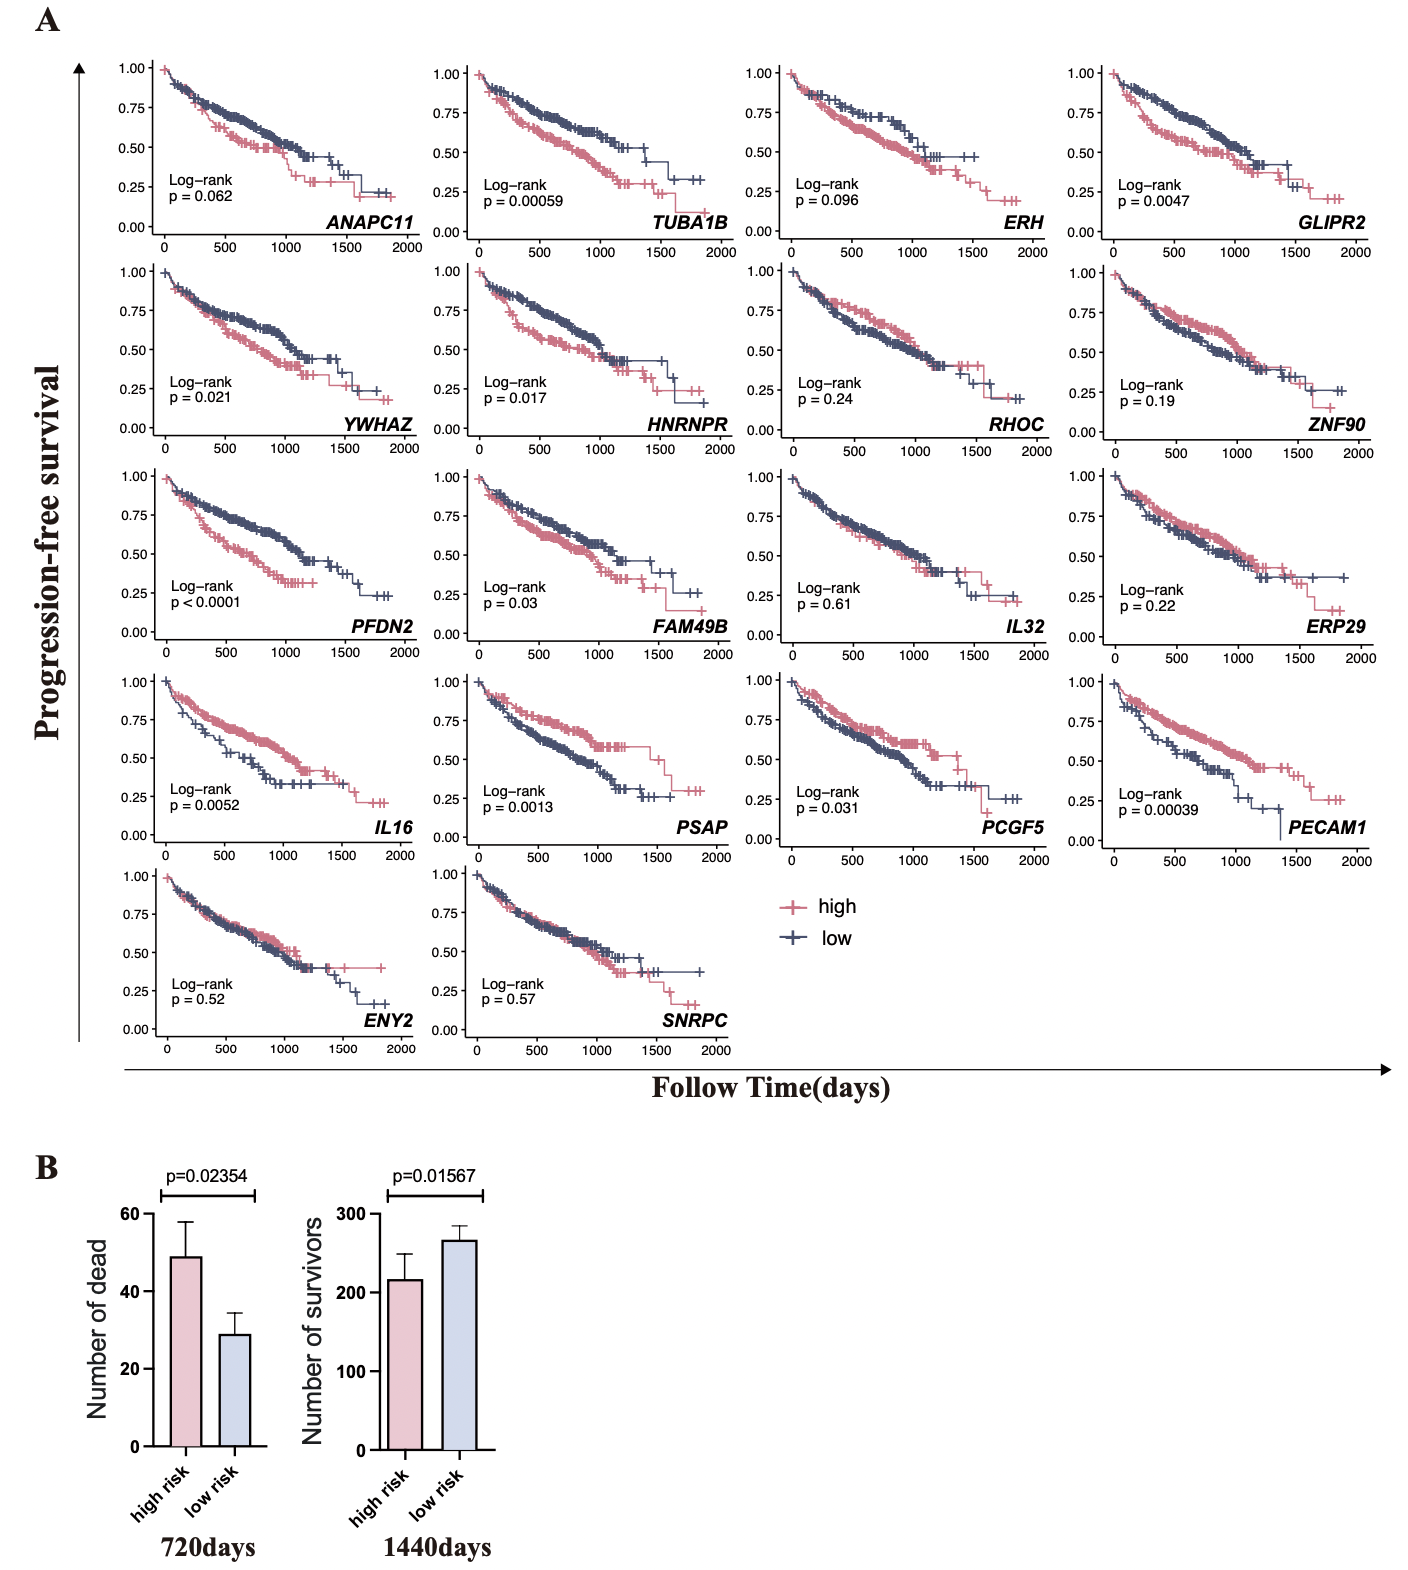


**Figure S4. Analyze the association between MGPS and the survival of MM patients.**

(A)Analysis of progression-free survival in MM patients (GSE136337) by each signature gene expression levels.

(B)The bar chart shows the number of deaths or survival in the high - and low-risk population at day 720 and day 1440 of survival follow-up for GSE24080 cohort.


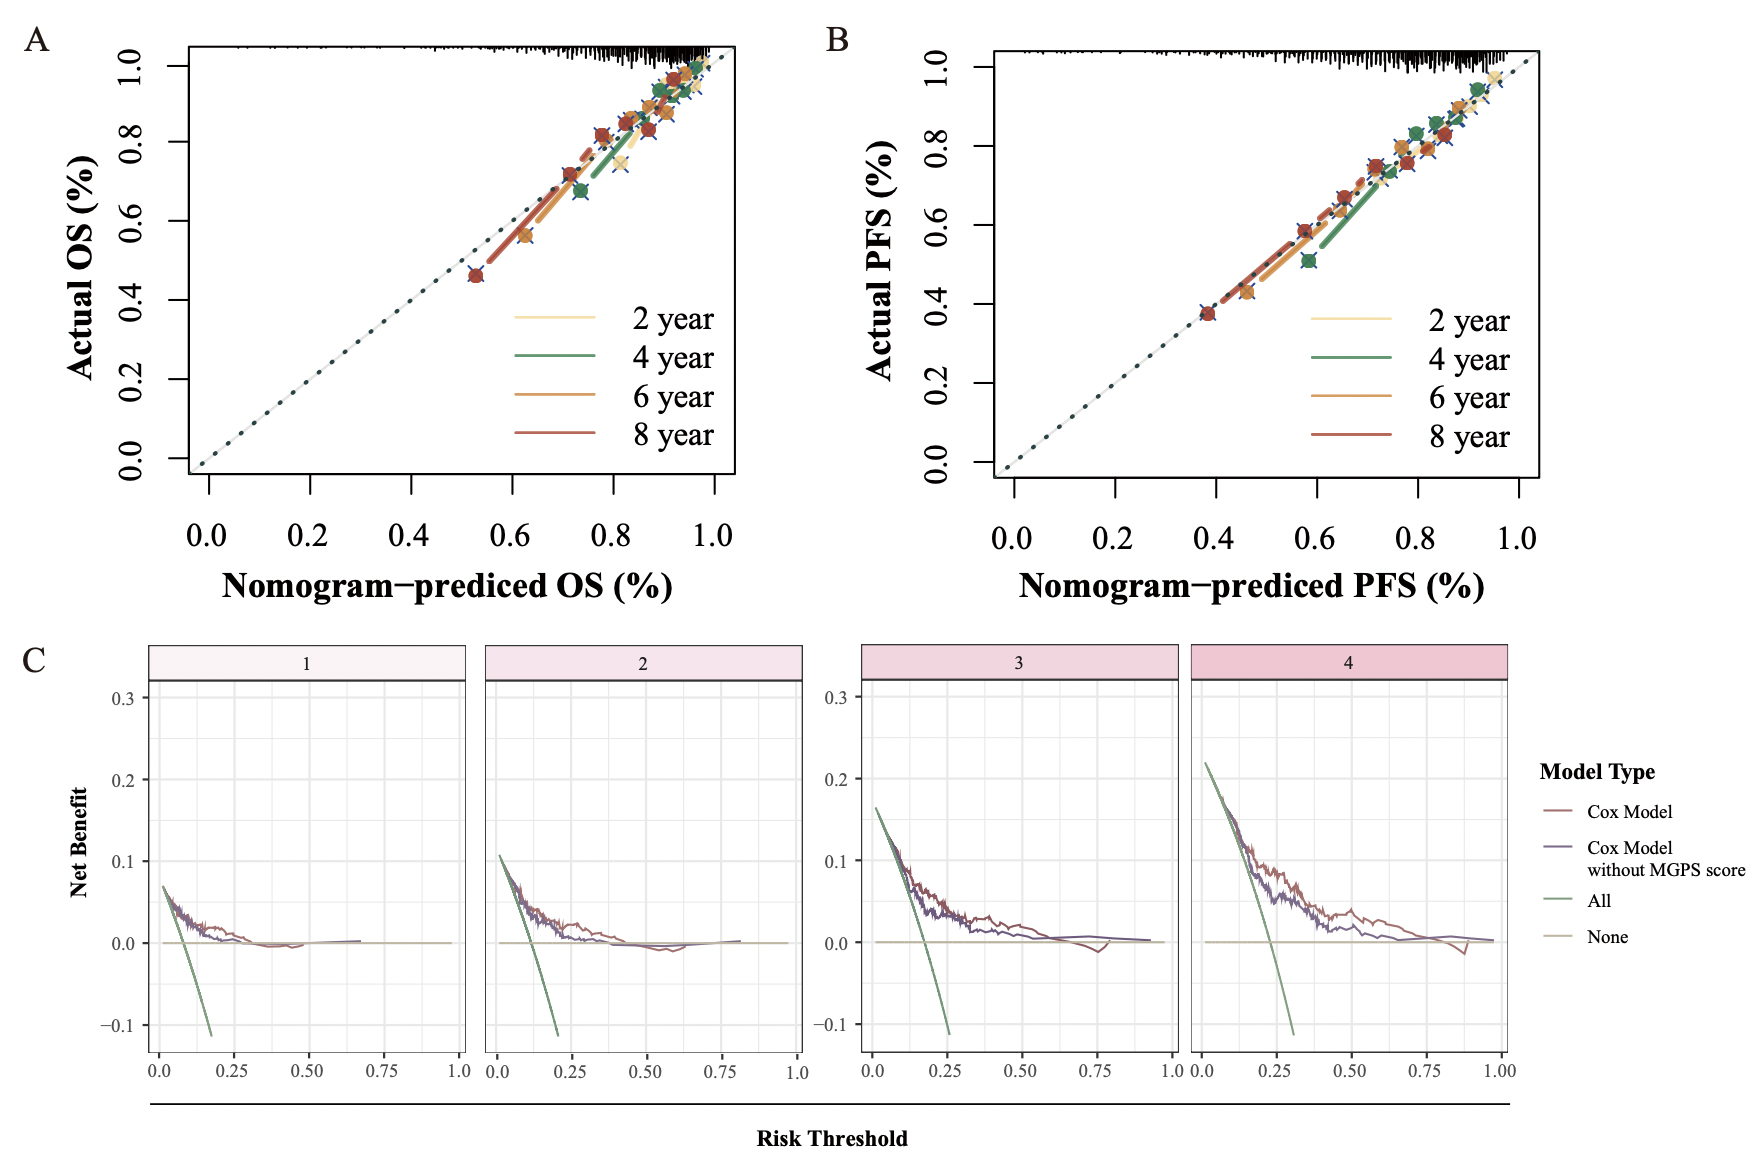


**Figure S5. The performance of MGPS was verified by calibration curves and DCA curves.**

Calibration plots showing the probability of 2-, 4-,6- and 8-year OS(A) and PFS(B) in GSE136337 cohort. (C)Decision curve analysis (DCA) of nomogram predicting 1-, 2-,3- and 4-year overall survival.


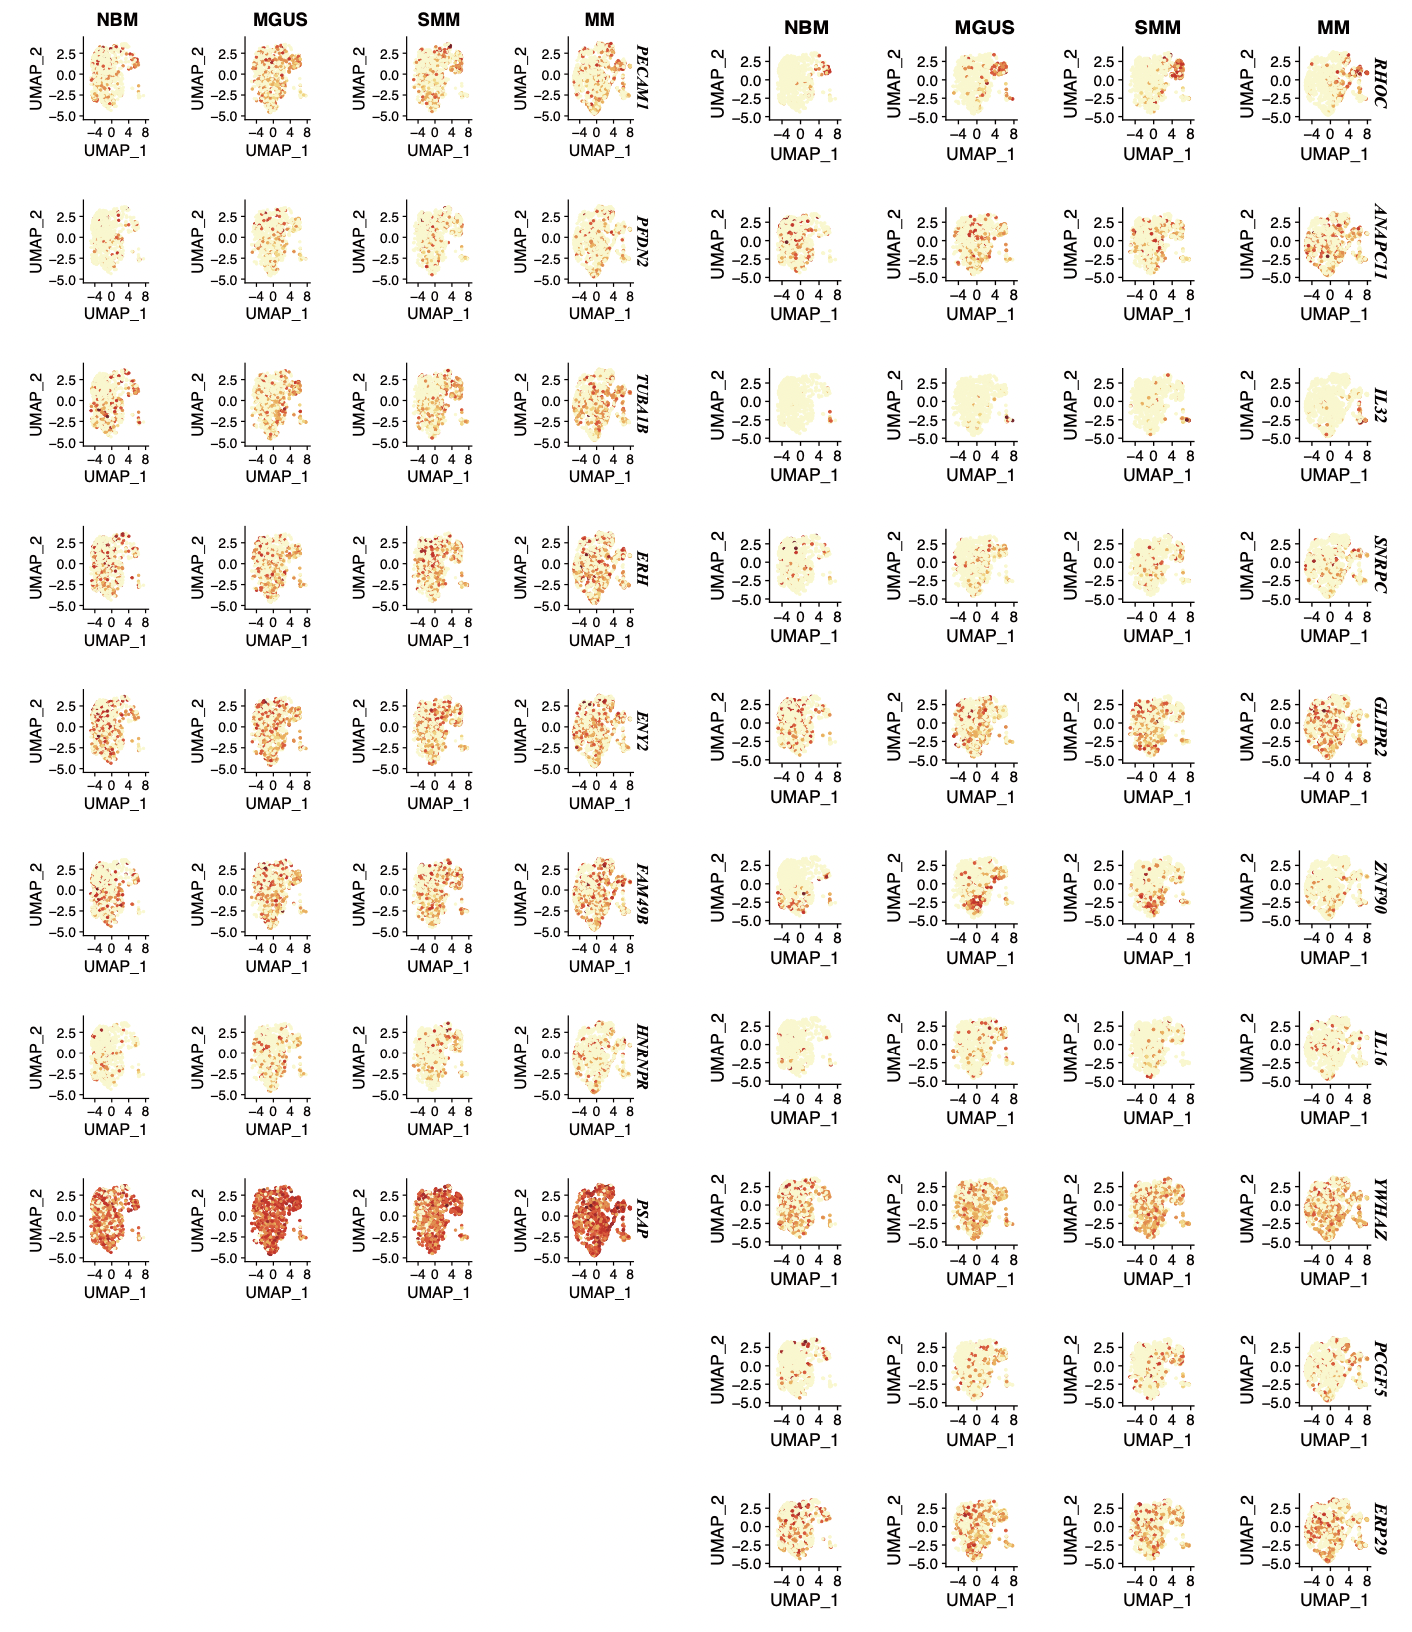


**Figure S6. Umap shows the expression distribution of model genes in monocytes for different samples.**

| **S1 Table.** Baseline characteristics of participants for Flow cytometry. | | | |
| --- | --- | --- | --- |
| **Patients and volunteers** | **Age** | **Gender** | **Plasma cell%** |
| MM1 | 79 | male | 35.8 |
| MM2 | 63 | female | 70.4 |
| MM3 | 52 | male | 134 |
| MM4 | 56 | female | 57.8 |
| MM5 | 71 | male | 130 |
| MM6 | 78 | female | 158 |
| MM7 | 60 | female | 27.6 |
| MM8 | 74 | male | 60.6 |
| MM9 | 71 | male | 109 |
| MM10 | 58 | female | 78.7 |
| MM11 | 61 | male | 77.9 |
| MM12 | 61 | male | 96.8 |
| MM13 | 61 | male | 163 |
| MM14 | 72 | female | 47.3 |
| MM15 | 66 | male | 79.3 |
| MM16 | 85 | male | 159 |
| MM17 | 64 | male | 116 |
| MM18 | 61 | male | 93.4 |
| MM19 | 62 | male | 18.5 |
| MM20 | 58 | female | 58.4 |
| MM21 | 67 | male | 29.3 |
| HC1 | 70 | male | 0 |
| HC2 | 59 | male | 0 |
| HC3 | 65 | male | 0 |
| HC4 | 53 | female | 0 |
| HC5 | 68 | male | 0 |
| HC6 | 67 | male | 0 |
| HC7 | 60 | male | 0 |
| HC8 | 59 | male | 0 |
| HC9 | 61 | female | 0 |
| HC10 | 21 | female | 0 |
| HC11 | 59 | male | 0 |

| **S2 Table.** Flow cytometric antibodies used in this study. | | |
| --- | --- | --- |
| **Antibodies** | **Source** | **Clone** |
| Anti-human-CD33-PE | eBioscience | HIM3-4 |
| Anti-human-CD45-PerCP | eBioscience | HI30 |
| Anti-human-HLA-DR-FITC | eBioscience | LN3 |
| Anti-human-CD14-APC | eBioscience | 61D3 |
| Anti-human-CD3-APC | eBioscience | UCHT1 |
| Anti-human-CD3-FITC | eBioscience | OKT3 |
| Anti-human-CD16-FITC | eBioscience | eBioCB16 |
| Anti-human-CD33-PE | eBioscience | HIM3-4 |
| Anti-human-CD56-PE | eBioscience | CMSSB |
| Anti-human-CD19-APC | eBioscience | eBio1D3 |
| Anti-human-CD8-APC-Alexa Fluor 750 | eBioscience | 3B5 |
| Anti-human-CD16-PE | eBioscience | B73.1 |
| Anti-human-CD4-PE-Cy7 | eBioscience | RPA-T4 |

| **S3 Table.** Characterization of immunophenotypes. | | | | |
| --- | --- | --- | --- | --- |
| **Trait type** | **Panel** | **Statistical trait name** | **Trait** | **GWAS Catalog Accession Number** |
| Relative count | B cell | BC_Trait1 | IgD+ %B cell | GCST90001391 |
| Absolute count | B cell | BC_Trait10 | IgD+ CD38br AC | GCST90001392 |
| Relative count | B cell | BC_Trait11 | IgD+ CD38dim %B cell | GCST90001393 |
| Absolute count | B cell | BC_Trait12 | IgD+ CD38dim AC | GCST90001394 |
| Relative count | B cell | BC_Trait13 | IgD+ CD38- %B cell | GCST90001395 |
| Absolute count | B cell | BC_Trait14 | IgD+ CD38- AC | GCST90001396 |
| Relative count | B cell | BC_Trait17 | Unsw mem %B cell | GCST90001397 |
| Absolute count | B cell | BC_Trait18 | Unsw mem AC | GCST90001398 |
| Relative count | B cell | BC_Trait19 | IgD- CD27- %B cell | GCST90001399 |
| Absolute count | B cell | BC_Trait2 | IgD+ AC | GCST90001400 |
| Absolute count | B cell | BC_Trait20 | IgD- CD27- AC | GCST90001401 |
| Relative count | B cell | BC_Trait21 | Sw mem %B cell | GCST90001402 |
| Absolute count | B cell | BC_Trait22 | Sw mem AC | GCST90001403 |
| Relative count | B cell | BC_Trait23 | PB/PC %B cell | GCST90001404 |
| Absolute count | B cell | BC_Trait24 | PB/PC AC | GCST90001405 |
| Relative count | B cell | BC_Trait25 | Memory B cell %B cell | GCST90001406 |
| Absolute count | B cell | BC_Trait26 | Memory B cell AC | GCST90001407 |
| Relative count | B cell | BC_Trait27 | Naive-mature B cell %B cell | GCST90001408 |
| Absolute count | B cell | BC_Trait28 | Naive-mature B cell AC | GCST90001409 |
| Relative count | B cell | BC_Trait3 | IgD- CD38br %B cell | GCST90001410 |
| Relative count | B cell | BC_Trait31 | IgD+ CD24+ %B cell | GCST90001411 |
| Absolute count | B cell | BC_Trait32 | IgD+ CD24+ AC | GCST90001412 |
| Relative count | B cell | BC_Trait33 | IgD- CD24- %B cell | GCST90001413 |
| Absolute count | B cell | BC_Trait34 | IgD- CD24- AC | GCST90001414 |
| Relative count | B cell | BC_Trait35 | IgD+ CD24- %B cell | GCST90001415 |
| Absolute count | B cell | BC_Trait36 | IgD+ CD24- AC | GCST90001416 |
| Relative count | B cell | BC_Trait37 | CD24+ CD27+ %B cell | GCST90001417 |
| Absolute count | B cell | BC_Trait38 | CD24+ CD27+ AC | GCST90001418 |
| Relative count | B cell | BC_Trait39 | CD20- %B cell | GCST90001419 |
| Absolute count | B cell | BC_Trait4 | IgD- CD38br AC | GCST90001420 |
| Absolute count | B cell | BC_Trait40 | CD20- AC | GCST90001421 |
| Relative count | B cell | BC_Trait43 | CD20- CD38- %B cell | GCST90001422 |
| Absolute count | B cell | BC_Trait44 | CD20- CD38- AC | GCST90001423 |
| Relative count | B cell | BC_Trait46 | IgD+ %Lymphocyte | GCST90001424 |
| Relative count | B cell | BC_Trait47 | IgD- CD38br %lymphocyte | GCST90001425 |
| Relative count | B cell | BC_Trait48 | IgD- CD38dim %lymphocyte | GCST90001426 |
| Relative count | B cell | BC_Trait49 | IgD- CD38- %lymphocyte | GCST90001427 |
| Relative count | B cell | BC_Trait5 | IgD- CD38dim %B cell | GCST90001428 |
| Relative count | B cell | BC_Trait50 | IgD+ CD38br %lymphocyte | GCST90001429 |
| Relative count | B cell | BC_Trait51 | IgD+ CD38dim %lymphocyte | GCST90001430 |
| Relative count | B cell | BC_Trait52 | IgD+ CD38- %lymphocyte | GCST90001431 |
| Relative count | B cell | BC_Trait54 | Unsw Mem %lymphocyte | GCST90001432 |
| Relative count | B cell | BC_Trait55 | IgD- CD27- %lymphocyte | GCST90001433 |
| Relative count | B cell | BC_Trait56 | Sw mem %lymphocyte | GCST90001434 |
| Relative count | B cell | BC_Trait57 | PB/PC %lymphocyte | GCST90001435 |
| Relative count | B cell | BC_Trait58 | Memory B cell %lymphocyte | GCST90001436 |
| Relative count | B cell | BC_Trait59 | Naive-mature B cell %lymphocyte | GCST90001437 |
| Absolute count | B cell | BC_Trait6 | IgD- CD38dim AC | GCST90001438 |
| Relative count | B cell | BC_Trait61 | IgD+ CD24+ %lymphocyte | GCST90001439 |
| Relative count | B cell | BC_Trait62 | IgD- CD24- %lymphocyte | GCST90001440 |
| Relative count | B cell | BC_Trait63 | IgD+ CD24- %lymphocyte | GCST90001441 |
| Relative count | B cell | BC_Trait64 | CD24+ CD27+ %lymphocyte | GCST90001442 |
| Relative count | B cell | BC_Trait65 | CD20- %lymphocyte | GCST90001443 |
| Relative count | B cell | BC_Trait67 | CD20- CD38- %lymphocyte | GCST90001444 |
| Relative count | B cell | BC_Trait7 | IgD- CD38- %B cell | GCST90001445 |
| Absolute count | B cell | BC_Trait8 | IgD- CD38- AC | GCST90001446 |
| Relative count | B cell | BC_Trait9 | IgD+ CD38br %B cell | GCST90001447 |
| Absolute count | cDC | DC_Trait524 | CD11c+ monocyte AC | GCST90001448 |
| Relative count | cDC | DC_Trait525 | CD11c+ monocyte %monocyte | GCST90001449 |
| Absolute count | cDC | DC_Trait526 | CD62L- monocyte AC | GCST90001450 |
| Relative count | cDC | DC_Trait527 | CD62L- monocyte %monocyte | GCST90001451 |
| Absolute count | cDC | DC_Trait530 | CD11c+ CD62L- monocyte AC | GCST90001452 |
| Relative count | cDC | DC_Trait531 | CD11c+ CD62L- monocyte %monocyte | GCST90001453 |
| Absolute count | cDC | DC_Trait532 | CD62L- HLA-DR++ monocyte AC | GCST90001454 |
| Relative count | cDC | DC_Trait533 | CD62L- HLA-DR++ monocyte %monocyte | GCST90001455 |
| Absolute count | cDC | DC_Trait534 | CD11c+ HLA-DR++ monocyte AC | GCST90001456 |
| Relative count | cDC | DC_Trait535 | CD11c+ HLA-DR++ monocyte %monocyte | GCST90001457 |
| Absolute count | cDC | f_DC_Trait502 | Myeloid DC AC | GCST90001458 |
| Relative count | cDC | f_DC_Trait503 | Myeloid DC %DC | GCST90001459 |
| Absolute count | cDC | f_DC_Trait504 | Plasmacytoid DC AC | GCST90001460 |
| Absolute count | cDC | f_DC_Trait505 | DC AC | GCST90001461 |
| Absolute count | cDC | f_DC_Trait508 | CD62L- DC AC | GCST90001462 |
| Relative count | cDC | f_DC_Trait509 | CD62L- DC %DC | GCST90001463 |
| Absolute count | cDC | f_DC_Trait512 | CD86+ myeloid DC AC | GCST90001464 |
| Relative count | cDC | f_DC_Trait513 | CD86+ myeloid DC %DC | GCST90001465 |
| Absolute count | cDC | f_DC_Trait514 | CD86+ plasmacytoid DC AC | GCST90001466 |
| Relative count | cDC | f_DC_Trait515 | CD86+ plasmacytoid DC %DC | GCST90001467 |
| Absolute count | cDC | f_DC_Trait516 | CD62L- myeloid DC AC | GCST90001468 |
| Relative count | cDC | f_DC_Trait517 | CD62L- myeloid DC %DC | GCST90001469 |
| Absolute count | cDC | f_DC_Trait518 | CD62L- plasmacytoid DC AC | GCST90001470 |
| Relative count | cDC | f_DC_Trait519 | CD62L- plasmacytoid DC %DC | GCST90001471 |
| Absolute count | cDC | f_DC_Trait520 | CD62L- CD86+ myeloid DC AC | GCST90001472 |
| Relative count | cDC | f_DC_Trait521 | CD62L- CD86+ myeloid DC %DC | GCST90001473 |
| Relative count | cDC | f_DC_Trait522 | Plasmacytoid DC %DC | GCST90001474 |
| Relative count | TBNK | f_MONO_Trait503 | HLA-DR++ monocyte %monocyte | GCST90001475 |
| Relative count | TBNK | f_MONO_Trait504 | HLA-DR++ monocyte %leukocyte | GCST90001476 |
| Absolute count | TBNK | f_MONO_Trait505 | HLA-DR++ monocyte AC | GCST90001477 |
| Relative count | Treg | f_Treg_Trait501 | CD4 Treg %CD4 | GCST90001478 |
| Relative count | Treg | f_Treg_Trait502 | CD4 Treg %T cell | GCST90001479 |
| Absolute count | Treg | f_Treg_Trait503 | Resting Treg AC | GCST90001480 |
| Relative count | Treg | f_Treg_Trait504 | Resting Treg % CD4 Treg | GCST90001481 |
| Relative count | Treg | f_Treg_Trait505 | Resting Treg %CD4 | GCST90001482 |
| Absolute count | Treg | f_Treg_Trait506 | CD39+ resting Treg AC | GCST90001483 |
| Relative count | Treg | f_Treg_Trait507 | CD39+ resting Treg %resting Treg | GCST90001484 |
| Relative count | Treg | f_Treg_Trait508 | CD39+ resting Treg % CD4 Treg | GCST90001485 |
| Absolute count | Treg | f_Treg_Trait509 | Activated Treg AC | GCST90001486 |
| Relative count | Treg | f_Treg_Trait510 | Activated Treg %CD4 Treg | GCST90001487 |
| Relative count | Treg | f_Treg_Trait511 | Activated Treg %CD4 | GCST90001488 |
| Absolute count | Treg | f_Treg_Trait512 | CD39+ activated Treg AC | GCST90001489 |
| Relative count | Treg | f_Treg_Trait513 | CD39+ activated Treg %activated Treg | GCST90001490 |
| Relative count | Treg | f_Treg_Trait514 | CD39+ activated Treg %CD4 Treg | GCST90001491 |
| Absolute count | Treg | f_Treg_Trait515 | Secreting Treg AC | GCST90001492 |
| Relative count | Treg | f_Treg_Trait516 | Secreting Treg % CD4 Treg | GCST90001493 |
| Relative count | Treg | f_Treg_Trait517 | Secreting Treg %CD4 | GCST90001494 |
| Absolute count | Treg | f_Treg_Trait518 | CD39+ secreting Treg AC | GCST90001495 |
| Relative count | Treg | f_Treg_Trait519 | CD39+ secreting Treg %secreting Treg | GCST90001496 |
| Relative count | Treg | f_Treg_Trait520 | CD39+ secreting Treg %CD4 Treg | GCST90001497 |
| Absolute count | Treg | f_Treg_Trait521 | Activated & resting Treg AC | GCST90001498 |
| Relative count | Treg | f_Treg_Trait522 | Activated & resting Treg % CD4 Treg | GCST90001499 |
| Relative count | Treg | f_Treg_Trait523 | Activated & resting Treg %CD4+ | GCST90001500 |
| Absolute count | Treg | f_Treg_Trait527 | Activated & secreting Treg AC | GCST90001501 |
| Relative count | Treg | f_Treg_Trait528 | Activated & secreting Treg %CD4 Treg | GCST90001502 |
| Relative count | Treg | f_Treg_Trait529 | Activated & secreting Treg %CD4+ | GCST90001503 |
| Absolute count | Treg | f_Treg_Trait533 | CD25hi AC | GCST90001504 |
| Relative count | Treg | f_Treg_Trait534 | CD25hi %CD4+ | GCST90001505 |
| Relative count | Treg | f_Treg_Trait535 | CD25hi %T cell | GCST90001506 |
| Absolute count | Treg | f_Treg_Trait536 | CD25hi CD45RA+ CD4 not Treg AC | GCST90001507 |
| Relative count | Treg | f_Treg_Trait537 | CD25hi CD45RA+ CD4 not Treg %CD4+ | GCST90001508 |
| Relative count | Treg | f_Treg_Trait538 | CD25hi CD45RA+ CD4 not Treg %T cell | GCST90001509 |
| Absolute count | Treg | f_Treg_Trait539 | CD25hi CD45RA- CD4 not Treg AC | GCST90001510 |
| Relative count | Treg | f_Treg_Trait540 | CD25hi CD45RA- CD4 not Treg %CD4+ | GCST90001511 |
| Relative count | Treg | f_Treg_Trait541 | CD25hi CD45RA- CD4 not Treg %T cell | GCST90001512 |
| Absolute count | Treg | f_Treg_Trait542 | CD4 Treg AC | GCST90001513 |
| Absolute count | Myeloid cell | MDSC_Trait1 | HSC AC | GCST90001514 |
| Absolute count | Myeloid cell | MDSC_Trait10 | Im MDSC AC | GCST90001515 |
| Relative count | Myeloid cell | MDSC_Trait11 | Im MDSC %CD33dim HLA-DR- CD66b- | GCST90001516 |
| Absolute count | Myeloid cell | MDSC_Trait12 | CD33br HLA-DR+ AC | GCST90001517 |
| Absolute count | Myeloid cell | MDSC_Trait13 | CD33br HLA-DR+ CD14- AC | GCST90001518 |
| Relative count | Myeloid cell | MDSC_Trait14 | CD33br HLA-DR+ CD14- %CD33br HLA-DR+ | GCST90001519 |
| Absolute count | Myeloid cell | MDSC_Trait15 | CD33br HLA-DR+ CD14dim AC | GCST90001520 |
| Relative count | Myeloid cell | MDSC_Trait16 | CD33br HLA-DR+ CD14dim %CD33br HLA-DR+ | GCST90001521 |
| Absolute count | Myeloid cell | MDSC_Trait22 | CD33- HLA-DR- AC | GCST90001522 |
| Absolute count | Myeloid cell | MDSC_Trait23 | CD33- HLA-DR+ AC | GCST90001523 |
| Absolute count | Myeloid cell | MDSC_Trait24 | Gr MDSC AC | GCST90001524 |
| Absolute count | Myeloid cell | MDSC_Trait25 | CD33dim HLA-DR+ CD11b+ AC | GCST90001525 |
| Relative count | Myeloid cell | MDSC_Trait26 | CD33dim HLA-DR+ CD11b+ %CD33dim HLA-DR+ | GCST90001526 |
| Absolute count | Myeloid cell | MDSC_Trait27 | CD33dim HLA-DR+ CD11b- AC | GCST90001527 |
| Relative count | Myeloid cell | MDSC_Trait28 | CD33dim HLA-DR+ CD11b- %CD33dim HLA-DR+ | GCST90001528 |
| Absolute count | Myeloid cell | MDSC_Trait3 | CD66b++ myeloid cell AC | GCST90001529 |
| Absolute count | Myeloid cell | MDSC_Trait4 | Mo MDSC AC | GCST90001530 |
| Absolute count | Myeloid cell | MDSC_Trait5 | CD33dim HLA-DR- AC | GCST90001531 |
| Absolute count | Myeloid cell | MDSC_Trait8 | Basophil AC | GCST90001532 |
| Relative count | Myeloid cell | MDSC_Trait9 | Basophil %CD33dim HLA-DR- CD66b- | GCST90001533 |
| Absolute count | Maturation stages of T cell | MT_ry_Trait514 | CD45RA- CD4+ AC | GCST90001534 |
| Relative count | Maturation stages of T cell | MT_ry_Trait515 | CD45RA- CD4+ %CD4+ | GCST90001535 |
| Relative count | Maturation stages of T cell | MT_ry_Trait516 | CD45RA- CD4+ %T cell | GCST90001536 |
| Absolute count | Maturation stages of T cell | MT_Trait503 | CM CD4+ AC | GCST90001537 |
| Relative count | Maturation stages of T cell | MT_Trait504 | CM CD4+ %CD4+ | GCST90001538 |
| Relative count | Maturation stages of T cell | MT_Trait505 | CM CD4+ %T cell | GCST90001539 |
| Absolute count | Maturation stages of T cell | MT_Trait506 | Naive CD4+ AC | GCST90001540 |
| Relative count | Maturation stages of T cell | MT_Trait507 | Naive CD4+ %CD4+ | GCST90001541 |
| Absolute count | Maturation stages of T cell | MT_Trait508 | EM CD4+ AC | GCST90001542 |
| Relative count | Maturation stages of T cell | MT_Trait509 | EM CD4+ %CD4+ | GCST90001543 |
| Relative count | Maturation stages of T cell | MT_Trait510 | EM CD4+ %T cell | GCST90001544 |
| Absolute count | Maturation stages of T cell | MT_Trait511 | TD CD4+ AC | GCST90001545 |
| Relative count | Maturation stages of T cell | MT_Trait512 | TD CD4+ %CD4+ | GCST90001546 |
| Relative count | Maturation stages of T cell | MT_Trait513 | TD CD4+ %T cell | GCST90001547 |
| Absolute count | Maturation stages of T cell | MT_Trait522 | CM CD8br AC | GCST90001548 |
| Relative count | Maturation stages of T cell | MT_Trait523 | CM CD8br %CD8br | GCST90001549 |
| Relative count | Maturation stages of T cell | MT_Trait524 | CM CD8br %T cell | GCST90001550 |
| Absolute count | Maturation stages of T cell | MT_Trait525 | Naive CD8br AC | GCST90001551 |
| Relative count | Maturation stages of T cell | MT_Trait526 | Naive CD8br %CD8br | GCST90001552 |
| Relative count | Maturation stages of T cell | MT_Trait527 | Naive CD8br %T cell | GCST90001553 |
| Absolute count | Maturation stages of T cell | MT_Trait528 | EM CD8br AC | GCST90001554 |
| Relative count | Maturation stages of T cell | MT_Trait529 | EM CD8br %CD8br | GCST90001555 |
| Relative count | Maturation stages of T cell | MT_Trait530 | EM CD8br %T cell | GCST90001556 |
| Absolute count | Maturation stages of T cell | MT_Trait531 | TD CD8br AC | GCST90001557 |
| Relative count | Maturation stages of T cell | MT_Trait532 | TD CD8br %CD8br | GCST90001558 |
| Relative count | Maturation stages of T cell | MT_Trait533 | TD CD8br %T cell | GCST90001559 |
| Absolute count | Maturation stages of T cell | MT_Trait537 | CD45RA+ CD8br AC | GCST90001560 |
| Relative count | Maturation stages of T cell | MT_Trait538 | CD45RA+ CD8br %CD8br | GCST90001561 |
| Relative count | Maturation stages of T cell | MT_Trait539 | CD45RA+ CD8br %T cell | GCST90001562 |
| Absolute count | Maturation stages of T cell | MT_Trait542 | CM DN (CD4-CD8-) AC | GCST90001563 |
| Relative count | Maturation stages of T cell | MT_Trait543 | CM DN (CD4-CD8-) %DN | GCST90001564 |
| Relative count | Maturation stages of T cell | MT_Trait544 | CM DN (CD4-CD8-) %T cell | GCST90001565 |
| Absolute count | Maturation stages of T cell | MT_Trait545 | Naive DN (CD4-CD8-) AC | GCST90001566 |
| Relative count | Maturation stages of T cell | MT_Trait546 | Naive DN (CD4-CD8-) %DN | GCST90001567 |
| Relative count | Maturation stages of T cell | MT_Trait547 | Naive DN (CD4-CD8-) %T cell | GCST90001568 |
| Absolute count | Maturation stages of T cell | MT_Trait548 | EM DN (CD4-CD8-) AC | GCST90001569 |
| Relative count | Maturation stages of T cell | MT_Trait549 | EM DN (CD4-CD8-) %DN | GCST90001570 |
| Relative count | Maturation stages of T cell | MT_Trait550 | EM DN (CD4-CD8-) %T cell | GCST90001571 |
| Absolute count | Maturation stages of T cell | MT_Trait551 | TD DN (CD4-CD8-) AC | GCST90001572 |
| Relative count | Maturation stages of T cell | MT_Trait552 | TD DN (CD4-CD8-) %DN | GCST90001573 |
| Relative count | Maturation stages of T cell | MT_Trait553 | TD DN (CD4-CD8-) %T cell | GCST90001574 |
| Relative count | Maturation stages of T cell | MT_Trait560 | Naive CD4+ %T cell | GCST90001575 |
| Relative count | B cell | N_BC_Trait3 | Transitional %B cell | GCST90001576 |
| Absolute count | B cell | N_BC_Trait4 | Transitional AC | GCST90001577 |
| Relative count | B cell | N_BC_Trait6 | Transitional %lymphocyte | GCST90001578 |
| Absolute count | Monocyte | N_MONO_Trait501 | CD14- CD16+ monocyte AC | GCST90001579 |
| Absolute count | Monocyte | N_MONO_Trait503 | CD14+ CD16+ monocyte AC | GCST90001580 |
| Absolute count | Monocyte | N_MONO_Trait505 | CD14- CD16- AC | GCST90001581 |
| Absolute count | Monocyte | N_MONO_Trait507 | CD14+ CD16- monocyte AC | GCST90001582 |
| Absolute count | Monocyte | N_MONO_Trait513 | Monocyte AC | GCST90001583 |
| Relative count | Monocyte | N_MONO_Trait514 | CD14- CD16+ monocyte %monocyte | GCST90001584 |
| Relative count | Monocyte | N_MONO_Trait515 | CD14+ CD16+ monocyte %monocyte | GCST90001585 |
| Relative count | Monocyte | N_MONO_Trait516 | CD14+ CD16- monocyte %monocyte | GCST90001586 |
| Relative count | Monocyte | N_MONO_Trait517 | CD16+ monocyte %monocyte | GCST90001587 |
| Relative count | TBNK | RATIO_CD3_B | T/B | GCST90001588 |
| Relative count | TBNK | RATIO_CD4_CD8B | CD4/CD8br | GCST90001589 |
| Absolute count | TBNK | TB_ry_Trait512 | CD4+ AC | GCST90001590 |
| Relative count | TBNK | TB_ry_Trait513 | CD4+ %T cell | GCST90001591 |
| Absolute count | TBNK | TB_ry_Trait515 | CD8br AC | GCST90001592 |
| Relative count | TBNK | TB_ry_Trait516 | CD8br %T cell | GCST90001593 |
| Absolute count | TBNK | TB_ry_Trait518 | DP (CD4+CD8+) AC | GCST90001594 |
| Relative count | TBNK | TB_ry_Trait519 | DP (CD4+CD8+) %T cell | GCST90001595 |
| Absolute count | TBNK | TB_ry_Trait524 | CD8dim AC | GCST90001596 |
| Relative count | TBNK | TB_ry_Trait525 | CD8dim %T cell | GCST90001597 |
| Absolute count | TBNK | TB_ry_Trait527 | DN (CD4-CD8-) AC | GCST90001598 |
| Relative count | TBNK | TB_ry_Trait528 | DN (CD4-CD8-) %T cell | GCST90001599 |
| Absolute count | TBNK | TB_Trait501 | Leukocyte AC | GCST90001600 |
| Absolute count | TBNK | TB_Trait507 | Lymphocyte AC | GCST90001601 |
| Relative count | TBNK | TB_Trait508 | Lymphocyte %leukocyte | GCST90001602 |
| Absolute count | TBNK | TB_Trait509 | T cell AC | GCST90001603 |
| Relative count | TBNK | TB_Trait510 | T cell %lymphocyte | GCST90001604 |
| Relative count | TBNK | TB_Trait511 | T cell %leukocyte | GCST90001605 |
| Relative count | TBNK | TB_Trait514 | CD4+ %leukocyte | GCST90001606 |
| Relative count | TBNK | TB_Trait517 | CD8br %leukocyte | GCST90001607 |
| Relative count | TBNK | TB_Trait520 | DP (CD4+CD8+) %leukocyte | GCST90001608 |
| Absolute count | TBNK | TB_Trait521 | CD4+ CD8dim AC | GCST90001609 |
| Relative count | TBNK | TB_Trait522 | CD4+ CD8dim %lymphocyte | GCST90001610 |
| Relative count | TBNK | TB_Trait523 | CD4+ CD8dim %leukocyte | GCST90001611 |
| Relative count | TBNK | TB_Trait526 | CD8dim %leukocyte | GCST90001612 |
| Relative count | TBNK | TB_Trait529 | DN (CD4-CD8-) %leukocyte | GCST90001613 |
| Relative count | TBNK | TB_Trait532 | CD8br and CD8dim %leukocyte | GCST90001614 |
| Absolute count | TBNK | TB_Trait533 | TCRgd AC | GCST90001615 |
| Relative count | TBNK | TB_Trait534 | TCRgd %T cell | GCST90001616 |
| Relative count | TBNK | TB_Trait535 | TCRgd %lymphocyte | GCST90001617 |
| Absolute count | TBNK | TB_Trait536 | HLA-DR+ T cell AC | GCST90001618 |
| Relative count | TBNK | TB_Trait537 | HLA-DR+ T cell%T cell | GCST90001619 |
| Relative count | TBNK | TB_Trait538 | HLA-DR+ T cell%lymphocyte | GCST90001620 |
| Absolute count | TBNK | TB_Trait539 | NKT AC | GCST90001621 |
| Relative count | TBNK | TB_Trait540 | NKT %T cell | GCST90001622 |
| Relative count | TBNK | TB_Trait541 | NKT %lymphocyte | GCST90001623 |
| Absolute count | TBNK | TB_Trait542 | HLA-DR+ CD4+ AC | GCST90001624 |
| Relative count | TBNK | TB_Trait543 | HLA-DR+ CD4+ %T cell | GCST90001625 |
| Relative count | TBNK | TB_Trait544 | HLA-DR+ CD4+ %lymphocyte | GCST90001626 |
| Absolute count | TBNK | TB_Trait545 | HLA-DR+ CD8br AC | GCST90001627 |
| Relative count | TBNK | TB_Trait546 | HLA-DR+ CD8br %T cell | GCST90001628 |
| Relative count | TBNK | TB_Trait547 | HLA-DR+ CD8br %lymphocyte | GCST90001629 |
| Absolute count | TBNK | TB_Trait548 | CD8br NKT AC | GCST90001630 |
| Relative count | TBNK | TB_Trait549 | CD8br NKT %T cell | GCST90001631 |
| Relative count | TBNK | TB_Trait550 | CD8br NKT %lymphocyte | GCST90001632 |
| Absolute count | TBNK | TB_Trait551 | CD8dim NKT AC | GCST90001633 |
| Relative count | TBNK | TB_Trait552 | CD8dim NKT %T cell | GCST90001634 |
| Relative count | TBNK | TB_Trait553 | CD8dim NKT %lymphocyte | GCST90001635 |
| Absolute count | TBNK | TB_Trait554 | DN (CD4-CD8-) NKT AC | GCST90001636 |
| Relative count | TBNK | TB_Trait555 | DN (CD4-CD8-) NKT %T cell | GCST90001637 |
| Relative count | TBNK | TB_Trait556 | DN (CD4-CD8-) NKT %lymphocyte | GCST90001638 |
| Absolute count | TBNK | TB_Trait560 | CD3- lymphocyte AC | GCST90001639 |
| Relative count | TBNK | TB_Trait561 | CD3- lymphocyte %lymphocyte | GCST90001640 |
| Relative count | TBNK | TB_Trait562 | CD3- lymphocyte %leukocyte | GCST90001641 |
| Absolute count | TBNK | TB_Trait563 | B cell AC | GCST90001642 |
| Relative count | TBNK | TB_Trait564 | B cell % CD3- lymphocyte | GCST90001643 |
| Relative count | TBNK | TB_Trait565 | B cell %lymphocyte | GCST90001644 |
| Absolute count | TBNK | TB_Trait566 | NK AC | GCST90001645 |
| Relative count | TBNK | TB_Trait567 | NK %CD3- lymphocyte | GCST90001646 |
| Relative count | TBNK | TB_Trait568 | NK %lymphocyte | GCST90001647 |
| Absolute count | TBNK | TB_Trait569 | HLA-DR+ NK AC | GCST90001648 |
| Relative count | TBNK | TB_Trait570 | HLA-DR+ NK %NK | GCST90001649 |
| Relative count | TBNK | TB_Trait571 | HLA-DR+ NK %CD3- lymphocyte | GCST90001650 |
| Absolute count | TBNK | TB_Trait575 | Granulocyte AC | GCST90001651 |
| Relative count | TBNK | TB_Trait576 | Granulocyte %leukocyte | GCST90001652 |
| Relative count | Treg | Treg_Trait505 | CD28- DN (CD4-CD8-) %DN | GCST90001653 |
| Absolute count | Treg | Treg_Trait506 | CD28- DN (CD4-CD8-) AC | GCST90001654 |
| Relative count | Treg | Treg_Trait507 | CD28+ DN (CD4-CD8-) %T cell | GCST90001655 |
| Relative count | Treg | Treg_Trait508 | CD28+ DN (CD4-CD8-) %DN | GCST90001656 |
| Absolute count | Treg | Treg_Trait509 | CD28+ DN (CD4-CD8-) AC | GCST90001657 |
| Relative count | Treg | Treg_Trait512 | CD39+ CD4+ %T cell | GCST90001658 |
| Relative count | Treg | Treg_Trait513 | CD39+ CD4+ %CD4+ | GCST90001659 |
| Absolute count | Treg | Treg_Trait514 | CD39+ CD4+ AC | GCST90001660 |
| Relative count | Treg | Treg_Trait574 | CD28- CD8dim %T cell | GCST90001661 |
| Relative count | Treg | Treg_Trait575 | CD28- CD8dim %CD8dim | GCST90001662 |
| Absolute count | Treg | Treg_Trait576 | CD28- CD8dim AC | GCST90001663 |
| Relative count | Treg | Treg_Trait577 | CD28+ CD45RA+ CD8dim %T cell | GCST90001664 |
| Relative count | Treg | Treg_Trait578 | CD28+ CD45RA+ CD8dim %CD8dim | GCST90001665 |
| Absolute count | Treg | Treg_Trait579 | CD28+ CD45RA+ CD8dim AC | GCST90001666 |
| Relative count | Treg | Treg_Trait580 | CD28+ CD45RA- CD8dim %T cell | GCST90001667 |
| Relative count | Treg | Treg_Trait581 | CD28+ CD45RA- CD8dim %CD8dim | GCST90001668 |
| Absolute count | Treg | Treg_Trait582 | CD28+ CD45RA- CD8dim AC | GCST90001669 |
| Relative count | Treg | Treg_Trait585 | CD39+ CD8br %T cell | GCST90001670 |
| Relative count | Treg | Treg_Trait586 | CD39+ CD8br %CD8br | GCST90001671 |
| Absolute count | Treg | Treg_Trait587 | CD39+ CD8br AC | GCST90001672 |
| Relative count | Treg | Treg_Trait588 | CD28- CD127- CD25++ CD8br %T cell | GCST90001673 |
| Relative count | Treg | Treg_Trait589 | CD28- CD127- CD25++ CD8br %CD8br | GCST90001674 |
| Absolute count | Treg | Treg_Trait590 | CD28- CD127- CD25++ CD8br AC | GCST90001675 |
| Relative count | Treg | Treg_Trait591 | CD28- CD25++ CD8br %T cell | GCST90001676 |
| Relative count | Treg | Treg_Trait592 | CD28- CD25++ CD8br %CD8br | GCST90001677 |
| Absolute count | Treg | Treg_Trait593 | CD28- CD25++ CD8br AC | GCST90001678 |
| Relative count | Treg | Treg_Trait594 | CD25++ CD8br %T cell | GCST90001679 |
| Relative count | Treg | Treg_Trait595 | CD25++ CD8br %CD8br | GCST90001680 |
| Absolute count | Treg | Treg_Trait596 | CD25++ CD8br AC | GCST90001681 |
| Relative count | Treg | Treg_Trait597 | CD127- CD8br %T cell | GCST90001682 |
| Relative count | Treg | Treg_Trait598 | CD127- CD8br %CD8br | GCST90001683 |
| Absolute count | Treg | Treg_Trait599 | CD127- CD8br AC | GCST90001684 |
| Relative count | Treg | Treg_Trait600 | CD28- CD8br %T cell | GCST90001685 |
| Relative count | Treg | Treg_Trait601 | CD28- CD8br %CD8br | GCST90001686 |
| Absolute count | Treg | Treg_Trait602 | CD28- CD8br AC | GCST90001687 |
| Relative count | Treg | Treg_Trait603 | CD28+ CD45RA+ CD8br %T cell | GCST90001688 |
| Relative count | Treg | Treg_Trait604 | CD28+ CD45RA+ CD8br %CD8br | GCST90001689 |
| Absolute count | Treg | Treg_Trait605 | CD28+ CD45RA+ CD8br AC | GCST90001690 |
| Relative count | Treg | Treg_Trait606 | CD28+ CD45RA- CD8br %T cell | GCST90001691 |
| Relative count | Treg | Treg_Trait607 | CD28+ CD45RA- CD8br %CD8br | GCST90001692 |
| Absolute count | Treg | Treg_Trait608 | CD28+ CD45RA- CD8br AC | GCST90001693 |
| Relative count | Treg | Treg_Trait611 | CD28- DN (CD4-CD8-) %T cell | GCST90001694 |
| Absolute count | Treg | Treg_Trait700 | CD45RA- CD28- CD8br AC | GCST90001695 |
| Relative count | Treg | Treg_Trait701 | CD45RA- CD28- CD8br %CD8br | GCST90001696 |
| Relative count | Treg | Treg_Trait702 | CD45RA- CD28- CD8br %T cell | GCST90001697 |
| Absolute count | Treg | Treg_Trait706 | CD45RA+ CD28- CD8br AC | GCST90001698 |
| Relative count | Treg | Treg_Trait707 | CD45RA+ CD28- CD8br %CD8br | GCST90001699 |
| Relative count | Treg | Treg_Trait708 | CD45RA+ CD28- CD8br %T cell | GCST90001700 |
| MFI | B cell | Bcells.trait111 | BAFF-R on CD20- CD38- | GCST90001701 |
| MFI | B cell | Bcells.trait112 | BAFF-R on CD24+ CD27+ | GCST90001702 |
| MFI | B cell | Bcells.trait137 | BAFF-R on IgD+ CD24+ | GCST90001703 |
| MFI | B cell | Bcells.trait138 | BAFF-R on IgD+ CD24- | GCST90001704 |
| MFI | B cell | Bcells.trait139 | BAFF-R on IgD+ CD38- | GCST90001705 |
| MFI | B cell | Bcells.trait140 | BAFF-R on IgD+ CD38- naive | GCST90001706 |
| MFI | B cell | Bcells.trait141 | BAFF-R on IgD+ CD38- unsw mem | GCST90001707 |
| MFI | B cell | Bcells.trait142 | BAFF-R on IgD+ CD38br | GCST90001708 |
| MFI | B cell | Bcells.trait143 | BAFF-R on IgD+ CD38dim | GCST90001709 |
| MFI | B cell | Bcells.trait147 | BAFF-R on IgD- CD24- | GCST90001710 |
| MFI | B cell | Bcells.trait148 | BAFF-R on IgD- CD27- | GCST90001711 |
| MFI | B cell | Bcells.trait149 | BAFF-R on IgD- CD38- | GCST90001712 |
| MFI | B cell | Bcells.trait150 | BAFF-R on IgD- CD38br | GCST90001713 |
| MFI | B cell | Bcells.trait151 | BAFF-R on IgD- CD38dim | GCST90001714 |
| MFI | B cell | Bcells.trait154 | BAFF-R on memory B cell | GCST90001715 |
| MFI | B cell | Bcells.trait156 | BAFF-R on naive-mature B cell | GCST90001716 |
| MFI | B cell | Bcells.trait157 | BAFF-R on unsw mem | GCST90001717 |
| MFI | B cell | Bcells.trait159 | BAFF-R on sw mem | GCST90001718 |
| MFI | B cell | Bcells.trait160 | BAFF-R on IgD+ | GCST90001719 |
| MFI | B cell | Bcells.trait161 | BAFF-R on transitional | GCST90001720 |
| MFI | B cell | Bcells.trait255 | CD19 on CD20- | GCST90001721 |
| MFI | B cell | Bcells.trait282 | CD19 on CD20- CD38- | GCST90001722 |
| MFI | B cell | Bcells.trait283 | CD19 on CD24+ CD27+ | GCST90001723 |
| MFI | B cell | Bcells.trait308 | CD19 on IgD+ CD24+ | GCST90001724 |
| MFI | B cell | Bcells.trait309 | CD19 on IgD+ CD24- | GCST90001725 |
| MFI | B cell | Bcells.trait310 | CD19 on IgD+ CD38- | GCST90001726 |
| MFI | B cell | Bcells.trait311 | CD19 on IgD+ CD38- naive | GCST90001727 |
| MFI | B cell | Bcells.trait312 | CD19 on IgD+ CD38- unsw mem | GCST90001728 |
| MFI | B cell | Bcells.trait313 | CD19 on IgD+ CD38br | GCST90001729 |
| MFI | B cell | Bcells.trait314 | CD19 on IgD+ CD38dim | GCST90001730 |
| MFI | B cell | Bcells.trait318 | CD19 on IgD- CD24- | GCST90001731 |
| MFI | B cell | Bcells.trait319 | CD19 on IgD- CD27- | GCST90001732 |
| MFI | B cell | Bcells.trait320 | CD19 on IgD- CD38- | GCST90001733 |
| MFI | B cell | Bcells.trait321 | CD19 on IgD- CD38br | GCST90001734 |
| MFI | B cell | Bcells.trait322 | CD19 on IgD- CD38dim | GCST90001735 |
| MFI | B cell | Bcells.trait325 | CD19 on memory B cell | GCST90001736 |
| MFI | B cell | Bcells.trait327 | CD19 on naive-mature B cell | GCST90001737 |
| MFI | B cell | Bcells.trait328 | CD19 on unsw mem | GCST90001738 |
| MFI | B cell | Bcells.trait329 | CD19 on PB/PC | GCST90001739 |
| MFI | B cell | Bcells.trait331 | CD19 on sw mem | GCST90001740 |
| MFI | B cell | Bcells.trait332 | CD19 on IgD+ | GCST90001741 |
| MFI | B cell | Bcells.trait333 | CD19 on transitional | GCST90001742 |
| MFI | B cell | Bcells.trait335 | CD20 on B cell | GCST90001743 |
| MFI | B cell | Bcells.trait354 | CD20 on CD20- CD38- | GCST90001744 |
| MFI | B cell | Bcells.trait355 | CD20 on CD24+ CD27+ | GCST90001745 |
| MFI | B cell | Bcells.trait378 | CD20 on IgD+ CD24+ | GCST90001746 |
| MFI | B cell | Bcells.trait379 | CD20 on IgD+ CD24- | GCST90001747 |
| MFI | B cell | Bcells.trait380 | CD20 on IgD+ CD38- | GCST90001748 |
| MFI | B cell | Bcells.trait381 | CD20 on IgD+ CD38- naive | GCST90001749 |
| MFI | B cell | Bcells.trait382 | CD20 on IgD+ CD38- unsw mem | GCST90001750 |
| MFI | B cell | Bcells.trait383 | CD20 on IgD+ CD38br | GCST90001751 |
| MFI | B cell | Bcells.trait384 | CD20 on IgD+ CD38dim | GCST90001752 |
| MFI | B cell | Bcells.trait388 | CD20 on IgD- CD24- | GCST90001753 |
| MFI | B cell | Bcells.trait389 | CD20 on IgD- CD27- | GCST90001754 |
| MFI | B cell | Bcells.trait390 | CD20 on IgD- CD38- | GCST90001755 |
| MFI | B cell | Bcells.trait391 | CD20 on IgD- CD38br | GCST90001756 |
| MFI | B cell | Bcells.trait392 | CD20 on IgD- CD38dim | GCST90001757 |
| MFI | B cell | Bcells.trait395 | CD20 on memory B cell | GCST90001758 |
| MFI | B cell | Bcells.trait397 | CD20 on naive-mature B cell | GCST90001759 |
| MFI | B cell | Bcells.trait398 | CD20 on unsw mem | GCST90001760 |
| MFI | B cell | Bcells.trait399 | CD20 on sw mem | GCST90001761 |
| MFI | B cell | Bcells.trait400 | CD20 on IgD+ | GCST90001762 |
| MFI | B cell | Bcells.trait401 | CD20 on transitional | GCST90001763 |
| MFI | B cell | Bcells.trait418 | CD24 on CD24+ CD27+ | GCST90001764 |
| MFI | B cell | Bcells.trait438 | CD24 on IgD+ CD24+ | GCST90001765 |
| MFI | B cell | Bcells.trait439 | CD24 on IgD+ CD38- | GCST90001766 |
| MFI | B cell | Bcells.trait441 | CD24 on IgD+ CD38- unsw mem | GCST90001767 |
| MFI | B cell | Bcells.trait442 | CD24 on IgD+ CD38br | GCST90001768 |
| MFI | B cell | Bcells.trait445 | CD24 on IgD- CD38- | GCST90001769 |
| MFI | B cell | Bcells.trait446 | CD24 on IgD- CD38dim | GCST90001770 |
| MFI | B cell | Bcells.trait448 | CD24 on memory B cell | GCST90001771 |
| MFI | B cell | Bcells.trait449 | CD24 on unsw mem | GCST90001772 |
| MFI | B cell | Bcells.trait450 | CD24 on sw mem | GCST90001773 |
| MFI | B cell | Bcells.trait451 | CD24 on transitional | GCST90001774 |
| MFI | B cell | Bcells.trait453 | CD25 on B cell | GCST90001775 |
| MFI | B cell | Bcells.trait470 | CD25 on CD20- CD38- | GCST90001776 |
| MFI | B cell | Bcells.trait471 | CD25 on CD24+ CD27+ | GCST90001777 |
| MFI | B cell | Bcells.trait490 | CD25 on IgD+ CD24+ | GCST90001778 |
| MFI | B cell | Bcells.trait491 | CD25 on IgD+ CD24- | GCST90001779 |
| MFI | B cell | Bcells.trait492 | CD25 on IgD+ CD38- | GCST90001780 |
| MFI | B cell | Bcells.trait493 | CD25 on IgD+ CD38- naive | GCST90001781 |
| MFI | B cell | Bcells.trait494 | CD25 on IgD+ CD38- unsw mem | GCST90001782 |
| MFI | B cell | Bcells.trait495 | CD25 on IgD+ CD38br | GCST90001783 |
| MFI | B cell | Bcells.trait496 | CD25 on IgD+ CD38dim | GCST90001784 |
| MFI | B cell | Bcells.trait500 | CD25 on IgD- CD24- | GCST90001785 |
| MFI | B cell | Bcells.trait501 | CD25 on IgD- CD27- | GCST90001786 |
| MFI | B cell | Bcells.trait502 | CD25 on IgD- CD38- | GCST90001787 |
| MFI | B cell | Bcells.trait503 | CD25 on IgD- CD38br | GCST90001788 |
| MFI | B cell | Bcells.trait504 | CD25 on IgD- CD38dim | GCST90001789 |
| MFI | B cell | Bcells.trait506 | CD25 on memory B cell | GCST90001790 |
| MFI | B cell | Bcells.trait508 | CD25 on naive-mature B cell | GCST90001791 |
| MFI | B cell | Bcells.trait509 | CD25 on unsw mem | GCST90001792 |
| MFI | B cell | Bcells.trait510 | CD25 on sw mem | GCST90001793 |
| MFI | B cell | Bcells.trait511 | CD25 on IgD+ | GCST90001794 |
| MFI | B cell | Bcells.trait512 | CD25 on transitional | GCST90001795 |
| MFI | B cell | Bcells.trait514 | CD27 on CD20- | GCST90001796 |
| MFI | B cell | Bcells.trait536 | CD27 on CD20- CD38- | GCST90001797 |
| MFI | B cell | Bcells.trait537 | CD27 on CD24+ CD27+ | GCST90001798 |
| MFI | B cell | Bcells.trait539 | CD27 on T cell | GCST90001799 |
| MFI | B cell | Bcells.trait561 | CD27 on IgD+ CD24+ | GCST90001800 |
| MFI | B cell | Bcells.trait563 | CD27 on IgD+ CD38- unsw mem | GCST90001801 |
| MFI | B cell | Bcells.trait565 | CD27 on IgD- CD38- | GCST90001802 |
| MFI | B cell | Bcells.trait566 | CD27 on IgD- CD38br | GCST90001803 |
| MFI | B cell | Bcells.trait567 | CD27 on IgD- CD38dim | GCST90001804 |
| MFI | B cell | Bcells.trait570 | CD27 on memory B cell | GCST90001805 |
| MFI | B cell | Bcells.trait571 | CD27 on unsw mem | GCST90001806 |
| MFI | B cell | Bcells.trait572 | CD27 on PB/PC | GCST90001807 |
| MFI | B cell | Bcells.trait574 | CD27 on sw mem | GCST90001808 |
| MFI | B cell | Bcells.trait597 | CD38 on CD20- | GCST90001809 |
| MFI | B cell | Bcells.trait619 | CD38 on CD3- CD19- | GCST90001810 |
| MFI | B cell | Bcells.trait637 | CD38 on IgD+ CD24- | GCST90001811 |
| MFI | B cell | Bcells.trait640 | CD38 on IgD+ CD38br | GCST90001812 |
| MFI | B cell | Bcells.trait641 | CD38 on IgD+ CD38dim | GCST90001813 |
| MFI | B cell | Bcells.trait643 | CD38 on IgD- CD38br | GCST90001814 |
| MFI | B cell | Bcells.trait644 | CD38 on IgD- CD38dim | GCST90001815 |
| MFI | B cell | Bcells.trait646 | CD38 on naive-mature B cell | GCST90001816 |
| MFI | B cell | Bcells.trait647 | CD38 on PB/PC | GCST90001817 |
| MFI | B cell | Bcells.trait649 | CD38 on IgD+ | GCST90001818 |
| MFI | B cell | Bcells.trait650 | CD38 on transitional | GCST90001819 |
| MFI | B cell | Bcells.trait775 | IgD on IgD+ CD24+ | GCST90001820 |
| MFI | B cell | Bcells.trait776 | IgD on IgD+ CD24- | GCST90001821 |
| MFI | B cell | Bcells.trait777 | IgD on IgD+ CD38- | GCST90001822 |
| MFI | B cell | Bcells.trait779 | IgD on IgD+ CD38- unsw mem | GCST90001823 |
| MFI | B cell | Bcells.trait780 | IgD on IgD+ CD38br | GCST90001824 |
| MFI | B cell | Bcells.trait781 | IgD on IgD+ CD38dim | GCST90001825 |
| MFI | B cell | Bcells.trait785 | IgD on unsw mem | GCST90001826 |
| MFI | B cell | Bcells.trait786 | IgD on IgD+ | GCST90001827 |
| MFI | B cell | Bcells.trait787 | IgD on transitional | GCST90001828 |
| MFI | B cell | Bcells.trait84 | BAFF-R on B cell | GCST90001829 |
| MFI | B cell | Bcells.trait85 | BAFF-R on CD20- | GCST90001830 |
| MFI | cDC | Blue.530.30.cDC.trait1 | CD62L on CD62L+ myeloid DC | GCST90001831 |
| MFI | cDC | Blue.530.30.cDC.trait2 | CD62L on CD62L+ plasmacytoid DC | GCST90001832 |
| MFI | cDC | Blue.530.30.cDC.trait3 | CD62L on CD62L+ DC | GCST90001833 |
| MFI | cDC | Blue.530.30.cDC.trait4 | CD62L on monocyte | GCST90001834 |
| MFI | cDC | Blue.530.30.cDC.trait5 | CD62L on granulocyte | GCST90001835 |
| MFI | Myeloid cell | Blue.530.30.MDSC.trait1 | CD66b on CD66b++ myeloid cell | GCST90001836 |
| MFI | Myeloid cell | Blue.530.30.MDSC.trait2 | CD66b on Gr MDSC | GCST90001837 |
| MFI | Maturation stages of T cell | Blue.530.30.MT.trait10 | CD3 on naive CD8br | GCST90001838 |
| MFI | Maturation stages of T cell | Blue.530.30.MT.trait11 | CD3 on EM CD8br | GCST90001839 |
| MFI | Maturation stages of T cell | Blue.530.30.MT.trait12 | CD3 on TD CD8br | GCST90001840 |
| MFI | Maturation stages of T cell | Blue.530.30.MT.trait3 | CD3 on CM CD4+ | GCST90001841 |
| MFI | Maturation stages of T cell | Blue.530.30.MT.trait4 | CD3 on Naive CD4+ | GCST90001842 |
| MFI | Maturation stages of T cell | Blue.530.30.MT.trait5 | CD3 on EM CD4+ | GCST90001843 |
| MFI | Maturation stages of T cell | Blue.530.30.MT.trait6 | CD3 on TD CD4+ | GCST90001844 |
| MFI | Maturation stages of T cell | Blue.530.30.MT.trait7 | CD3 on CD45RA- CD4+ | GCST90001845 |
| MFI | Maturation stages of T cell | Blue.530.30.MT.trait9 | CD3 on CM CD8br | GCST90001846 |
| MFI | TBNK | Blue.530.30.TBNK.trait4 | CD3 on HLA-DR+ T cell | GCST90001847 |
| MFI | TBNK | Blue.530.30.TBNK.trait5 | CD3 on NKT | GCST90001848 |
| MFI | TBNK | Blue.530.30.TBNK.trait6 | CD3 on HLA-DR+ CD4+ | GCST90001849 |
| MFI | TBNK | Blue.530.30.TBNK.trait7 | CD3 on HLA-DR+ CD8br | GCST90001850 |
| MFI | Treg | Blue.530.30.Treg.trait1 | CD3 on T cell | GCST90001851 |
| MFI | Treg | Blue.530.30.Treg.trait10 | CD3 on CD39+ resting Treg | GCST90001852 |
| MFI | Treg | Blue.530.30.Treg.trait11 | CD3 on activated Treg | GCST90001853 |
| MFI | Treg | Blue.530.30.Treg.trait12 | CD3 on CD39+ activated Treg | GCST90001854 |
| MFI | Treg | Blue.530.30.Treg.trait13 | CD3 on secreting Treg | GCST90001855 |
| MFI | Treg | Blue.530.30.Treg.trait14 | CD3 on CD39+ secreting Treg | GCST90001856 |
| MFI | Treg | Blue.530.30.Treg.trait15 | CD3 on activated & secreting Treg | GCST90001857 |
| MFI | Treg | Blue.530.30.Treg.trait17 | CD3 on CD45RA+ CD4+ | GCST90001858 |
| MFI | Treg | Blue.530.30.Treg.trait2 | CD3 on CD8br | GCST90001859 |
| MFI | Treg | Blue.530.30.Treg.trait21 | CD3 on CD39+ CD4+ | GCST90001860 |
| MFI | Treg | Blue.530.30.Treg.trait22 | CD3 on CD28+ CD4+ | GCST90001861 |
| MFI | Treg | Blue.530.30.Treg.trait23 | CD3 on CD28+ DN (CD4-CD8-) | GCST90001862 |
| MFI | Treg | Blue.530.30.Treg.trait3 | CD3 on CD28+ CD45RA- CD8br | GCST90001863 |
| MFI | Treg | Blue.530.30.Treg.trait4 | CD3 on CD28+ CD45RA+ CD8br | GCST90001864 |
| MFI | Treg | Blue.530.30.Treg.trait5 | CD3 on CD28- CD8br | GCST90001865 |
| MFI | Treg | Blue.530.30.Treg.trait6 | CD3 on CD39+ CD8br | GCST90001866 |
| MFI | Treg | Blue.530.30.Treg.trait7 | CD3 on CD4+ | GCST90001867 |
| MFI | Treg | Blue.530.30.Treg.trait8 | CD3 on CD4 Treg | GCST90001868 |
| MFI | Treg | Blue.530.30.Treg.trait9 | CD3 on resting Treg | GCST90001869 |
| MFI | Myeloid cell | Blue.585.42.MDSC.trait1 | CD34 on HSC | GCST90001870 |
| MFI | Maturation stages of T cell | HVEM1000_150630.trait1 | HVEM on T cell | GCST90001871 |
| MFI | Maturation stages of T cell | HVEM1000_150630.trait10 | HVEM on naive CD8br | GCST90001872 |
| MFI | Maturation stages of T cell | HVEM1000_150630.trait11 | HVEM on EM CD8br | GCST90001873 |
| MFI | Maturation stages of T cell | HVEM1000_150630.trait12 | HVEM on TD CD8br | GCST90001874 |
| MFI | Maturation stages of T cell | HVEM1000_150630.trait2 | HVEM on CD4+ | GCST90001875 |
| MFI | Maturation stages of T cell | HVEM1000_150630.trait3 | HVEM on CM CD4+ | GCST90001876 |
| MFI | Maturation stages of T cell | HVEM1000_150630.trait4 | HVEM on naive CD4+ | GCST90001877 |
| MFI | Maturation stages of T cell | HVEM1000_150630.trait5 | HVEM on EM CD4+ | GCST90001878 |
| MFI | Maturation stages of T cell | HVEM1000_150630.trait6 | HVEM on TD CD4+ | GCST90001879 |
| MFI | Maturation stages of T cell | HVEM1000_150630.trait7 | HVEM on CD45RA- CD4+ | GCST90001880 |
| MFI | Maturation stages of T cell | HVEM1000_150630.trait8 | HVEM on CD8br | GCST90001881 |
| MFI | Maturation stages of T cell | HVEM1000_150630.trait9 | HVEM on CM CD8br | GCST90001882 |
| MFI | TBNK | Blue.585.42.TBNK.trait1 | CD16-CD56 on NKT | GCST90001883 |
| MFI | TBNK | Blue.585.42.TBNK.trait2 | CD16-CD56 on NK | GCST90001884 |
| MFI | TBNK | Blue.585.42.TBNK.trait3 | CD16-CD56 on HLA-DR+ NK | GCST90001885 |
| MFI | Treg | Blue.585.42.Treg.trait10 | CD28 on CD39+ activated Treg | GCST90001886 |
| MFI | Treg | Blue.585.42.Treg.trait11 | CD28 on secreting Treg | GCST90001887 |
| MFI | Treg | Blue.585.42.Treg.trait12 | CD28 on CD39+ secreting Treg | GCST90001888 |
| MFI | Treg | Blue.585.42.Treg.trait13 | CD28 on activated & secreting Treg | GCST90001889 |
| MFI | Treg | Blue.585.42.Treg.trait15 | CD28 on CD45RA+ CD4+ | GCST90001890 |
| MFI | Treg | Blue.585.42.Treg.trait18 | CD28 on CD45RA- CD4 not Treg | GCST90001891 |
| MFI | Treg | Blue.585.42.Treg.trait19 | CD28 on CD39+ CD4+ | GCST90001892 |
| MFI | Treg | Blue.585.42.Treg.trait2 | CD28 on CD28+ CD45RA- CD8br | GCST90001893 |
| MFI | Treg | Blue.585.42.Treg.trait20 | CD28 on CD28+ CD4+ | GCST90001894 |
| MFI | Treg | Blue.585.42.Treg.trait21 | CD28 on CD28+ DN (CD4-CD8-) | GCST90001895 |
| MFI | Treg | Blue.585.42.Treg.trait3 | CD28 on CD28+ CD45RA+ CD8br | GCST90001896 |
| MFI | Treg | Blue.585.42.Treg.trait4 | CD28 on CD39+ CD8br | GCST90001897 |
| MFI | Treg | Blue.585.42.Treg.trait5 | CD28 on CD4+ | GCST90001898 |
| MFI | Treg | Blue.585.42.Treg.trait6 | CD28 on CD4 Treg | GCST90001899 |
| MFI | Treg | Blue.585.42.Treg.trait7 | CD28 on resting Treg | GCST90001900 |
| MFI | Treg | Blue.585.42.Treg.trait8 | CD28 on CD39+ resting Treg | GCST90001901 |
| MFI | Treg | Blue.585.42.Treg.trait9 | CD28 on activated Treg | GCST90001902 |
| MFI | cDC | Blue.670.LP.cDC.trait1 | CD86 on myeloid DC | GCST90001903 |
| MFI | cDC | Blue.670.LP.cDC.trait2 | CD86 on CD62L+ myeloid DC | GCST90001904 |
| MFI | cDC | Blue.670.LP.cDC.trait3 | CD86 on monocyte | GCST90001905 |
| MFI | cDC | Blue.670.LP.cDC.trait4 | CD86 on granulocyte | GCST90001906 |
| MFI | Maturation stages of T cell | Blue.670.LP.MT.trait1 | CCR7 on naive CD4+ | GCST90001907 |
| MFI | Maturation stages of T cell | Blue.670.LP.MT.trait3 | CCR7 on naive CD8br | GCST90001908 |
| MFI | TBNK | Blue.670.LP.TBNK.trait1 | CD45 on CD14+ monocyte | GCST90001909 |
| MFI | TBNK | Blue.670.LP.TBNK.trait10 | CD45 on B cell | GCST90001910 |
| MFI | TBNK | Blue.670.LP.TBNK.trait11 | CD45 on NK | GCST90001911 |
| MFI | TBNK | Blue.670.LP.TBNK.trait12 | CD45 on HLA-DR+ NK | GCST90001912 |
| MFI | TBNK | Blue.670.LP.TBNK.trait13 | CD45 on granulocyte | GCST90001913 |
| MFI | TBNK | Blue.670.LP.TBNK.trait2 | CD45 on lymphocyte | GCST90001914 |
| MFI | TBNK | Blue.670.LP.TBNK.trait3 | CD45 on T cell | GCST90001915 |
| MFI | TBNK | Blue.670.LP.TBNK.trait4 | CD45 on CD4+ | GCST90001916 |
| MFI | TBNK | Blue.670.LP.TBNK.trait5 | CD45 on CD8br | GCST90001917 |
| MFI | TBNK | Blue.670.LP.TBNK.trait6 | CD45 on HLA-DR+ T cell | GCST90001918 |
| MFI | TBNK | Blue.670.LP.TBNK.trait7 | CD45 on NKT | GCST90001919 |
| MFI | TBNK | Blue.670.LP.TBNK.trait8 | CD45 on HLA-DR+ CD4+ | GCST90001920 |
| MFI | TBNK | Blue.670.LP.TBNK.trait9 | CD45 on HLA-DR+ CD8br | GCST90001921 |
| MFI | Treg | Blue.670.LP.Treg.trait1 | CD127 on T cell | GCST90001922 |
| MFI | Treg | Blue.670.LP.Treg.trait10 | CD127 on CD45RA- CD4 not Treg | GCST90001923 |
| MFI | Treg | Blue.670.LP.Treg.trait11 | CD127 on CD28+ CD4+ | GCST90001924 |
| MFI | Treg | Blue.670.LP.Treg.trait12 | CD127 on CD28+ DN (CD4-CD8-) | GCST90001925 |
| MFI | Treg | Blue.670.LP.Treg.trait13 | CD127 on granulocyte | GCST90001926 |
| MFI | Treg | Blue.670.LP.Treg.trait2 | CD127 on CD8br | GCST90001927 |
| MFI | Treg | Blue.670.LP.Treg.trait3 | CD127 on CD28+ CD45RA- CD8br | GCST90001928 |
| MFI | Treg | Blue.670.LP.Treg.trait4 | CD127 on CD28+ CD45RA+ CD8br | GCST90001929 |
| MFI | Treg | Blue.670.LP.Treg.trait5 | CD127 on CD28- CD8br | GCST90001930 |
| MFI | Treg | Blue.670.LP.Treg.trait6 | CD127 on CD4+ | GCST90001931 |
| MFI | Treg | Blue.670.LP.Treg.trait7 | CD127 on CD45RA+ CD4+ | GCST90001932 |
| MFI | Treg | Blue.780.60.CD25.trait1 | CD25 on CD45RA- CD4 not Treg | GCST90001933 |
| MFI | Treg | Blue.780.60.CD25.trait13 | CD25 on CD45RA+ CD4 not Treg | GCST90001934 |
| MFI | Treg | Blue.780.60.CD25.trait10 | CD25 on CD39+ CD4 Treg | GCST90001935 |
| MFI | Treg | Blue.780.60.CD25.trait2 | CD25 on CD4 Treg | GCST90001936 |
| MFI | Treg | Blue.780.60.CD25.trait3 | CD25 on resting Treg | GCST90001937 |
| MFI | Treg | Blue.780.60.CD25.trait4 | CD25 on CD39+ resting Treg | GCST90001938 |
| MFI | Treg | Blue.780.60.CD25.trait5 | CD25 on activated Treg | GCST90001939 |
| MFI | Treg | Blue.780.60.CD25.trait6 | CD25 on CD39+ activated Treg | GCST90001940 |
| MFI | Treg | Blue.780.60.CD25.trait7 | CD25 on secreting Treg | GCST90001941 |
| MFI | Treg | Blue.780.60.CD25.trait8 | CD25 on CD39+ secreting Treg | GCST90001942 |
| MFI | Treg | Blue.780.60.CD25.trait9 | CD25 on activated & secreting Treg | GCST90001943 |
| MFI | cDC | Blue.780.60.cDC.trait1 | CD123 on plasmacytoid DC | GCST90001944 |
| MFI | cDC | Blue.780.60.cDC.trait2 | CD123 on CD62L+ plasmacytoid DC | GCST90001945 |
| MFI | Myeloid cell | Blue.780.60.MDSC.trait1 | CD33 on CD14+ monocyte | GCST90001946 |
| MFI | Myeloid cell | Blue.780.60.MDSC.trait10 | CD33 on CD33br HLA-DR+ CD14dim | GCST90001947 |
| MFI | Myeloid cell | Blue.780.60.MDSC.trait12 | CD33 on CD33dim HLA-DR+ CD11b+ | GCST90001948 |
| MFI | Myeloid cell | Blue.780.60.MDSC.trait13 | CD33 on CD33dim HLA-DR+ CD11b- | GCST90001949 |
| MFI | Myeloid cell | Blue.780.60.MDSC.trait14 | CD33 on Gr MDSC | GCST90001950 |
| MFI | Myeloid cell | Blue.780.60.MDSC.trait2 | CD33 on CD66b++ myeloid cell | GCST90001951 |
| MFI | Myeloid cell | Blue.780.60.MDSC.trait3 | CD33 on Mo MDSC | GCST90001952 |
| MFI | Myeloid cell | Blue.780.60.MDSC.trait4 | CD33 on CD33dim HLA-DR- | GCST90001953 |
| MFI | Myeloid cell | Blue.780.60.MDSC.trait6 | CD33 on basophil | GCST90001954 |
| MFI | Myeloid cell | Blue.780.60.MDSC.trait7 | CD33 on Im MDSC | GCST90001955 |
| MFI | Myeloid cell | Blue.780.60.MDSC.trait8 | CD33 on CD33br HLA-DR+ | GCST90001956 |
| MFI | Myeloid cell | Blue.780.60.MDSC.trait9 | CD33 on CD33br HLA-DR+ CD14- | GCST90001957 |
| MFI | TBNK | Blue.780.60.TBNK.trait1 | CD4 on monocyte | GCST90001958 |
| MFI | TBNK | Blue.780.60.TBNK.trait3 | CD4 on HLA-DR+ CD4+ | GCST90001959 |
| MFI | Treg | Blue.780.60.Treg.trait4 | CD25 on CD4+ | GCST90001960 |
| MFI | Treg | Blue.780.60.Treg.trait5 | CD25 on CD39+ CD4+ | GCST90001961 |
| MFI | Treg | Blue.780.60.Treg.trait6 | CD25 on CD28+ CD4+ | GCST90001962 |
| Morphological parameter | cDC | FSC.cDC.trait2 | FSC-A on myeloid DC | GCST90001963 |
| Morphological parameter | cDC | FSC.cDC.trait3 | FSC-A on plasmacytoid DC | GCST90001964 |
| Morphological parameter | cDC | FSC.cDC.trait4 | FSC-A on monocyte | GCST90001965 |
| Morphological parameter | cDC | FSC.cDC.trait5 | FSC-A on granulocyte | GCST90001966 |
| Morphological parameter | TBNK | FSC.TBNK.trait1 | FSC-A on CD14+ monocyte | GCST90001967 |
| Morphological parameter | TBNK | FSC.TBNK.trait10 | FSC-A on B cell | GCST90001968 |
| Morphological parameter | TBNK | FSC.TBNK.trait11 | FSC-A on NK | GCST90001969 |
| Morphological parameter | TBNK | FSC.TBNK.trait12 | FSC-A on HLA-DR+ NK | GCST90001970 |
| Morphological parameter | TBNK | FSC.TBNK.trait2 | FSC-A on lymphocyte | GCST90001971 |
| Morphological parameter | TBNK | FSC.TBNK.trait3 | FSC-A on T cell | GCST90001972 |
| Morphological parameter | TBNK | FSC.TBNK.trait4 | FSC-A on CD4+ | GCST90001973 |
| Morphological parameter | TBNK | FSC.TBNK.trait5 | FSC-A on CD8br | GCST90001974 |
| Morphological parameter | TBNK | FSC.TBNK.trait6 | FSC-A on HLA-DR+ T cell | GCST90001975 |
| Morphological parameter | TBNK | FSC.TBNK.trait7 | FSC-A on NKT | GCST90001976 |
| Morphological parameter | TBNK | FSC.TBNK.trait8 | FSC-A on HLA-DR+ CD4+ | GCST90001977 |
| Morphological parameter | TBNK | FSC.TBNK.trait9 | FSC-A on HLA-DR+ CD8br | GCST90001978 |
| MFI | Monocyte | mono.trait1 | CD16 on CD14- CD16+ monocyte | GCST90001979 |
| MFI | Monocyte | mono.trait10 | CD40 on CD14+ CD16- monocyte | GCST90001980 |
| MFI | Monocyte | mono.trait11 | CD40 on CD14+ CD16+ monocyte | GCST90001981 |
| MFI | Monocyte | mono.trait12 | CCR2 on CD14- CD16+ monocyte | GCST90001982 |
| MFI | Monocyte | mono.trait14 | CD14 on CD14+ CD16+ monocyte | GCST90001983 |
| MFI | Monocyte | mono.trait16 | HLA-DR on CD14- CD16+ monocyte | GCST90001984 |
| MFI | Monocyte | mono.trait17 | CD40 on monocytes | GCST90001985 |
| MFI | Monocyte | mono.trait19 | CD14 on CD14+ CD16- monocyte | GCST90001986 |
| MFI | Monocyte | mono.trait2 | CD64 on CD14+ CD16- monocyte | GCST90001987 |
| MFI | Monocyte | mono.trait21 | HLA-DR on CD14+ CD16- monocyte | GCST90001988 |
| MFI | Monocyte | mono.trait22 | CD40 on CD14- CD16+ monocyte | GCST90001989 |
| MFI | Monocyte | mono.trait24 | CD64 on CD14- CD16+ monocyte | GCST90001990 |
| MFI | Monocyte | mono.trait25 | HLA-DR on CD14+ monocyte | GCST90001991 |
| MFI | Monocyte | mono.trait28 | CCR2 on CD14+ CD16+ monocyte | GCST90001992 |
| MFI | Monocyte | mono.trait29 | PDL-1 on CD14+ CD16- monocyte | GCST90001993 |
| MFI | Monocyte | mono.trait3 | CX3CR1 on CD14- CD16- | GCST90001994 |
| MFI | Monocyte | mono.trait33 | CX3CR1 on monocyte | GCST90001995 |
| MFI | Monocyte | mono.trait35 | CX3CR1 on CD14+ CD16+ monocyte | GCST90001996 |
| MFI | Monocyte | mono.trait36 | CX3CR1 on CD14+ CD16- monocyte | GCST90001997 |
| MFI | Monocyte | mono.trait39 | PDL-1 on CD14+ CD16+ monocyte | GCST90001998 |
| MFI | Monocyte | mono.trait4 | PDL-1 on CD14- CD16+ monocyte | GCST90001999 |
| MFI | Monocyte | mono.trait41 | PDL-1 on CD14- CD16- | GCST90002000 |
| MFI | Monocyte | mono.trait42 | CD64 on CD14- CD16- | GCST90002001 |
| MFI | Monocyte | mono.trait43 | PDL-1 on monocyte | GCST90002002 |
| MFI | Monocyte | mono.trait44 | CCR2 on CD14- CD16- | GCST90002003 |
| MFI | Monocyte | mono.trait46 | CCR2 on CD14+ CD16- monocyte | GCST90002004 |
| MFI | Monocyte | mono.trait47 | CD16 on CD14+ CD16+ monocyte | GCST90002005 |
| MFI | Monocyte | mono.trait48 | CD64 on monocyte | GCST90002006 |
| MFI | Monocyte | mono.trait50 | HLA-DR on CD14+ CD16+ monocyte | GCST90002007 |
| MFI | Monocyte | mono.trait52 | CCR2 on monocyte | GCST90002008 |
| MFI | Monocyte | mono.trait53 | HLA-DR on CD14- CD16- | GCST90002009 |
| MFI | Monocyte | mono.trait54 | HLA-DR on monocyte | GCST90002010 |
| MFI | Monocyte | mono.trait6 | CD64 on CD14+ CD16+ monocyte | GCST90002011 |
| MFI | Monocyte | mono.trait7 | CX3CR1 on CD14- CD16+ monocyte | GCST90002012 |
| MFI | cDC | Red.660.20.cDC.trait1 | CCR2 on myeloid DC | GCST90002013 |
| MFI | cDC | Red.660.20.cDC.trait2 | CCR2 on CD62L+ myeloid DC | GCST90002014 |
| MFI | cDC | Red.660.20.cDC.trait3 | CCR2 on plasmacytoid DC | GCST90002015 |
| MFI | cDC | Red.660.20.cDC.trait4 | CCR2 on CD62L+ plasmacytoid DC | GCST90002016 |
| MFI | cDC | Red.660.20.cDC.trait5 | CCR2 on monocyte | GCST90002017 |
| MFI | cDC | Red.660.20.cDC.trait6 | CCR2 on granulocyte | GCST90002018 |
| MFI | Myeloid cell | Red.660.20.MDSC.trait2 | CD14 on Mo MDSC | GCST90002019 |
| MFI | Myeloid cell | Red.660.20.MDSC.trait3 | CD14 on CD33br HLA-DR+ CD14dim | GCST90002020 |
| MFI | Myeloid cell | Red.660.20.MDSC.trait4 | CD14 on CD33dim HLA-DR+ CD11b+ | GCST90002021 |
| MFI | Maturation stages of T cell | Red.660.20.MT.trait1 | CD4 on CD4+ | GCST90002022 |
| MFI | Maturation stages of T cell | Red.660.20.MT.trait2 | CD4 on CM CD4 + | GCST90002023 |
| MFI | Maturation stages of T cell | Red.660.20.MT.trait3 | CD4 on naive CD4+ | GCST90002024 |
| MFI | Maturation stages of T cell | Red.660.20.MT.trait4 | CD4 on EM CD4+ | GCST90002025 |
| MFI | Maturation stages of T cell | Red.660.20.MT.trait5 | CD4 on TD CD4+ | GCST90002026 |
| MFI | Maturation stages of T cell | Red.660.20.MT.trait6 | CD4 on CD45RA+ CD4+ | GCST90002027 |
| MFI | TBNK | Red.660.20.TBNK.trait2 | CD19 on B cell | GCST90002028 |
| MFI | Treg | Red.660.20.Treg.trait1 | CD39 on CD39+ CD8br | GCST90002029 |
| MFI | Treg | Red.660.20.Treg.trait2 | CD39 on CD39+ activated Treg | GCST90002030 |
| MFI | Treg | Red.660.20.Treg.trait3 | CD39 on CD39+ secreting Treg | GCST90002031 |
| MFI | Treg | Red.660.20.Treg.trait5 | CD39 on CD39+ CD4+ | GCST90002032 |
| MFI | Treg | Red.660.20.Treg.trait6 | CD39 on granulocyte | GCST90002033 |
| MFI | Treg | Red.660.20.Treg.trait7 | CD39 on monocyte | GCST90002034 |
| MFI | cDC | Red.780.60.cDC.trait1 | CD80 on myeloid DC | GCST90002035 |
| MFI | cDC | Red.780.60.cDC.trait2 | CD80 on CD62L+ myeloid DC | GCST90002036 |
| MFI | cDC | Red.780.60.cDC.trait3 | CD80 on plasmacytoid DC | GCST90002037 |
| MFI | cDC | Red.780.60.cDC.trait4 | CD80 on CD62L+ plasmacytoid DC | GCST90002038 |
| MFI | cDC | Red.780.60.cDC.trait5 | CD80 on monocyte | GCST90002039 |
| MFI | cDC | Red.780.60.cDC.trait6 | CD80 on granulocyte | GCST90002040 |
| MFI | Myeloid cell | Red.780.60.MDSC.trait1 | CD45 on lymphocyte | GCST90002041 |
| MFI | Myeloid cell | Red.780.60.MDSC.trait10 | CD45 on CD33br HLA-DR+ CD14- | GCST90002042 |
| MFI | Myeloid cell | Red.780.60.MDSC.trait11 | CD45 on CD33br HLA-DR+ CD14dim | GCST90002043 |
| MFI | Myeloid cell | Red.780.60.MDSC.trait13 | CD45 on CD33dim HLA-DR+ CD11b- | GCST90002044 |
| MFI | Myeloid cell | Red.780.60.MDSC.trait14 | CD45 on CD33- HLA-DR- | GCST90002045 |
| MFI | Myeloid cell | Red.780.60.MDSC.trait15 | CD45 on CD33- HLA-DR+ | GCST90002046 |
| MFI | Myeloid cell | Red.780.60.MDSC.trait16 | CD45 on Gr MDSC | GCST90002047 |
| MFI | Myeloid cell | Red.780.60.MDSC.trait3 | CD45 on CD66b++ myelod cell | GCST90002048 |
| MFI | Myeloid cell | Red.780.60.MDSC.trait4 | CD45 on Mo MDSC | GCST90002049 |
| MFI | Myeloid cell | Red.780.60.MDSC.trait5 | CD45 on CD33dim HLA-DR- | GCST90002050 |
| MFI | Myeloid cell | Red.780.60.MDSC.trait7 | CD45 on basophil | GCST90002051 |
| MFI | Myeloid cell | Red.780.60.MDSC.trait8 | CD45 on Im MDSC | GCST90002052 |
| MFI | Myeloid cell | Red.780.60.MDSC.trait9 | CD45 on CD33br HLA-DR+ | GCST90002053 |
| MFI | Maturation stages of T cell | Red.780.60.MT.trait2 | CD8 on CM CD8br | GCST90002054 |
| MFI | Maturation stages of T cell | Red.780.60.MT.trait3 | CD8 on naive CD8br | GCST90002055 |
| MFI | Maturation stages of T cell | Red.780.60.MT.trait4 | CD8 on EM CD8br | GCST90002056 |
| MFI | Maturation stages of T cell | Red.780.60.MT.trait5 | CD8 on TD CD8br | GCST90002057 |
| MFI | TBNK | Red.780.60.TBNK.trait1 | CD8 on CD8br | GCST90002058 |
| MFI | TBNK | Red.780.60.TBNK.trait2 | CD8 on NKT | GCST90002059 |
| MFI | TBNK | Red.780.60.TBNK.trait3 | CD8 on HLA-DR+ CD8br | GCST90002060 |
| MFI | Treg | Red.780.60.Treg.trait15 | CD4 on CD39+ CD4+ | GCST90002061 |
| MFI | Treg | Red.780.60.Treg.trait16 | CD4 on CD28+ CD4+ | GCST90002062 |
| MFI | Treg | Red.780.60.Treg.trait2 | CD4 on CD4 Treg | GCST90002063 |
| MFI | Treg | Red.780.60.Treg.trait3 | CD4 on resting Treg | GCST90002064 |
| MFI | Treg | Red.780.60.Treg.trait4 | CD4 on CD39+ resting Treg | GCST90002065 |
| MFI | Treg | Red.780.60.Treg.trait5 | CD4 on activated Treg | GCST90002066 |
| MFI | Treg | Red.780.60.Treg.trait6 | CD4 on CD39+ activated Treg | GCST90002067 |
| MFI | Treg | Red.780.60.Treg.trait7 | CD4 on secreting Treg | GCST90002068 |
| MFI | Treg | Red.780.60.Treg.trait8 | CD4 on CD39+ secreting Treg | GCST90002069 |
| MFI | Treg | Red.780.60.Treg.trait9 | CD4 on activated & secreting Treg | GCST90002070 |
| Morphological parameter | cDC | SSC.cDC.trait2 | SSC-A on myeloid DC | GCST90002071 |
| Morphological parameter | cDC | SSC.cDC.trait3 | SSC-A on plasmacytoid DC | GCST90002072 |
| Morphological parameter | cDC | SSC.cDC.trait4 | SSC-A on monocyte | GCST90002073 |
| Morphological parameter | TBNK | SSC.TBNK.trait1 | SSC-A on CD14+ monocyte | GCST90002074 |
| Morphological parameter | TBNK | SSC.TBNK.trait10 | SSC-A on B cell | GCST90002075 |
| Morphological parameter | TBNK | SSC.TBNK.trait11 | SSC-A on NK | GCST90002076 |
| Morphological parameter | TBNK | SSC.TBNK.trait12 | SSC-A on HLA-DR+ NK | GCST90002077 |
| Morphological parameter | TBNK | SSC.TBNK.trait13 | SSC-A on granulocyte | GCST90002078 |
| Morphological parameter | TBNK | SSC.TBNK.trait2 | SSC-A on lymphocyte | GCST90002079 |
| Morphological parameter | TBNK | SSC.TBNK.trait3 | SSC-A on T cell | GCST90002080 |
| Morphological parameter | TBNK | SSC.TBNK.trait4 | SSC-A on CD4+ | GCST90002081 |
| Morphological parameter | TBNK | SSC.TBNK.trait5 | SSC-A on CD8br | GCST90002082 |
| Morphological parameter | TBNK | SSC.TBNK.trait6 | SSC-A on HLA-DR+ T cell | GCST90002083 |
| Morphological parameter | TBNK | SSC.TBNK.trait7 | SSC-A on NKT | GCST90002084 |
| Morphological parameter | TBNK | SSC.TBNK.trait8 | SSC-A on HLA-DR+ CD4+ | GCST90002085 |
| Morphological parameter | TBNK | SSC.TBNK.trait9 | SSC-A on HLA-DR+ CD8br | GCST90002086 |
| MFI | cDC | Violet.450.50.cDC.trait1 | CD11c on myeloid DC | GCST90002087 |
| MFI | cDC | Violet.450.50.cDC.trait2 | CD11c on CD62L+ myeloid DC | GCST90002088 |
| MFI | cDC | Violet.450.50.cDC.trait3 | CD11c on monocyte | GCST90002089 |
| MFI | cDC | Violet.450.50.cDC.trait4 | CD11c on granulocyte | GCST90002090 |
| MFI | Myeloid cell | Violet.450.50.MDSC.trait1 | CD11b on CD14+ monocyte | GCST90002091 |
| MFI | Myeloid cell | Violet.450.50.MDSC.trait13 | CD11b on Gr MDSC | GCST90002092 |
| MFI | Myeloid cell | Violet.450.50.MDSC.trait2 | CD11b on CD66b++ myeloid cell | GCST90002093 |
| MFI | Myeloid cell | Violet.450.50.MDSC.trait3 | CD11b on Mo MDSC | GCST90002094 |
| MFI | Myeloid cell | Violet.450.50.MDSC.trait4 | CD11b on CD33dim HLA-DR- | GCST90002095 |
| MFI | Myeloid cell | Violet.450.50.MDSC.trait6 | CD11b on basophil | GCST90002096 |
| MFI | Myeloid cell | Violet.450.50.MDSC.trait9 | CD11b on CD33br HLA-DR+ CD14dim | GCST90002097 |
| MFI | Maturation stages of T cell | Violet.450.50.MT.trait1 | CD45RA on naive CD4+ | GCST90002098 |
| MFI | Maturation stages of T cell | Violet.450.50.MT.trait2 | CD4RA on TD CD4+ | GCST90002099 |
| MFI | Maturation stages of T cell | Violet.450.50.MT.trait3 | CD45RA on naive CD8br | GCST90002100 |
| MFI | Maturation stages of T cell | Violet.450.50.MT.trait4 | CD45RA on TD CD8br | GCST90002101 |
| MFI | Treg | Violet.450.50.Treg.trait2 | CD45RA on resting Treg | GCST90002102 |
| MFI | Treg | Violet.450.50.Treg.trait3 | CD45RA on CD39+ resting Treg | GCST90002103 |
| MFI | cDC | Violet.510.50.cDC.trait2 | HLA-DR on myeloid DC | GCST90002104 |
| MFI | cDC | Violet.510.50.cDC.trait3 | HLA-DR on plasmacytoid DC | GCST90002105 |
| MFI | cDC | Violet.510.50.cDC.trait4 | HLA-DR on DC | GCST90002106 |
| MFI | Myeloid cell | Violet.510.50.MDSC.trait1 | HLA-DR on HSC | GCST90002107 |
| MFI | Myeloid cell | Violet.510.50.MDSC.trait3 | HLA-DR on CD33br HLA-DR+ CD14- | GCST90002108 |
| MFI | Myeloid cell | Violet.510.50.MDSC.trait4 | HLA-DR on CD33br HLA-DR+ CD14dim | GCST90002109 |
| MFI | Myeloid cell | Violet.510.50.MDSC.trait5 | HLA-DR on CD33dim HLA-DR+ CD11b+ | GCST90002110 |
| MFI | Myeloid cell | Violet.510.50.MDSC.trait6 | HLA-DR on CD33dim HLA-DR+ CD11b- | GCST90002111 |
| MFI | Myeloid cell | Violet.510.50.MDSC.trait7 | HLA-DR on CD33- HLA-DR+ | GCST90002112 |
| MFI | TBNK | Violet.510.50.TBNK.trait2 | HLA-DR on HLA-DR+ T cell | GCST90002113 |
| MFI | TBNK | Violet.510.50.TBNK.trait3 | HLA-DR on HLA-DR+ CD4+ | GCST90002114 |
| MFI | TBNK | Violet.510.50.TBNK.trait4 | HLA-DR on HLA-DR+ CD8br | GCST90002115 |
| MFI | TBNK | Violet.510.50.TBNK.trait5 | HLA-DR on B cell | GCST90002116 |
| MFI | TBNK | Violet.510.50.TBNK.trait6 | HLA-DR on HLA-DR+ NK | GCST90002117 |
| MFI | Treg | Violet.510.50.Treg.trait2 | CD8 on CD28+ CD45RA- CD8br | GCST90002118 |
| MFI | Treg | Violet.510.50.Treg.trait3 | CD8 on CD28+ CD45RA+ CD8br | GCST90002119 |
| MFI | Treg | Violet.510.50.Treg.trait4 | CD8 on CD28- CD8br | GCST90002120 |
| MFI | Treg | Violet.510.50.Treg.trait5 | CD8 on CD39+ CD8br | GCST90002121 |
| Relative count | B cell | BC_Trait1 | IgD+ %B cell | GCST90001391 |

| **S4 Table.** Clinical characteristics of patients in the MMRF, GSE136337, and GSE24080 cohorts. | | | | |
| --- | --- | --- | --- | --- |
| **Clinical Characteristic** | **MMRF Cohort (N=884)** | **GSE136337 (N=436)** | **GSE24080 (N=556)** | **P value** |
| Median age (years) | 63 (range:27-88) | 59.5 (range:32-75) | 55.5 (range:25-76) | 0.355 |
| Gender (Male/Female) | 430/414 | 261/175 | 309/247 | 0.416 |
| ISS Stage (I/II/III) | 260/287/297 | 170/135/131 | NA | 0.382 |

| **S5 Table.** List of all primers used in this study. | | |
| --- | --- | --- |
| **Name** | **Sequence (5'-3')** | **Sequence (5'-3')** |
| *PFDN2* | F-ATGAGCACAGCCTAGTGATCG | R-ACTCCTCCAACCATGCGGTA |
| *TUBA1B* | F-ACCTTAACCGCCTTATTAGCCA | R-CACCACGGTACAACAGGCA |
| *ERH* | F-GGCCAGAAGGCAGAACTTATG | R-GGGACTGTTGGGATTCATTCTT |
| *FAM49B* | F-CATGCACAGACCTTGAGCAG | R-ATTGCCTCTCGTATTTCGTGG |
| *HNRNPR* | F-GCAAGGTGCAAGAGTCCACA | R-CACGCCAGAGTACACACTGTC |
| *RHOC* | F-GGAGGTCTACGTCCCTACTGT | R-CGCAGTCGATCATAGTCTTCC |
| *ANAPC11* | F-GAGAACTGTGGCATCTGCAGGA | R-CAGCCACTTGAGGATGCAATGC |
| *IL32* | F-TGGCGGCTTATTATGAGGAGC | R-CTCGGCACCGTAATCCATCTC |
| *GLIPR2* | F-ATGGGCAAGTCAGCTTCCAAA | R-GCCTCAGAATACTGTTGAGCCT |
| *ZNF90* | F-GATCACCTGTCTGGAGCAAGGA | R-TGCTCTGGACAAAGGTCTTGGG |
| *YWHAZ* | F-CCTGCATGAAGTCTGTAACTGAG | R-GACCTACGGGCTCCTACAACA |
| *PECAM1* | F-AACAGTGTTGACATGAAGAGCC | R-TGTAAAACAGCACGTCATCCTT |
| *ENY2* | F-TGAGAGCAGCGATTAACCAAAA | R-AGTGTGCCTTCAACTGATCCT |
| *PSAP* | F-CCCGGTCCTTGGACTGAAAG | R-TATGTCGCAGGGAAGGGATTT |
| *SNRPC* | F-TGTGACTACTGCGATACATACCT | R-GCCTGCTCTTCCATCCATTTCT |
| *IL16* | F-GCCGAAGACCCTTGGGTTAG | R-GCTGGCATTGGGCTGTAGA |
| *PCGF5* | F-AGCCAACAACAGTGACGGAAT | R-TGAACTTGGTTGCCACACCTT |
| *ERP29* | F-CCTGGATACGGTCACTTTCTACA | R-AGTTTTCAGCAAGACGCTTGA |
| *GAPDH* | F-TCGGAGTCAACGGATTTGGT | R-TGGAATTTGCCATGGGTGGA |

| **S6 Table.** Top 10 DEGs for 13 immune cells. | | | | | | |
| --- | --- | --- | --- | --- | --- | --- |
|  | **p_val** | **avg_log2FC** | **pct.1** | **pct.2** | **p_val_adj** | **cluster** |
| LTB | 0 | 2.23016466 | 0.841 | 0.238 | 0 | CD4 cell |
| IL7R | 0 | 1.87790194 | 0.574 | 0.095 | 0 | CD4 cell |
| TRAC | 0 | 1.47996804 | 0.669 | 0.181 | 0 | CD4 cell |
| NOSIP | 0 | 1.35976384 | 0.475 | 0.199 | 0 | CD4 cell |
| MAL | 0 | 1.33124565 | 0.256 | 0.014 | 0 | CD4 cell |
| LDHB | 0 | 1.19271463 | 0.73 | 0.395 | 0 | CD4 cell |
| CD3E | 0 | 1.1629957 | 0.586 | 0.175 | 0 | CD4 cell |
| CD27 | 0 | 1.11119618 | 0.312 | 0.062 | 0 | CD4 cell |
| TCF7 | 0 | 1.09151526 | 0.315 | 0.076 | 0 | CD4 cell |
| TRBC2 | 0 | 1.05993287 | 0.505 | 0.203 | 0 | CD4 cell |
| S100A8 | 0 | 5.61083187 | 0.98 | 0.213 | 0 | CD14 monocyte |
| S100A9 | 0 | 5.58537469 | 0.988 | 0.222 | 0 | CD14 monocyte |
| S100A12 | 0 | 4.44078568 | 0.81 | 0.038 | 0 | CD14 monocyte |
| LYZ | 0 | 4.23505092 | 0.996 | 0.182 | 0 | CD14 monocyte |
| VCAN | 0 | 3.67702232 | 0.845 | 0.035 | 0 | CD14 monocyte |
| RP11-1143G9.4 | 0 | 3.63287846 | 0.833 | 0.068 | 0 | CD14 monocyte |
| FCN1 | 0 | 3.46799721 | 0.905 | 0.079 | 0 | CD14 monocyte |
| MNDA | 0 | 3.42162718 | 0.866 | 0.072 | 0 | CD14 monocyte |
| CSTA | 0 | 2.93214222 | 0.781 | 0.063 | 0 | CD14 monocyte |
| CTSS | 0 | 2.85525134 | 0.919 | 0.296 | 0 | CD14 monocyte |
| CCL5 | 0 | 2.72344197 | 0.926 | 0.19 | 0 | CD8 cell |
| GZMH | 0 | 2.31778535 | 0.531 | 0.08 | 0 | CD8 cell |
| GZMK | 0 | 2.21654161 | 0.358 | 0.035 | 0 | CD8 cell |
| TRGC2 | 0 | 2.03250966 | 0.373 | 0.037 | 0 | CD8 cell |
| CMC1 | 0 | 2.02841721 | 0.438 | 0.134 | 0 | CD8 cell |
| IL32 | 0 | 1.89421934 | 0.846 | 0.324 | 0 | CD8 cell |
| NKG7 | 0 | 1.85176106 | 0.893 | 0.216 | 0 | CD8 cell |
| GZMA | 0 | 1.81549958 | 0.73 | 0.144 | 0 | CD8 cell |
| AC092580.4 | 0 | 1.70708248 | 0.414 | 0.067 | 0 | CD8 cell |
| CST7 | 0 | 1.70619677 | 0.695 | 0.15 | 0 | CD8 cell |
| GNLY1 | 0 | 3.62049605 | 0.941 | 0.2 | 0 | NK cell |
| NKG71 | 0 | 3.29097474 | 0.999 | 0.264 | 0 | NK cell |
| GZMB | 0 | 3.2807648 | 0.871 | 0.094 | 0 | NK cell |
| PRF11 | 0 | 3.16690509 | 0.839 | 0.093 | 0 | NK cell |
| FGFBP21 | 0 | 2.96927083 | 0.718 | 0.065 | 0 | NK cell |
| KLRF1 | 0 | 2.95850929 | 0.762 | 0.037 | 0 | NK cell |
| SPON2 | 0 | 2.87184994 | 0.622 | 0.037 | 0 | NK cell |
| KLRD11 | 0 | 2.75323432 | 0.833 | 0.093 | 0 | NK cell |
| CST71 | 0 | 2.67134493 | 0.897 | 0.177 | 0 | NK cell |
| CLIC3 | 0 | 2.64871076 | 0.604 | 0.044 | 0 | NK cell |
| IGLL5 | 0 | 7.42258003 | 0.894 | 0.036 | 0 | Plasma |
| MZB1 | 0 | 5.68693244 | 0.929 | 0.088 | 0 | Plasma |
| IGLV2-8 | 0 | 5.43134771 | 0.886 | 0.048 | 0 | Plasma |
| IGLC2 | 0 | 5.36348603 | 0.896 | 0.101 | 0 | Plasma |
| IGHA1 | 0 | 4.31706438 | 0.884 | 0.133 | 0 | Plasma |
| JCHAIN | 0 | 4.29081068 | 0.839 | 0.116 | 0 | Plasma |
| IFI27 | 0 | 3.73878083 | 0.741 | 0.028 | 0 | Plasma |
| MTDH | 0 | 3.71025926 | 0.947 | 0.319 | 0 | Plasma |
| SEC11C | 0 | 3.51282699 | 0.886 | 0.12 | 0 | Plasma |
| HSP90B1 | 0 | 3.37600835 | 0.937 | 0.343 | 0 | Plasma |
| IGLC31 | 0 | 4.14403544 | 0.448 | 0.059 | 0 | B cell |
| CD79A | 0 | 3.58229164 | 0.814 | 0.027 | 0 | B cell |
| IGHM | 0 | 3.3356763 | 0.637 | 0.022 | 0 | B cell |
| MS4A1 | 0 | 3.29439139 | 0.701 | 0.01 | 0 | B cell |
| CD79B | 0 | 3.16623538 | 0.8 | 0.097 | 0 | B cell |
| TCL1A | 0 | 2.96810055 | 0.454 | 0.011 | 0 | B cell |
| IGHD | 0 | 2.63078888 | 0.477 | 0.009 | 0 | B cell |
| CD741 | 0 | 2.37749307 | 0.995 | 0.578 | 0 | B cell |
| VPREB3 | 0 | 2.17498039 | 0.445 | 0.015 | 0 | B cell |
| LINC00926 | 0 | 2.16700989 | 0.45 | 0.005 | 0 | B cell |
| KIAA0101 | 0 | 2.42377908 | 0.697 | 0.037 | 0 | Hematopoietic stem cell |
| AHSP | 0 | 2.24506128 | 0.442 | 0.056 | 0 | Hematopoietic stem cell |
| STMN1 | 0 | 2.21856464 | 0.869 | 0.106 | 0 | Hematopoietic stem cell |
| TUBA1B | 0 | 2.12629119 | 0.87 | 0.275 | 0 | Hematopoietic stem cell |
| CA1 | 0 | 2.06698407 | 0.397 | 0.042 | 0 | Hematopoietic stem cell |
| HIST1H4C | 0 | 2.06283698 | 0.637 | 0.113 | 0 | Hematopoietic stem cell |
| HBB | 0 | 1.95638621 | 0.818 | 0.315 | 0 | Hematopoietic stem cell |
| SPINK2 | 0 | 1.93933938 | 0.35 | 0.01 | 0 | Hematopoietic stem cell |
| PRDX2 | 0 | 1.87655719 | 0.652 | 0.206 | 0 | Hematopoietic stem cell |
| RP11-620J15.3 | 0 | 1.84764554 | 0.711 | 0.036 | 0 | Hematopoietic stem cell |
| LST11 | 0 | 3.52273756 | 0.993 | 0.277 | 0 | CD16 monocyte |
| FCGR3A1 | 0 | 3.29991473 | 0.923 | 0.096 | 0 | CD16 monocyte |
| IFITM31 | 0 | 3.23833392 | 0.899 | 0.142 | 0 | CD16 monocyte |
| AIF11 | 0 | 3.12344125 | 0.994 | 0.291 | 0 | CD16 monocyte |
| MS4A7 | 0 | 3.08367526 | 0.858 | 0.056 | 0 | CD16 monocyte |
| SAT11 | 0 | 2.7675653 | 0.997 | 0.403 | 0 | CD16 monocyte |
| CFD1 | 0 | 2.71970913 | 0.895 | 0.158 | 0 | CD16 monocyte |
| LINC012721 | 0 | 2.69188658 | 0.787 | 0.054 | 0 | CD16 monocyte |
| LYPD2 | 0 | 2.66030885 | 0.282 | 0.001 | 0 | CD16 monocyte |
| FCER1G2 | 0 | 2.63422862 | 0.993 | 0.307 | 0 | CD16 monocyte |
| IRF81 | 0 | 3.38603361 | 0.859 | 0.068 | 0 | pDC |
| TCF42 | 0 | 3.0861923 | 0.837 | 0.087 | 0 | pDC |
| LILRA4 | 0 | 3.05839486 | 0.755 | 0.007 | 0 | pDC |
| IRF7 | 0 | 3.01920095 | 0.803 | 0.103 | 0 | pDC |
| PLD4 | 0 | 2.99963014 | 0.752 | 0.031 | 0 | pDC |
| CCDC50 | 0 | 2.96038482 | 0.806 | 0.063 | 0 | pDC |
| ITM2C1 | 0 | 2.88359027 | 0.806 | 0.082 | 0 | pDC |
| JCHAIN1 | 0 | 2.80576688 | 0.956 | 0.143 | 0 | pDC |
| SERPINF1 | 0 | 2.76784161 | 0.636 | 0.007 | 0 | pDC |
| UGCG | 0 | 2.53623289 | 0.702 | 0.044 | 0 | pDC |
| FCER1A1 | 0 | 3.14680376 | 0.818 | 0.035 | 0 | mDC |
| HLA-DQA12 | 0 | 3.07727848 | 0.879 | 0.119 | 0 | mDC |
| CD1C | 0 | 2.27178412 | 0.547 | 0.013 | 0 | mDC |
| CLEC10A | 0 | 2.17164096 | 0.625 | 0.015 | 0 | mDC |
| CD1E | 0 | 1.23889999 | 0.274 | 0.001 | 0 | mDC |
| ENHO | 0 | 1.10538791 | 0.384 | 0.003 | 0 | mDC |
| PKIB | 0 | 0.97219466 | 0.306 | 0.003 | 0 | mDC |
| NDRG2 | 0 | 0.75906819 | 0.329 | 0.008 | 0 | mDC |
| FLT3 | 2.32E-299 | 0.7559681 | 0.336 | 0.019 | 4.07E-295 | mDC |
| HLA-DMB3 | 2.93E-292 | 1.57083833 | 0.782 | 0.105 | 5.15E-288 | mDC |
| IGLL11 | 0 | 4.77359034 | 0.958 | 0.047 | 0 | pre-B cell |
| DNTT | 0 | 4.25333876 | 0.649 | 0.01 | 0 | pre-B cell |
| VPREB1 | 0 | 4.09458928 | 0.917 | 0.009 | 0 | pre-B cell |
| VPREB31 | 0 | 3.85337185 | 0.885 | 0.026 | 0 | pre-B cell |
| CD79B1 | 0 | 3.18154375 | 0.927 | 0.122 | 0 | pre-B cell |
| CD241 | 0 | 2.83398199 | 0.722 | 0.018 | 0 | pre-B cell |
| CD9 | 0 | 2.63321733 | 0.486 | 0.028 | 0 | pre-B cell |
| SOX42 | 0 | 2.50863436 | 0.774 | 0.091 | 0 | pre-B cell |
| AKAP12 | 0 | 1.99233365 | 0.417 | 0.005 | 0 | pre-B cell |
| CMTM8 | 0 | 1.9428048 | 0.483 | 0.013 | 0 | pre-B cell |
| HBM | 0 | 6.82059276 | 1 | 0.072 | 0 | Hematopoietic progenitor cell |
| HBD1 | 0 | 6.15403681 | 0.995 | 0.111 | 0 | Hematopoietic progenitor cell |
| AHSP1 | 0 | 5.44331444 | 1 | 0.083 | 0 | Hematopoietic progenitor cell |
| CA11 | 0 | 5.20032393 | 0.932 | 0.067 | 0 | Hematopoietic progenitor cell |
| SLC4A1 | 0 | 4.58706074 | 0.985 | 0.016 | 0 | Hematopoietic progenitor cell |
| GYPA | 0 | 4.36421778 | 0.971 | 0.021 | 0 | Hematopoietic progenitor cell |
| GYPB | 0 | 4.28470587 | 0.951 | 0.017 | 0 | Hematopoietic progenitor cell |
| SLC25A37 | 0 | 4.0951512 | 0.98 | 0.102 | 0 | Hematopoietic progenitor cell |
| HEMGN | 0 | 3.93290606 | 0.956 | 0.027 | 0 | Hematopoietic progenitor cell |
| CA21 | 0 | 3.88991976 | 0.941 | 0.041 | 0 | Hematopoietic progenitor cell |
| IGHG3 | 0 | 7.85242303 | 0.992 | 0.08 | 0 | Plasmablast |
| IGHG4 | 0 | 6.89000036 | 0.977 | 0.073 | 0 | Plasmablast |
| IGHG1 | 0 | 6.80398276 | 1 | 0.073 | 0 | Plasmablast |
| IGKV1-12 | 0 | 1.48265821 | 0.447 | 0.004 | 0 | Plasmablast |
| IGHG2 | 0 | 1.42950277 | 0.402 | 0.006 | 0 | Plasmablast |
| CYP4F35P | 0 | 1.42791507 | 0.394 | 0.008 | 0 | Plasmablast |
| HGF | 0 | 1.28798923 | 0.417 | 0.011 | 0 | Plasmablast |
| ANKRD20A4 | 0 | 1.05725967 | 0.273 | 0.004 | 0 | Plasmablast |
| MEIS2 | 0 | 0.93703462 | 0.288 | 0.001 | 0 | Plasmablast |
| NAALADL2-AS2 | 0 | 0.9043154 | 0.273 | 0 | 0 | Plasmablast |

| **S7 Table.** MoDEGs of MM and NBM. (padj<0.05) | | | | | | |
| --- | --- | --- | --- | --- | --- | --- |
| **gene_name** | **baseMean** | **log2FoldChange** | **lfcSE** | **stat** | **pvalue** | **padj** |
| CD74 | 8.152 | 1.789 | 0.047 | 38.280 | 0.00E+00 | 0.00E+00 |
| B2M | 33.470 | 1.315 | 0.037 | 35.898 | 3.23E-282 | 5.25E-279 |
| CD52 | 5.051 | 1.419 | 0.045 | 31.756 | 2.65E-221 | 2.88E-218 |
| HLA-DRA | 9.221 | 1.519 | 0.049 | 30.850 | 5.56E-209 | 4.53E-206 |
| TMSB10 | 20.206 | 0.961 | 0.031 | 30.638 | 3.78E-206 | 2.46E-203 |
| HLA-DRB5 | 2.648 | 1.570 | 0.051 | 30.615 | 7.83E-206 | 4.25E-203 |
| CALM2 | 4.033 | 1.215 | 0.041 | 29.951 | 4.23E-197 | 1.97E-194 |
| CST3 | 8.690 | 1.105 | 0.038 | 29.229 | 8.30E-188 | 3.38E-185 |
| MT-CO2 | 32.770 | 0.896 | 0.031 | 28.610 | 5.02E-180 | 1.82E-177 |
| PFN1 | 6.010 | 1.048 | 0.038 | 27.901 | 2.56E-171 | 8.35E-169 |
| FTL | 38.355 | 0.992 | 0.036 | 27.802 | 4.06E-170 | 1.20E-167 |
| MALAT1 | 101.216 | 0.948 | 0.035 | 27.445 | 7.93E-166 | 2.15E-163 |
| HLA-B | 8.130 | 1.067 | 0.039 | 27.364 | 7.28E-165 | 1.82E-162 |
| PSAP | 4.868 | 1.007 | 0.037 | 27.360 | 8.18E-165 | 1.90E-162 |
| IGKC | 2.506 | 1.607 | 0.059 | 27.340 | 1.44E-164 | 3.12E-162 |
| HLA-DRB1 | 4.670 | 1.231 | 0.047 | 26.084 | 5.57E-150 | 1.13E-147 |
| HLA-A | 4.187 | 0.987 | 0.039 | 25.467 | 4.54E-143 | 8.70E-141 |
| CRIP1 | 2.733 | 1.320 | 0.052 | 25.286 | 4.57E-141 | 8.27E-139 |
| NEAT1 | 9.186 | 0.907 | 0.036 | 25.178 | 7.05E-140 | 1.21E-137 |
| MT-CO1 | 43.766 | 0.841 | 0.033 | 25.154 | 1.27E-139 | 2.07E-137 |
| ACTB | 23.606 | 0.915 | 0.036 | 25.149 | 1.45E-139 | 2.25E-137 |
| IFITM3 | 2.534 | 1.333 | 0.054 | 24.653 | 3.40E-134 | 5.03E-132 |
| LY6E | 1.945 | 1.129 | 0.046 | 24.313 | 1.41E-130 | 2.00E-128 |
| EMP3 | 3.195 | 0.953 | 0.040 | 23.980 | 4.45E-127 | 6.03E-125 |
| HBA2 | 2.712 | 1.304 | 0.055 | 23.701 | 3.48E-124 | 4.54E-122 |
| TMSB4X | 45.865 | 0.798 | 0.034 | 23.425 | 2.38E-121 | 2.98E-119 |
| HLA-DPA1 | 3.232 | 1.187 | 0.051 | 23.270 | 8.84E-120 | 1.07E-117 |
| S100A11 | 5.116 | 0.884 | 0.038 | 23.235 | 2.03E-119 | 2.36E-117 |
| HLA-C | 4.211 | 0.987 | 0.043 | 23.027 | 2.52E-117 | 2.83E-115 |
| RPS19 | 12.761 | 0.917 | 0.040 | 22.821 | 2.81E-115 | 3.05E-113 |
| CTSS | 7.823 | 0.832 | 0.037 | 22.704 | 4.11E-114 | 4.32E-112 |
| RPL41 | 18.599 | 0.784 | 0.036 | 21.893 | 3.04E-106 | 3.09E-104 |
| RPS29 | 11.071 | 0.831 | 0.038 | 21.733 | 9.95E-105 | 9.82E-103 |
| AIF1 | 5.514 | 0.890 | 0.043 | 20.879 | 8.39E-97 | 8.04E-95 |
| IFI6 | 1.748 | 0.980 | 0.047 | 20.858 | 1.29E-96 | 1.20E-94 |
| PTPRC | 2.599 | 0.807 | 0.039 | 20.771 | 7.98E-96 | 7.22E-94 |
| TXNIP | 2.798 | 0.861 | 0.042 | 20.688 | 4.45E-95 | 3.91E-93 |
| FCN1 | 5.487 | 0.767 | 0.038 | 20.434 | 8.26E-93 | 7.08E-91 |
| TYMP | 2.718 | 0.804 | 0.039 | 20.379 | 2.59E-92 | 2.17E-90 |
| TYROBP | 9.345 | 0.665 | 0.033 | 20.363 | 3.53E-92 | 2.88E-90 |
| HLA-E | 2.462 | 0.851 | 0.042 | 20.289 | 1.61E-91 | 1.28E-89 |
| LST1 | 6.091 | 0.883 | 0.044 | 20.157 | 2.34E-90 | 1.82E-88 |
| ITM2B | 3.388 | 0.780 | 0.039 | 19.976 | 8.89E-89 | 6.73E-87 |
| HLA-DQB1 | 2.005 | 0.888 | 0.045 | 19.924 | 2.50E-88 | 1.85E-86 |
| NPC2 | 3.259 | 0.742 | 0.038 | 19.731 | 1.16E-86 | 8.41E-85 |
| SH3BGRL3 | 6.420 | 0.677 | 0.035 | 19.599 | 1.58E-85 | 1.12E-83 |
| S100A12 | 5.566 | (0.985) | 0.051 | (19.396) | 8.35E-84 | 5.79E-82 |
| CFL1 | 4.272 | 0.708 | 0.037 | 19.293 | 6.16E-83 | 4.18E-81 |
| JUNB | 2.776 | 0.801 | 0.042 | 19.251 | 1.39E-82 | 9.23E-81 |
| HLA-DPB1 | 3.258 | 0.951 | 0.050 | 19.123 | 1.64E-81 | 1.07E-79 |
| RPL36 | 8.352 | 0.641 | 0.034 | 19.094 | 2.81E-81 | 1.79E-79 |
| COTL1 | 3.258 | 0.734 | 0.038 | 19.089 | 3.12E-81 | 1.96E-79 |
| ISG15 | 1.818 | 0.918 | 0.050 | 18.483 | 2.81E-76 | 1.73E-74 |
| SERF2 | 5.786 | 0.570 | 0.031 | 18.453 | 4.91E-76 | 2.96E-74 |
| FCER1G | 5.612 | 0.742 | 0.040 | 18.451 | 5.16E-76 | 3.06E-74 |
| SPI1 | 2.125 | 0.734 | 0.041 | 17.912 | 9.48E-72 | 5.51E-70 |
| MT-CYB | 13.732 | 0.594 | 0.033 | 17.857 | 2.56E-71 | 1.46E-69 |
| CYBA | 6.505 | 0.588 | 0.033 | 17.826 | 4.47E-71 | 2.51E-69 |
| PFDN5 | 5.003 | 0.580 | 0.033 | 17.709 | 3.60E-70 | 1.99E-68 |
| S100A4 | 13.998 | 0.595 | 0.034 | 17.621 | 1.70E-69 | 9.23E-68 |
| RPS28 | 11.399 | 0.612 | 0.035 | 17.554 | 5.56E-69 | 2.97E-67 |
| RPL31 | 5.663 | 0.634 | 0.036 | 17.508 | 1.24E-68 | 6.54E-67 |
| IGLV2-8 | 1.269 | 0.858 | 0.050 | 17.290 | 5.60E-67 | 2.89E-65 |
| SERPINA1 | 2.551 | 0.731 | 0.043 | 17.093 | 1.66E-65 | 8.47E-64 |
| CCL3 | 1.454 | 0.860 | 0.051 | 16.919 | 3.26E-64 | 1.64E-62 |
| IFITM2 | 2.344 | 0.855 | 0.051 | 16.896 | 4.81E-64 | 2.37E-62 |
| NCF1 | 1.994 | 0.694 | 0.041 | 16.895 | 4.90E-64 | 2.38E-62 |
| MYL12A | 2.923 | 0.619 | 0.037 | 16.835 | 1.36E-63 | 6.50E-62 |
| TAGLN2 | 1.816 | 0.689 | 0.042 | 16.514 | 2.92E-61 | 1.38E-59 |
| OAZ1 | 6.123 | 0.563 | 0.035 | 16.327 | 6.30E-60 | 2.93E-58 |
| HLA-DMA | 1.742 | 0.707 | 0.043 | 16.282 | 1.33E-59 | 6.11E-58 |
| FGL2 | 2.275 | 0.630 | 0.039 | 16.027 | 8.24E-58 | 3.73E-56 |
| COX6B1 | 2.701 | 0.555 | 0.035 | 15.995 | 1.38E-57 | 6.15E-56 |
| CFD | 2.809 | 0.664 | 0.042 | 15.964 | 2.28E-57 | 1.00E-55 |
| RPL29 | 6.072 | 0.569 | 0.036 | 15.847 | 1.47E-56 | 6.37E-55 |
| UBC | 2.484 | 0.621 | 0.039 | 15.824 | 2.11E-56 | 9.05E-55 |
| MT-ND4 | 20.303 | 0.487 | 0.031 | 15.678 | 2.14E-55 | 9.04E-54 |
| S100A6 | 15.021 | 0.480 | 0.031 | 15.614 | 5.86E-55 | 2.45E-53 |
| RPS9 | 8.317 | 0.528 | 0.034 | 15.566 | 1.24E-54 | 5.12E-53 |
| RPS27 | 18.006 | 0.582 | 0.038 | 15.506 | 3.16E-54 | 1.28E-52 |
| MT-ND2 | 15.038 | 0.491 | 0.032 | 15.371 | 2.56E-53 | 1.03E-51 |
| LSP1 | 2.189 | 0.603 | 0.039 | 15.366 | 2.75E-53 | 1.09E-51 |
| ARPC5 | 2.147 | 0.590 | 0.039 | 15.187 | 4.34E-52 | 1.70E-50 |
| RPL38 | 5.929 | 0.529 | 0.035 | 15.181 | 4.75E-52 | 1.84E-50 |
| ZEB2 | 1.983 | 0.607 | 0.040 | 15.090 | 1.87E-51 | 7.18E-50 |
| RPL28 | 14.190 | 0.512 | 0.034 | 15.031 | 4.59E-51 | 1.74E-49 |
| MYL6 | 4.033 | 0.548 | 0.037 | 15.001 | 7.25E-51 | 2.71E-49 |
| FCGR3A | 1.955 | 0.858 | 0.058 | 14.888 | 3.92E-50 | 1.45E-48 |
| S100A10 | 4.721 | 0.585 | 0.040 | 14.794 | 1.60E-49 | 5.84E-48 |
| TIMP1 | 2.349 | 0.645 | 0.044 | 14.772 | 2.20E-49 | 7.98E-48 |
| PSME2 | 1.635 | 0.634 | 0.044 | 14.412 | 4.34E-47 | 1.55E-45 |
| CORO1A | 2.731 | 0.549 | 0.039 | 14.229 | 6.06E-46 | 2.14E-44 |
| EVI2B | 2.245 | 0.542 | 0.039 | 14.056 | 7.04E-45 | 2.47E-43 |
| RPS15 | 10.140 | 0.462 | 0.033 | 14.037 | 9.31E-45 | 3.22E-43 |
| MNDA | 4.337 | 0.522 | 0.037 | 14.019 | 1.19E-44 | 4.06E-43 |
| RPL34 | 24.239 | 0.424 | 0.030 | 13.998 | 1.61E-44 | 5.45E-43 |
| GRN | 2.285 | 0.521 | 0.037 | 13.971 | 2.36E-44 | 7.92E-43 |
| CSTB | 2.028 | 0.577 | 0.041 | 13.951 | 3.09E-44 | 1.03E-42 |
| COX5B | 2.178 | 0.532 | 0.038 | 13.937 | 3.75E-44 | 1.23E-42 |
| ARPC1B | 2.682 | 0.509 | 0.037 | 13.787 | 3.05E-43 | 9.92E-42 |
| ALDOA | 2.526 | 0.516 | 0.038 | 13.684 | 1.26E-42 | 4.07E-41 |
| RPS2 | 10.209 | 0.538 | 0.039 | 13.683 | 1.29E-42 | 4.11E-41 |
| RPL15 | 6.634 | 0.518 | 0.038 | 13.679 | 1.36E-42 | 4.30E-41 |
| CLIC1 | 2.111 | 0.529 | 0.039 | 13.631 | 2.62E-42 | 8.21E-41 |
| RNASET2 | 1.789 | 0.589 | 0.043 | 13.576 | 5.60E-42 | 1.74E-40 |
| IFI27 | 1.226 | 0.703 | 0.052 | 13.534 | 9.80E-42 | 3.01E-40 |
| LYZ | 26.295 | (0.630) | 0.047 | (13.394) | 6.58E-41 | 2.00E-39 |
| APOBEC3A | 1.467 | 0.614 | 0.046 | 13.273 | 3.30E-40 | 9.95E-39 |
| PRELID1 | 2.108 | 0.531 | 0.040 | 13.220 | 6.71E-40 | 2.01E-38 |
| CD68 | 1.749 | 0.574 | 0.043 | 13.218 | 6.89E-40 | 2.04E-38 |
| RPL11 | 9.838 | 0.465 | 0.035 | 13.217 | 7.03E-40 | 2.06E-38 |
| RPS18 | 12.897 | 0.478 | 0.036 | 13.195 | 9.36E-40 | 2.72E-38 |
| FTH1 | 21.145 | 0.615 | 0.047 | 13.181 | 1.12E-39 | 3.24E-38 |
| UQCR11 | 2.576 | 0.462 | 0.035 | 13.112 | 2.81E-39 | 8.02E-38 |
| RPL8 | 7.051 | 0.463 | 0.035 | 13.088 | 3.86E-39 | 1.09E-37 |
| RPL18A | 10.895 | 0.456 | 0.035 | 13.052 | 6.17E-39 | 1.73E-37 |
| ANXA2 | 2.206 | 0.504 | 0.039 | 13.003 | 1.17E-38 | 3.27E-37 |
| VAMP8 | 2.176 | 0.500 | 0.038 | 12.995 | 1.31E-38 | 3.63E-37 |
| PTP4A2 | 1.917 | 0.519 | 0.040 | 12.985 | 1.48E-38 | 4.06E-37 |
| PPDPF | 2.190 | 0.520 | 0.040 | 12.904 | 4.29E-38 | 1.16E-36 |
| DDX5 | 3.296 | 0.456 | 0.036 | 12.830 | 1.12E-37 | 3.02E-36 |
| RPS27L | 1.902 | 0.523 | 0.041 | 12.782 | 2.07E-37 | 5.52E-36 |
| RHOA | 2.762 | 0.453 | 0.036 | 12.740 | 3.54E-37 | 9.37E-36 |
| RPL36AL | 2.266 | 0.487 | 0.038 | 12.720 | 4.60E-37 | 1.21E-35 |
| FXYD5 | 2.085 | 0.501 | 0.040 | 12.631 | 1.42E-36 | 3.70E-35 |
| RPL36A | 5.301 | 0.494 | 0.040 | 12.504 | 7.09E-36 | 1.83E-34 |
| ARPC3 | 2.986 | 0.484 | 0.039 | 12.485 | 8.99E-36 | 2.31E-34 |
| CD14 | 2.221 | 0.505 | 0.041 | 12.435 | 1.69E-35 | 4.31E-34 |
| MS4A7 | 1.762 | 0.586 | 0.047 | 12.374 | 3.60E-35 | 9.09E-34 |
| PSME1 | 1.941 | 0.510 | 0.041 | 12.356 | 4.52E-35 | 1.13E-33 |
| RPS25 | 5.983 | 0.455 | 0.037 | 12.353 | 4.67E-35 | 1.16E-33 |
| COX6C | 2.303 | 0.465 | 0.038 | 12.348 | 5.01E-35 | 1.24E-33 |
| AREG | 1.197 | (0.591) | 0.048 | (12.313) | 7.70E-35 | 1.88E-33 |
| YBX1 | 2.671 | 0.486 | 0.040 | 12.254 | 1.61E-34 | 3.91E-33 |
| RPL27A | 9.165 | 0.441 | 0.036 | 12.237 | 1.96E-34 | 4.74E-33 |
| RPL35 | 7.137 | 0.411 | 0.034 | 12.084 | 1.28E-33 | 3.06E-32 |
| ITGB2 | 2.215 | 0.478 | 0.040 | 12.048 | 2.00E-33 | 4.74E-32 |
| PTMA | 8.960 | 0.423 | 0.035 | 12.023 | 2.69E-33 | 6.36E-32 |
| HMGB2 | 1.926 | (0.469) | 0.039 | (11.928) | 8.47E-33 | 1.98E-31 |
| LIMD2 | 1.740 | 0.520 | 0.044 | 11.912 | 1.03E-32 | 2.39E-31 |
| HLA-DQA1 | 1.491 | 0.568 | 0.048 | 11.898 | 1.21E-32 | 2.80E-31 |
| LIPA | 1.369 | 0.561 | 0.047 | 11.873 | 1.63E-32 | 3.74E-31 |
| CTSD | 2.233 | 0.438 | 0.037 | 11.836 | 2.54E-32 | 5.78E-31 |
| IFI44L | 1.239 | 0.578 | 0.049 | 11.812 | 3.40E-32 | 7.70E-31 |
| FKBP1A | 2.422 | 0.433 | 0.037 | 11.729 | 9.08E-32 | 2.04E-30 |
| RPL14 | 5.458 | 0.436 | 0.037 | 11.696 | 1.34E-31 | 2.98E-30 |
| THBS1 | 1.293 | (0.534) | 0.046 | (11.677) | 1.67E-31 | 3.71E-30 |
| AHNAK | 1.923 | 0.472 | 0.040 | 11.666 | 1.90E-31 | 4.18E-30 |
| LAPTM5 | 2.439 | 0.429 | 0.037 | 11.533 | 9.02E-31 | 1.97E-29 |
| MS4A6A | 2.765 | 0.447 | 0.039 | 11.496 | 1.38E-30 | 3.00E-29 |
| CD37 | 2.071 | 0.463 | 0.040 | 11.471 | 1.85E-30 | 3.99E-29 |
| C10orf54 | 1.987 | 0.468 | 0.041 | 11.464 | 2.01E-30 | 4.30E-29 |
| UBB | 1.767 | 0.488 | 0.043 | 11.420 | 3.33E-30 | 7.10E-29 |
| RPS21 | 4.890 | 0.412 | 0.036 | 11.376 | 5.51E-30 | 1.16E-28 |
| MT-ND1 | 10.151 | 0.387 | 0.034 | 11.363 | 6.41E-30 | 1.35E-28 |
| GNB2L1 | 4.373 | 0.410 | 0.036 | 11.303 | 1.27E-29 | 2.66E-28 |
| GSTP1 | 3.071 | 0.404 | 0.036 | 11.276 | 1.72E-29 | 3.57E-28 |
| NFKBIZ | 1.513 | 0.505 | 0.045 | 11.257 | 2.13E-29 | 4.40E-28 |
| RPS15A | 14.071 | 0.403 | 0.036 | 11.232 | 2.84E-29 | 5.81E-28 |
| ANXA1 | 3.090 | 0.436 | 0.039 | 11.231 | 2.86E-29 | 5.83E-28 |
| MAP3K8 | 1.397 | (0.494) | 0.044 | (11.194) | 4.38E-29 | 8.85E-28 |
| PPIA | 2.783 | 0.407 | 0.036 | 11.175 | 5.39E-29 | 1.08E-27 |
| ZFP36L1 | 1.683 | 0.484 | 0.043 | 11.164 | 6.15E-29 | 1.23E-27 |
| HBB | 3.161 | 0.620 | 0.056 | 11.126 | 9.35E-29 | 1.86E-27 |
| ATP5J2 | 1.849 | 0.454 | 0.041 | 11.084 | 1.50E-28 | 2.96E-27 |
| PYCARD | 2.166 | 0.425 | 0.038 | 11.084 | 1.51E-28 | 2.96E-27 |
| GMFG | 2.609 | 0.392 | 0.036 | 11.004 | 3.65E-28 | 7.12E-27 |
| LGALS2 | 1.721 | 0.491 | 0.045 | 11.002 | 3.74E-28 | 7.26E-27 |
| ATP5I | 2.405 | 0.401 | 0.036 | 10.988 | 4.36E-28 | 8.39E-27 |
| CDC42 | 2.333 | 0.415 | 0.038 | 10.982 | 4.68E-28 | 8.97E-27 |
| SAT1 | 6.336 | 0.478 | 0.044 | 10.932 | 8.12E-28 | 1.55E-26 |
| RPS4Y1 | 1.687 | 0.460 | 0.042 | 10.902 | 1.12E-27 | 2.12E-26 |
| RPL37 | 8.668 | 0.397 | 0.036 | 10.902 | 1.13E-27 | 2.12E-26 |
| PSMB9 | 1.582 | 0.489 | 0.045 | 10.891 | 1.27E-27 | 2.37E-26 |
| ARHGDIB | 2.555 | 0.409 | 0.038 | 10.882 | 1.41E-27 | 2.62E-26 |
| ATP5G2 | 3.408 | 0.368 | 0.034 | 10.862 | 1.75E-27 | 3.24E-26 |
| CTSC | 1.534 | 0.492 | 0.046 | 10.822 | 2.71E-27 | 4.99E-26 |
| CFP | 1.966 | 0.437 | 0.041 | 10.799 | 3.50E-27 | 6.40E-26 |
| RPL18 | 5.803 | 0.377 | 0.035 | 10.757 | 5.50E-27 | 1.00E-25 |
| DRAP1 | 1.580 | 0.485 | 0.045 | 10.736 | 6.93E-27 | 1.25E-25 |
| MYL12B | 2.182 | 0.414 | 0.039 | 10.696 | 1.06E-26 | 1.91E-25 |
| RPL23A | 5.931 | 0.412 | 0.039 | 10.696 | 1.07E-26 | 1.91E-25 |
| GPX4 | 2.066 | 0.418 | 0.039 | 10.671 | 1.40E-26 | 2.49E-25 |
| RPL10 | 19.376 | 0.417 | 0.039 | 10.625 | 2.29E-26 | 4.05E-25 |
| ARPC2 | 2.909 | 0.412 | 0.039 | 10.597 | 3.09E-26 | 5.44E-25 |
| S100A9 | 39.056 | (0.568) | 0.054 | (10.499) | 8.69E-26 | 1.52E-24 |
| RPL4 | 3.122 | 0.395 | 0.038 | 10.415 | 2.11E-25 | 3.68E-24 |
| COX7C | 3.212 | 0.365 | 0.035 | 10.400 | 2.49E-25 | 4.32E-24 |
| FYB | 1.935 | 0.421 | 0.041 | 10.389 | 2.77E-25 | 4.77E-24 |
| CD53 | 1.776 | 0.437 | 0.042 | 10.384 | 2.94E-25 | 5.03E-24 |
| RAC1 | 1.599 | 0.441 | 0.042 | 10.377 | 3.16E-25 | 5.39E-24 |
| HCST | 2.473 | 0.379 | 0.037 | 10.354 | 4.02E-25 | 6.82E-24 |
| F13A1 | 1.323 | 0.499 | 0.048 | 10.352 | 4.09E-25 | 6.90E-24 |
| PTPN6 | 1.562 | 0.469 | 0.045 | 10.339 | 4.71E-25 | 7.90E-24 |
| MT-CO3 | 24.637 | 0.315 | 0.031 | 10.270 | 9.66E-25 | 1.61E-23 |
| RPL12 | 9.711 | 0.354 | 0.035 | 10.219 | 1.63E-24 | 2.71E-23 |
| RHOG | 1.697 | 0.445 | 0.044 | 10.210 | 1.78E-24 | 2.94E-23 |
| SLC25A6 | 3.085 | 0.391 | 0.038 | 10.209 | 1.80E-24 | 2.97E-23 |
| TMA7 | 2.568 | 0.365 | 0.036 | 10.160 | 2.99E-24 | 4.90E-23 |
| RPL37A | 8.743 | 0.370 | 0.037 | 10.136 | 3.81E-24 | 6.20E-23 |
| KLF6 | 2.103 | 0.399 | 0.040 | 10.052 | 8.99E-24 | 1.46E-22 |
| PET100 | 1.729 | 0.429 | 0.043 | 9.983 | 1.82E-23 | 2.93E-22 |
| IER2 | 1.770 | 0.428 | 0.043 | 9.923 | 3.31E-23 | 5.32E-22 |
| S100A8 | 37.443 | (0.575) | 0.058 | (9.884) | 4.90E-23 | 7.83E-22 |
| TCEB2 | 2.871 | 0.326 | 0.033 | 9.880 | 5.06E-23 | 8.04E-22 |
| RPS14 | 11.913 | 0.319 | 0.032 | 9.875 | 5.33E-23 | 8.43E-22 |
| GPSM3 | 1.764 | 0.421 | 0.043 | 9.841 | 7.46E-23 | 1.17E-21 |
| RPS10 | 3.730 | 0.375 | 0.038 | 9.836 | 7.87E-23 | 1.23E-21 |
| GAPDH | 5.215 | 0.370 | 0.038 | 9.707 | 2.83E-22 | 4.41E-21 |
| RETN | 1.486 | (0.427) | 0.044 | (9.697) | 3.11E-22 | 4.82E-21 |
| TPI1 | 2.053 | 0.378 | 0.039 | 9.642 | 5.31E-22 | 8.19E-21 |
| LCP1 | 2.391 | 0.350 | 0.036 | 9.604 | 7.67E-22 | 1.18E-20 |
| CD44 | 2.415 | 0.346 | 0.036 | 9.561 | 1.17E-21 | 1.79E-20 |
| IFI30 | 1.676 | 0.417 | 0.044 | 9.497 | 2.16E-21 | 3.28E-20 |
| RPL13A | 13.831 | 0.331 | 0.035 | 9.492 | 2.27E-21 | 3.43E-20 |
| UBL5 | 2.044 | 0.371 | 0.039 | 9.425 | 4.32E-21 | 6.51E-20 |
| COX6A1 | 1.785 | 0.391 | 0.042 | 9.381 | 6.51E-21 | 9.77E-20 |
| RBX1 | 1.727 | 0.398 | 0.042 | 9.370 | 7.26E-21 | 1.08E-19 |
| TMEM258 | 1.791 | 0.387 | 0.042 | 9.291 | 1.53E-20 | 2.28E-19 |
| CCL4 | 1.176 | 0.459 | 0.050 | 9.265 | 1.96E-20 | 2.90E-19 |
| GPX1 | 4.667 | 0.348 | 0.038 | 9.201 | 3.54E-20 | 5.22E-19 |
| FLNA | 1.678 | 0.397 | 0.043 | 9.190 | 3.93E-20 | 5.77E-19 |
| MT-ND3 | 17.307 | 0.276 | 0.030 | 9.172 | 4.64E-20 | 6.78E-19 |
| PLEK | 1.520 | 0.404 | 0.044 | 9.170 | 4.72E-20 | 6.86E-19 |
| RPS27A | 12.478 | 0.311 | 0.034 | 9.167 | 4.85E-20 | 7.02E-19 |
| LGALS9 | 1.398 | 0.432 | 0.047 | 9.163 | 5.03E-20 | 7.24E-19 |
| NDUFA13 | 1.968 | 0.368 | 0.040 | 9.159 | 5.23E-20 | 7.50E-19 |
| FAU | 7.028 | 0.302 | 0.033 | 9.106 | 8.53E-20 | 1.22E-18 |
| SAMHD1 | 1.835 | 0.377 | 0.042 | 9.080 | 1.09E-19 | 1.55E-18 |
| RPL3 | 5.844 | 0.356 | 0.039 | 9.072 | 1.17E-19 | 1.65E-18 |
| VMP1 | 1.682 | 0.389 | 0.043 | 9.061 | 1.30E-19 | 1.83E-18 |
| HNRNPA2B1 | 2.382 | 0.334 | 0.037 | 9.036 | 1.63E-19 | 2.29E-18 |
| CARD16 | 1.934 | 0.379 | 0.042 | 9.024 | 1.82E-19 | 2.54E-18 |
| LRRFIP1 | 2.113 | 0.345 | 0.038 | 8.982 | 2.66E-19 | 3.70E-18 |
| ZFP36 | 2.394 | 0.356 | 0.040 | 8.960 | 3.24E-19 | 4.49E-18 |
| HBA1 | 1.960 | 0.448 | 0.050 | 8.949 | 3.60E-19 | 4.97E-18 |
| ANXA5 | 1.862 | 0.374 | 0.042 | 8.947 | 3.66E-19 | 5.03E-18 |
| TSPO | 3.161 | 0.304 | 0.034 | 8.922 | 4.57E-19 | 6.23E-18 |
| ATP6V0B | 1.867 | 0.362 | 0.041 | 8.922 | 4.57E-19 | 6.23E-18 |
| EEF2 | 2.285 | 0.343 | 0.039 | 8.888 | 6.25E-19 | 8.48E-18 |
| RNH1 | 1.440 | 0.413 | 0.047 | 8.881 | 6.62E-19 | 8.94E-18 |
| EDF1 | 2.026 | 0.348 | 0.039 | 8.872 | 7.16E-19 | 9.64E-18 |
| NDUFA3 | 1.769 | 0.371 | 0.042 | 8.860 | 8.00E-19 | 1.07E-17 |
| MYO1F | 1.616 | 0.398 | 0.045 | 8.858 | 8.11E-19 | 1.08E-17 |
| GNAI2 | 1.651 | 0.383 | 0.043 | 8.812 | 1.23E-18 | 1.63E-17 |
| TPM3 | 1.984 | 0.352 | 0.040 | 8.805 | 1.31E-18 | 1.73E-17 |
| MPEG1 | 1.767 | 0.372 | 0.042 | 8.795 | 1.44E-18 | 1.89E-17 |
| NFKBIA | 2.423 | 0.378 | 0.043 | 8.788 | 1.53E-18 | 2.01E-17 |
| RPL19 | 7.788 | 0.318 | 0.036 | 8.770 | 1.79E-18 | 2.34E-17 |
| TMEM59 | 1.652 | 0.378 | 0.043 | 8.764 | 1.88E-18 | 2.45E-17 |
| ARL6IP5 | 1.553 | 0.397 | 0.045 | 8.763 | 1.91E-18 | 2.48E-17 |
| EIF3G | 1.587 | 0.384 | 0.044 | 8.720 | 2.79E-18 | 3.60E-17 |
| FCGRT | 1.758 | 0.368 | 0.042 | 8.717 | 2.85E-18 | 3.67E-17 |
| GLTSCR2 | 1.818 | 0.368 | 0.042 | 8.691 | 3.59E-18 | 4.61E-17 |
| SH3BGRL | 1.808 | 0.370 | 0.043 | 8.684 | 3.81E-18 | 4.87E-17 |
| UCP2 | 1.547 | 0.387 | 0.045 | 8.608 | 7.44E-18 | 9.47E-17 |
| RPL39 | 19.531 | 0.265 | 0.031 | 8.587 | 8.96E-18 | 1.14E-16 |
| ATP6V0E1 | 2.272 | 0.317 | 0.037 | 8.565 | 1.08E-17 | 1.36E-16 |
| N4BP2L2 | 1.568 | 0.386 | 0.045 | 8.546 | 1.28E-17 | 1.61E-16 |
| RPL7 | 12.796 | 0.287 | 0.034 | 8.541 | 1.33E-17 | 1.66E-16 |
| CD48 | 1.877 | 0.356 | 0.042 | 8.529 | 1.47E-17 | 1.84E-16 |
| CCL4L2 | 1.161 | 0.426 | 0.050 | 8.523 | 1.55E-17 | 1.93E-16 |
| SNX3 | 1.877 | 0.345 | 0.041 | 8.494 | 1.99E-17 | 2.46E-16 |
| RPL6 | 4.756 | 0.316 | 0.037 | 8.460 | 2.67E-17 | 3.30E-16 |
| ATP5L | 3.274 | 0.284 | 0.034 | 8.457 | 2.73E-17 | 3.36E-16 |
| AC074117.10 | 1.347 | 0.410 | 0.049 | 8.413 | 3.99E-17 | 4.89E-16 |
| USMG5 | 2.191 | 0.321 | 0.038 | 8.393 | 4.73E-17 | 5.77E-16 |
| IRF1 | 1.361 | 0.403 | 0.048 | 8.366 | 5.96E-17 | 7.24E-16 |
| NDUFA1 | 1.728 | 0.353 | 0.042 | 8.353 | 6.63E-17 | 8.03E-16 |
| MOB1A | 1.553 | 0.372 | 0.045 | 8.341 | 7.39E-17 | 8.92E-16 |
| NACA | 3.943 | 0.329 | 0.040 | 8.330 | 8.05E-17 | 9.68E-16 |
| ACTR3 | 1.588 | 0.371 | 0.045 | 8.316 | 9.11E-17 | 1.09E-15 |
| IFI16 | 1.426 | 0.387 | 0.047 | 8.312 | 9.41E-17 | 1.12E-15 |
| NAP1L1 | 2.494 | 0.376 | 0.045 | 8.307 | 9.84E-17 | 1.17E-15 |
| CAPZB | 1.542 | 0.376 | 0.045 | 8.297 | 1.07E-16 | 1.26E-15 |
| EIF4A2 | 1.458 | 0.381 | 0.046 | 8.279 | 1.25E-16 | 1.47E-15 |
| PTGES3 | 1.549 | 0.377 | 0.046 | 8.272 | 1.31E-16 | 1.54E-15 |
| PRDX1 | 1.546 | 0.368 | 0.045 | 8.249 | 1.60E-16 | 1.88E-15 |
| MARCKS | 1.379 | 0.385 | 0.047 | 8.241 | 1.71E-16 | 2.00E-15 |
| NDUFS5 | 1.664 | 0.354 | 0.043 | 8.221 | 2.02E-16 | 2.35E-15 |
| LILRB2 | 1.444 | 0.381 | 0.046 | 8.202 | 2.37E-16 | 2.75E-15 |
| HIGD2A | 1.750 | 0.348 | 0.043 | 8.194 | 2.53E-16 | 2.92E-15 |
| PSMA4 | 1.687 | 0.350 | 0.043 | 8.193 | 2.55E-16 | 2.94E-15 |
| EEF1A1 | 18.024 | 0.312 | 0.038 | 8.191 | 2.58E-16 | 2.96E-15 |
| AP1S2 | 2.576 | 0.306 | 0.037 | 8.174 | 2.98E-16 | 3.40E-15 |
| DAZAP2 | 2.062 | 0.316 | 0.039 | 8.161 | 3.31E-16 | 3.77E-15 |
| FOLR3 | 1.202 | (0.389) | 0.048 | (8.157) | 3.42E-16 | 3.89E-15 |
| NDUFB1 | 2.375 | 0.300 | 0.037 | 8.156 | 3.47E-16 | 3.93E-15 |
| FOSB | 1.447 | (0.371) | 0.046 | (8.137) | 4.05E-16 | 4.57E-15 |
| CLEC7A | 2.008 | 0.318 | 0.039 | 8.100 | 5.52E-16 | 6.20E-15 |
| OST4 | 2.030 | 0.319 | 0.039 | 8.085 | 6.23E-16 | 6.97E-15 |
| NDUFB2 | 1.644 | 0.348 | 0.043 | 8.070 | 7.04E-16 | 7.85E-15 |
| LAMTOR4 | 2.374 | 0.292 | 0.036 | 8.053 | 8.07E-16 | 8.97E-15 |
| IFITM1 | 1.168 | 0.405 | 0.050 | 8.052 | 8.15E-16 | 9.03E-15 |
| PLAC8 | 1.766 | 0.348 | 0.043 | 8.050 | 8.27E-16 | 9.13E-15 |
| GIMAP4 | 1.364 | 0.381 | 0.047 | 8.014 | 1.11E-15 | 1.22E-14 |
| WSB1 | 1.459 | 0.367 | 0.046 | 8.007 | 1.17E-15 | 1.29E-14 |
| ATP5E | 6.399 | 0.241 | 0.030 | 7.994 | 1.31E-15 | 1.43E-14 |
| TNFSF10 | 1.351 | 0.383 | 0.048 | 7.990 | 1.35E-15 | 1.47E-14 |
| MAFB | 1.425 | 0.359 | 0.045 | 7.980 | 1.46E-15 | 1.59E-14 |
| AP2S1 | 1.980 | 0.314 | 0.039 | 7.979 | 1.47E-15 | 1.59E-14 |
| CAPZA2 | 1.508 | 0.364 | 0.046 | 7.972 | 1.56E-15 | 1.68E-14 |
| TNFRSF1B | 1.488 | 0.367 | 0.047 | 7.838 | 4.57E-15 | 4.91E-14 |
| C1orf162 | 2.217 | 0.299 | 0.038 | 7.836 | 4.66E-15 | 5.00E-14 |
| IGHG3 | 1.123 | 0.394 | 0.051 | 7.803 | 6.06E-15 | 6.47E-14 |
| MRC1 | 1.155 | 0.395 | 0.051 | 7.798 | 6.28E-15 | 6.68E-14 |
| UQCR10 | 1.690 | 0.333 | 0.043 | 7.794 | 6.48E-15 | 6.88E-14 |
| RPLP2 | 13.915 | 0.259 | 0.033 | 7.792 | 6.57E-15 | 6.95E-14 |
| PPP1CA | 1.585 | 0.346 | 0.044 | 7.776 | 7.48E-15 | 7.88E-14 |
| DOK2 | 1.337 | 0.375 | 0.048 | 7.767 | 8.04E-15 | 8.44E-14 |
| SUMO2 | 2.265 | 0.291 | 0.038 | 7.764 | 8.26E-15 | 8.65E-14 |
| COX4I1 | 3.400 | 0.258 | 0.033 | 7.750 | 9.21E-15 | 9.61E-14 |
| STAT1 | 1.273 | 0.373 | 0.049 | 7.688 | 1.50E-14 | 1.56E-13 |
| SARAF | 1.834 | 0.320 | 0.042 | 7.666 | 1.78E-14 | 1.84E-13 |
| BST2 | 1.468 | 0.352 | 0.046 | 7.644 | 2.10E-14 | 2.17E-13 |
| HCK | 1.455 | 0.358 | 0.047 | 7.626 | 2.42E-14 | 2.49E-13 |
| RPL13 | 15.408 | 0.251 | 0.033 | 7.608 | 2.78E-14 | 2.85E-13 |
| PRR13 | 1.879 | 0.312 | 0.041 | 7.603 | 2.90E-14 | 2.97E-13 |
| YWHAB | 1.975 | 0.303 | 0.040 | 7.594 | 3.09E-14 | 3.15E-13 |
| RNF213 | 1.366 | 0.362 | 0.048 | 7.594 | 3.10E-14 | 3.15E-13 |
| GSTK1 | 1.514 | 0.343 | 0.045 | 7.582 | 3.40E-14 | 3.45E-13 |
| HNRNPK | 1.908 | 0.307 | 0.041 | 7.573 | 3.64E-14 | 3.68E-13 |
| RPL35A | 7.135 | 0.260 | 0.034 | 7.571 | 3.72E-14 | 3.75E-13 |
| CIRBP | 1.755 | 0.323 | 0.043 | 7.559 | 4.07E-14 | 4.09E-13 |
| COX7A2 | 2.242 | 0.283 | 0.037 | 7.555 | 4.19E-14 | 4.20E-13 |
| POU2F2 | 1.405 | 0.358 | 0.048 | 7.531 | 5.02E-14 | 5.02E-13 |
| TMEM50A | 1.467 | 0.341 | 0.046 | 7.485 | 7.13E-14 | 7.11E-13 |
| NEDD8 | 1.722 | 0.314 | 0.042 | 7.475 | 7.73E-14 | 7.67E-13 |
| PSMB3 | 1.623 | 0.320 | 0.043 | 7.440 | 1.00E-13 | 9.94E-13 |
| TMBIM6 | 1.924 | 0.298 | 0.040 | 7.431 | 1.08E-13 | 1.07E-12 |
| TKT | 2.224 | 0.279 | 0.038 | 7.423 | 1.15E-13 | 1.13E-12 |
| EEF1D | 3.742 | 0.254 | 0.034 | 7.407 | 1.29E-13 | 1.27E-12 |
| H3F3A | 6.630 | 0.246 | 0.033 | 7.400 | 1.36E-13 | 1.33E-12 |
| RPL7A | 4.143 | 0.277 | 0.038 | 7.343 | 2.10E-13 | 2.04E-12 |
| TUBA1A | 1.605 | 0.325 | 0.044 | 7.342 | 2.10E-13 | 2.04E-12 |
| DUSP6 | 1.493 | 0.340 | 0.046 | 7.337 | 2.19E-13 | 2.12E-12 |
| ATP6V1F | 1.592 | 0.320 | 0.044 | 7.323 | 2.43E-13 | 2.35E-12 |
| JUN | 1.549 | 0.343 | 0.047 | 7.322 | 2.44E-13 | 2.36E-12 |
| CAP1 | 1.981 | 0.290 | 0.040 | 7.288 | 3.15E-13 | 3.02E-12 |
| RPL32 | 14.132 | 0.242 | 0.033 | 7.250 | 4.18E-13 | 4.00E-12 |
| RAB10 | 1.350 | 0.347 | 0.048 | 7.248 | 4.21E-13 | 4.03E-12 |
| COPE | 1.530 | 0.323 | 0.045 | 7.247 | 4.28E-13 | 4.06E-12 |
| CNBP | 1.641 | 0.322 | 0.044 | 7.246 | 4.28E-13 | 4.06E-12 |
| TALDO1 | 1.723 | 0.304 | 0.042 | 7.246 | 4.30E-13 | 4.07E-12 |
| MT-ND5 | 4.798 | 0.253 | 0.035 | 7.239 | 4.53E-13 | 4.27E-12 |
| SNRPD2 | 1.708 | 0.306 | 0.043 | 7.198 | 6.11E-13 | 5.75E-12 |
| RHOC | 1.371 | 0.354 | 0.050 | 7.139 | 9.38E-13 | 8.80E-12 |
| SDCBP | 1.835 | 0.291 | 0.041 | 7.137 | 9.52E-13 | 8.91E-12 |
| WARS | 1.350 | 0.342 | 0.048 | 7.135 | 9.71E-13 | 9.06E-12 |
| FAM133B | 1.393 | 0.333 | 0.047 | 7.114 | 1.12E-12 | 1.04E-11 |
| BLOC1S1 | 1.773 | 0.293 | 0.041 | 7.114 | 1.13E-12 | 1.04E-11 |
| MCL1 | 2.253 | (0.254) | 0.036 | (7.092) | 1.32E-12 | 1.22E-11 |
| 1-Mar | 1.405 | 0.333 | 0.047 | 7.088 | 1.36E-12 | 1.26E-11 |
| VAMP5 | 1.421 | 0.327 | 0.046 | 7.050 | 1.78E-12 | 1.64E-11 |
| RPLP0 | 3.398 | 0.269 | 0.038 | 7.029 | 2.08E-12 | 1.91E-11 |
| CTSZ | 1.501 | 0.315 | 0.045 | 7.027 | 2.11E-12 | 1.93E-11 |
| SKP1 | 1.748 | 0.296 | 0.042 | 7.023 | 2.17E-12 | 1.98E-11 |
| CYBB | 2.045 | 0.275 | 0.039 | 7.007 | 2.44E-12 | 2.22E-11 |
| TMEM123 | 1.400 | 0.325 | 0.046 | 7.000 | 2.56E-12 | 2.32E-11 |
| ENO1 | 1.939 | 0.279 | 0.040 | 6.983 | 2.89E-12 | 2.62E-11 |
| LYN | 1.548 | 0.310 | 0.045 | 6.946 | 3.77E-12 | 3.40E-11 |
| ARRB2 | 1.501 | 0.315 | 0.045 | 6.941 | 3.90E-12 | 3.51E-11 |
| PNRC1 | 1.588 | 0.303 | 0.044 | 6.936 | 4.05E-12 | 3.63E-11 |
| LAPTM4A | 1.523 | 0.312 | 0.045 | 6.919 | 4.54E-12 | 4.06E-11 |
| VASP | 1.502 | 0.318 | 0.046 | 6.912 | 4.79E-12 | 4.27E-11 |
| CTSB | 1.603 | 0.300 | 0.044 | 6.865 | 6.66E-12 | 5.92E-11 |
| COX8A | 2.019 | 0.270 | 0.039 | 6.864 | 6.71E-12 | 5.95E-11 |
| ACTR2 | 1.974 | 0.271 | 0.040 | 6.835 | 8.23E-12 | 7.28E-11 |
| TNFAIP2 | 1.337 | 0.327 | 0.048 | 6.832 | 8.38E-12 | 7.39E-11 |
| ADGRE5 | 1.356 | 0.326 | 0.048 | 6.814 | 9.52E-12 | 8.38E-11 |
| SSR4 | 1.845 | 0.275 | 0.040 | 6.809 | 9.81E-12 | 8.61E-11 |
| FGR | 1.672 | 0.293 | 0.043 | 6.771 | 1.28E-11 | 1.12E-10 |
| ATP6V1G1 | 1.881 | 0.274 | 0.040 | 6.761 | 1.37E-11 | 1.19E-10 |
| CSF3R | 1.590 | 0.298 | 0.044 | 6.714 | 1.89E-11 | 1.65E-10 |
| CAPZA1 | 1.548 | 0.300 | 0.045 | 6.703 | 2.04E-11 | 1.77E-10 |
| GUK1 | 1.551 | 0.295 | 0.044 | 6.696 | 2.14E-11 | 1.86E-10 |
| PILRA | 1.394 | 0.317 | 0.047 | 6.680 | 2.39E-11 | 2.07E-10 |
| CASP1 | 1.609 | 0.292 | 0.044 | 6.646 | 3.01E-11 | 2.59E-10 |
| HMGB1 | 2.277 | 0.246 | 0.037 | 6.639 | 3.15E-11 | 2.71E-10 |
| TUBA1B | 1.648 | 0.292 | 0.044 | 6.639 | 3.16E-11 | 2.71E-10 |
| ZFAS1 | 2.066 | 0.259 | 0.039 | 6.631 | 3.33E-11 | 2.84E-10 |
| HSP90AA1 | 2.109 | 0.262 | 0.040 | 6.626 | 3.45E-11 | 2.94E-10 |
| ASAH1 | 1.948 | 0.268 | 0.040 | 6.606 | 3.96E-11 | 3.37E-10 |
| EVI2A | 1.490 | 0.296 | 0.045 | 6.602 | 4.06E-11 | 3.45E-10 |
| LRRC25 | 1.348 | 0.324 | 0.049 | 6.598 | 4.16E-11 | 3.52E-10 |
| SERP1 | 2.147 | 0.255 | 0.039 | 6.598 | 4.18E-11 | 3.52E-10 |
| LINC01272 | 1.664 | 0.299 | 0.045 | 6.585 | 4.55E-11 | 3.83E-10 |
| SRP14 | 2.249 | 0.247 | 0.037 | 6.584 | 4.57E-11 | 3.84E-10 |
| PSMA7 | 1.938 | 0.261 | 0.040 | 6.553 | 5.64E-11 | 4.72E-10 |
| MSN | 1.727 | 0.278 | 0.042 | 6.544 | 6.00E-11 | 5.01E-10 |
| RAC2 | 1.477 | 0.301 | 0.046 | 6.538 | 6.23E-11 | 5.19E-10 |
| JAML | 1.556 | 0.294 | 0.045 | 6.522 | 6.92E-11 | 5.75E-10 |
| BAX | 1.372 | 0.306 | 0.047 | 6.512 | 7.43E-11 | 6.15E-10 |
| RPSA | 3.119 | 0.259 | 0.040 | 6.506 | 7.70E-11 | 6.37E-10 |
| BTF3 | 3.501 | 0.233 | 0.036 | 6.464 | 1.02E-10 | 8.41E-10 |
| LTB | 1.282 | 0.316 | 0.049 | 6.454 | 1.09E-10 | 8.95E-10 |
| CD63 | 1.723 | 0.265 | 0.041 | 6.451 | 1.11E-10 | 9.11E-10 |
| PPT1 | 1.490 | 0.289 | 0.045 | 6.449 | 1.12E-10 | 9.19E-10 |
| MBNL1 | 1.599 | 0.283 | 0.044 | 6.449 | 1.13E-10 | 9.20E-10 |
| UBA52 | 7.355 | 0.206 | 0.032 | 6.438 | 1.21E-10 | 9.86E-10 |
| STK4 | 1.389 | 0.300 | 0.047 | 6.437 | 1.22E-10 | 9.92E-10 |
| BID | 1.343 | 0.310 | 0.048 | 6.433 | 1.25E-10 | 1.01E-09 |
| IRS2 | 1.331 | (0.297) | 0.046 | (6.400) | 1.55E-10 | 1.25E-09 |
| ATP5D | 1.646 | 0.269 | 0.042 | 6.398 | 1.57E-10 | 1.27E-09 |
| ARL6IP4 | 1.753 | 0.268 | 0.042 | 6.394 | 1.62E-10 | 1.30E-09 |
| PKM | 1.778 | 0.262 | 0.041 | 6.383 | 1.73E-10 | 1.39E-09 |
| MORF4L1 | 1.595 | 0.281 | 0.044 | 6.383 | 1.73E-10 | 1.39E-09 |
| IGSF6 | 1.408 | 0.297 | 0.046 | 6.382 | 1.75E-10 | 1.39E-09 |
| CSF1R | 1.265 | 0.316 | 0.050 | 6.375 | 1.83E-10 | 1.46E-09 |
| BSG | 1.354 | 0.301 | 0.047 | 6.365 | 1.96E-10 | 1.55E-09 |
| PTPRE | 1.593 | 0.275 | 0.043 | 6.345 | 2.22E-10 | 1.76E-09 |
| PNISR | 1.424 | 0.297 | 0.047 | 6.342 | 2.27E-10 | 1.79E-09 |
| KLF2 | 1.425 | 0.296 | 0.047 | 6.341 | 2.28E-10 | 1.80E-09 |
| DYNLL1 | 1.775 | 0.268 | 0.042 | 6.330 | 2.44E-10 | 1.92E-09 |
| HNRNPDL | 1.727 | 0.266 | 0.042 | 6.328 | 2.48E-10 | 1.95E-09 |
| HMOX1 | 1.302 | 0.307 | 0.049 | 6.326 | 2.51E-10 | 1.97E-09 |
| IFI44 | 1.163 | 0.317 | 0.050 | 6.314 | 2.71E-10 | 2.12E-09 |
| CD99 | 1.435 | 0.288 | 0.046 | 6.307 | 2.84E-10 | 2.21E-09 |
| PDIA3 | 1.419 | 0.291 | 0.046 | 6.305 | 2.89E-10 | 2.24E-09 |
| CCL3L3 | 1.204 | 0.305 | 0.049 | 6.287 | 3.24E-10 | 2.51E-09 |
| SYNGR2 | 1.287 | 0.306 | 0.049 | 6.286 | 3.25E-10 | 2.52E-09 |
| IGHG4 | 1.105 | 0.319 | 0.051 | 6.271 | 3.59E-10 | 2.77E-09 |
| UBE2D3 | 1.824 | 0.256 | 0.041 | 6.259 | 3.88E-10 | 2.99E-09 |
| PPIB | 1.496 | 0.281 | 0.045 | 6.230 | 4.66E-10 | 3.58E-09 |
| ERP29 | 1.566 | 0.274 | 0.044 | 6.217 | 5.08E-10 | 3.89E-09 |
| SRSF5 | 1.891 | 0.258 | 0.042 | 6.214 | 5.17E-10 | 3.95E-09 |
| KLF4 | 1.549 | (0.269) | 0.043 | (6.212) | 5.23E-10 | 3.99E-09 |
| SNX2 | 1.308 | 0.299 | 0.048 | 6.195 | 5.84E-10 | 4.44E-09 |
| PPP1R15A | 1.353 | 0.292 | 0.047 | 6.185 | 6.19E-10 | 4.70E-09 |
| NAGK | 1.314 | 0.300 | 0.049 | 6.182 | 6.34E-10 | 4.81E-09 |
| PSMA2 | 1.536 | 0.274 | 0.044 | 6.178 | 6.51E-10 | 4.92E-09 |
| JCHAIN | 1.104 | 0.315 | 0.051 | 6.175 | 6.64E-10 | 5.00E-09 |
| CPPED1 | 1.356 | 0.296 | 0.048 | 6.162 | 7.20E-10 | 5.41E-09 |
| NOP10 | 1.729 | 0.259 | 0.042 | 6.157 | 7.40E-10 | 5.55E-09 |
| WDR83OS | 1.508 | 0.279 | 0.045 | 6.151 | 7.72E-10 | 5.78E-09 |
| TRAPPC1 | 1.549 | 0.272 | 0.044 | 6.147 | 7.89E-10 | 5.90E-09 |
| CSTA | 3.141 | (0.221) | 0.036 | (6.128) | 8.87E-10 | 6.61E-09 |
| RPS7 | 4.794 | 0.229 | 0.037 | 6.124 | 9.15E-10 | 6.80E-09 |
| CEBPB | 1.723 | 0.259 | 0.042 | 6.119 | 9.39E-10 | 6.97E-09 |
| SNRPG | 1.547 | 0.273 | 0.045 | 6.106 | 1.02E-09 | 7.55E-09 |
| RAP1B | 1.419 | 0.288 | 0.047 | 6.105 | 1.03E-09 | 7.61E-09 |
| RP11-347P5.1 | 1.462 | 0.292 | 0.048 | 6.054 | 1.41E-09 | 1.04E-08 |
| PCBP2 | 1.819 | 0.255 | 0.042 | 6.049 | 1.46E-09 | 1.07E-08 |
| HLA-DMB | 1.396 | 0.286 | 0.047 | 6.048 | 1.47E-09 | 1.08E-08 |
| IGLL5 | 1.085 | 0.313 | 0.052 | 6.038 | 1.56E-09 | 1.14E-08 |
| ARPC4 | 1.570 | 0.273 | 0.045 | 6.032 | 1.62E-09 | 1.18E-08 |
| UBE2D1 | 1.344 | 0.282 | 0.047 | 5.995 | 2.03E-09 | 1.48E-08 |
| ADAR | 1.295 | 0.290 | 0.048 | 5.994 | 2.04E-09 | 1.49E-08 |
| C9orf16 | 1.459 | 0.272 | 0.045 | 5.981 | 2.22E-09 | 1.61E-08 |
| RNF181 | 1.376 | 0.279 | 0.047 | 5.964 | 2.46E-09 | 1.78E-08 |
| GNAQ | 1.398 | 0.274 | 0.046 | 5.947 | 2.74E-09 | 1.98E-08 |
| APRT | 1.664 | 0.254 | 0.043 | 5.940 | 2.85E-09 | 2.05E-08 |
| SAP18 | 1.495 | 0.269 | 0.045 | 5.938 | 2.89E-09 | 2.08E-08 |
| KRTCAP2 | 1.314 | 0.286 | 0.048 | 5.930 | 3.03E-09 | 2.17E-08 |
| ATP5B | 1.480 | 0.271 | 0.046 | 5.920 | 3.22E-09 | 2.31E-08 |
| GNG5 | 1.758 | 0.249 | 0.042 | 5.914 | 3.34E-09 | 2.38E-08 |
| C11orf31 | 1.524 | 0.266 | 0.045 | 5.903 | 3.57E-09 | 2.55E-08 |
| YWHAZ | 1.836 | 0.241 | 0.041 | 5.900 | 3.63E-09 | 2.58E-08 |
| LYPD2 | 1.298 | 0.333 | 0.057 | 5.893 | 3.79E-09 | 2.69E-08 |
| PSMB1 | 1.464 | 0.269 | 0.046 | 5.888 | 3.91E-09 | 2.77E-08 |
| STXBP2 | 2.298 | 0.240 | 0.041 | 5.868 | 4.40E-09 | 3.11E-08 |
| BRI3 | 1.293 | 0.280 | 0.048 | 5.861 | 4.61E-09 | 3.25E-08 |
| IGHG1 | 1.091 | 0.300 | 0.051 | 5.857 | 4.72E-09 | 3.32E-08 |
| SSR2 | 1.477 | 0.268 | 0.046 | 5.854 | 4.79E-09 | 3.36E-08 |
| NINJ1 | 1.308 | 0.279 | 0.048 | 5.841 | 5.17E-09 | 3.62E-08 |
| RBPJ | 1.337 | 0.276 | 0.047 | 5.825 | 5.70E-09 | 3.98E-08 |
| APLP2 | 2.011 | 0.226 | 0.039 | 5.819 | 5.91E-09 | 4.12E-08 |
| ICAM3 | 1.439 | 0.268 | 0.046 | 5.818 | 5.94E-09 | 4.14E-08 |
| PCBP1 | 1.966 | 0.227 | 0.039 | 5.816 | 6.04E-09 | 4.19E-08 |
| HLA-F | 1.248 | 0.287 | 0.049 | 5.809 | 6.30E-09 | 4.37E-08 |
| NDUFA4 | 1.987 | 0.228 | 0.039 | 5.802 | 6.57E-09 | 4.54E-08 |
| IFNGR1 | 1.364 | 0.272 | 0.047 | 5.775 | 7.71E-09 | 5.32E-08 |
| CSK | 1.298 | 0.279 | 0.049 | 5.747 | 9.10E-09 | 6.26E-08 |
| CPVL | 1.634 | 0.260 | 0.045 | 5.746 | 9.12E-09 | 6.26E-08 |
| RAB7A | 1.405 | 0.267 | 0.047 | 5.731 | 9.98E-09 | 6.84E-08 |
| CLEC12A | 1.590 | 0.254 | 0.044 | 5.731 | 9.99E-09 | 6.84E-08 |
| XIST | 1.318 | (0.282) | 0.049 | (5.720) | 1.07E-08 | 7.29E-08 |
| FAM26F | 1.484 | 0.270 | 0.047 | 5.719 | 1.07E-08 | 7.29E-08 |
| SPCS2 | 1.330 | 0.273 | 0.048 | 5.704 | 1.17E-08 | 7.94E-08 |
| FAM49B | 1.575 | 0.251 | 0.044 | 5.697 | 1.22E-08 | 8.28E-08 |
| SCO2 | 1.301 | 0.272 | 0.048 | 5.695 | 1.23E-08 | 8.34E-08 |
| PARP14 | 1.228 | 0.282 | 0.050 | 5.694 | 1.24E-08 | 8.39E-08 |
| EIF4G2 | 1.578 | 0.251 | 0.044 | 5.692 | 1.26E-08 | 8.48E-08 |
| CALR | 1.334 | 0.271 | 0.048 | 5.689 | 1.28E-08 | 8.59E-08 |
| CD36 | 1.774 | 0.233 | 0.041 | 5.674 | 1.39E-08 | 9.36E-08 |
| SON | 1.510 | 0.256 | 0.045 | 5.663 | 1.49E-08 | 9.95E-08 |
| MGAT1 | 1.273 | 0.276 | 0.049 | 5.654 | 1.57E-08 | 1.05E-07 |
| EPSTI1 | 1.152 | 0.284 | 0.050 | 5.643 | 1.67E-08 | 1.11E-07 |
| OAS3 | 1.125 | 0.287 | 0.051 | 5.631 | 1.79E-08 | 1.19E-07 |
| UTRN | 1.272 | 0.277 | 0.049 | 5.617 | 1.94E-08 | 1.29E-07 |
| RPL24 | 4.132 | 0.197 | 0.035 | 5.613 | 1.99E-08 | 1.32E-07 |
| SUB1 | 2.307 | 0.202 | 0.036 | 5.600 | 2.15E-08 | 1.42E-07 |
| CAPNS1 | 1.470 | 0.254 | 0.045 | 5.598 | 2.17E-08 | 1.43E-07 |
| VPS29 | 1.489 | 0.252 | 0.045 | 5.597 | 2.18E-08 | 1.44E-07 |
| HSBP1 | 1.575 | 0.249 | 0.045 | 5.593 | 2.23E-08 | 1.47E-07 |
| CCNL1 | 1.734 | 0.234 | 0.042 | 5.591 | 2.26E-08 | 1.48E-07 |
| CBX3 | 1.448 | 0.257 | 0.046 | 5.591 | 2.26E-08 | 1.48E-07 |
| FAM65B | 1.463 | 0.259 | 0.046 | 5.586 | 2.32E-08 | 1.52E-07 |
| GSTO1 | 1.534 | 0.247 | 0.044 | 5.580 | 2.41E-08 | 1.57E-07 |
| GDI2 | 1.574 | 0.245 | 0.044 | 5.526 | 3.28E-08 | 2.14E-07 |
| FBXL5 | 1.394 | 0.256 | 0.046 | 5.515 | 3.49E-08 | 2.27E-07 |
| PECAM1 | 1.447 | 0.257 | 0.047 | 5.513 | 3.52E-08 | 2.28E-07 |
| RABGAP1L | 1.233 | 0.274 | 0.050 | 5.497 | 3.87E-08 | 2.51E-07 |
| PSMB8 | 1.377 | 0.259 | 0.047 | 5.493 | 3.96E-08 | 2.56E-07 |
| 7-Sep | 1.430 | 0.254 | 0.046 | 5.486 | 4.12E-08 | 2.65E-07 |
| POMP | 1.923 | 0.216 | 0.039 | 5.480 | 4.25E-08 | 2.74E-07 |
| CMTM6 | 1.597 | 0.237 | 0.043 | 5.469 | 4.52E-08 | 2.90E-07 |
| ABI3 | 1.223 | 0.275 | 0.050 | 5.458 | 4.82E-08 | 3.09E-07 |
| RPS3 | 6.355 | 0.204 | 0.037 | 5.454 | 4.94E-08 | 3.16E-07 |
| RNF13 | 1.266 | 0.265 | 0.049 | 5.442 | 5.26E-08 | 3.36E-07 |
| SEC61G | 1.895 | 0.215 | 0.040 | 5.441 | 5.31E-08 | 3.38E-07 |
| RAP1A | 1.465 | 0.250 | 0.046 | 5.440 | 5.32E-08 | 3.38E-07 |
| ATP6V0D1 | 1.439 | 0.248 | 0.046 | 5.435 | 5.47E-08 | 3.47E-07 |
| ZYX | 1.401 | 0.251 | 0.046 | 5.419 | 6.01E-08 | 3.81E-07 |
| DYNLT1 | 1.383 | 0.253 | 0.047 | 5.415 | 6.14E-08 | 3.88E-07 |
| UBXN1 | 1.458 | 0.248 | 0.046 | 5.403 | 6.56E-08 | 4.14E-07 |
| TPPP3 | 1.171 | 0.275 | 0.051 | 5.401 | 6.62E-08 | 4.17E-07 |
| RPL5 | 3.656 | 0.211 | 0.039 | 5.396 | 6.80E-08 | 4.28E-07 |
| SCAF11 | 1.384 | 0.254 | 0.047 | 5.390 | 7.03E-08 | 4.41E-07 |
| OAS1 | 1.186 | 0.273 | 0.051 | 5.389 | 7.09E-08 | 4.44E-07 |
| C19orf43 | 1.683 | 0.233 | 0.043 | 5.387 | 7.15E-08 | 4.47E-07 |
| CECR1 | 1.466 | 0.244 | 0.045 | 5.384 | 7.27E-08 | 4.54E-07 |
| SNHG25 | 1.496 | 0.246 | 0.046 | 5.377 | 7.56E-08 | 4.71E-07 |
| RTN4 | 1.666 | 0.233 | 0.043 | 5.376 | 7.61E-08 | 4.73E-07 |
| C1QA | 1.142 | 0.275 | 0.051 | 5.366 | 8.03E-08 | 4.98E-07 |
| PSMB10 | 1.316 | 0.260 | 0.048 | 5.364 | 8.12E-08 | 5.03E-07 |
| DUSP1 | 2.527 | 0.217 | 0.041 | 5.363 | 8.16E-08 | 5.05E-07 |
| CCNI | 2.042 | 0.212 | 0.040 | 5.353 | 8.67E-08 | 5.35E-07 |
| TMEM219 | 1.362 | 0.250 | 0.047 | 5.351 | 8.73E-08 | 5.38E-07 |
| NDUFA2 | 1.489 | 0.240 | 0.045 | 5.348 | 8.91E-08 | 5.48E-07 |
| LY96 | 1.471 | 0.241 | 0.045 | 5.332 | 9.72E-08 | 5.96E-07 |
| ATG3 | 1.446 | 0.248 | 0.047 | 5.326 | 1.00E-07 | 6.14E-07 |
| CNPY3 | 1.640 | 0.231 | 0.043 | 5.323 | 1.02E-07 | 6.22E-07 |
| HBEGF | 1.148 | (0.264) | 0.050 | (5.316) | 1.06E-07 | 6.48E-07 |
| SYF2 | 1.452 | 0.244 | 0.046 | 5.304 | 1.13E-07 | 6.88E-07 |
| ATP5H | 1.403 | 0.247 | 0.047 | 5.303 | 1.14E-07 | 6.92E-07 |
| C4orf48 | 1.657 | 0.225 | 0.043 | 5.293 | 1.20E-07 | 7.28E-07 |
| TAPBP | 1.348 | 0.249 | 0.047 | 5.283 | 1.27E-07 | 7.70E-07 |
| CIB1 | 1.345 | 0.251 | 0.048 | 5.271 | 1.36E-07 | 8.19E-07 |
| LAMTOR2 | 1.435 | 0.240 | 0.046 | 5.260 | 1.44E-07 | 8.67E-07 |
| NPM1 | 1.924 | 0.212 | 0.040 | 5.257 | 1.46E-07 | 8.81E-07 |
| C19orf53 | 1.544 | 0.232 | 0.044 | 5.253 | 1.49E-07 | 8.98E-07 |
| NDUFB8 | 1.397 | 0.243 | 0.046 | 5.251 | 1.51E-07 | 9.07E-07 |
| NCOA4 | 1.347 | 0.248 | 0.047 | 5.244 | 1.57E-07 | 9.43E-07 |
| SUMO1 | 1.405 | 0.242 | 0.046 | 5.231 | 1.69E-07 | 1.01E-06 |
| ANAPC11 | 1.364 | 0.244 | 0.047 | 5.224 | 1.75E-07 | 1.05E-06 |
| RPL30 | 6.105 | 0.197 | 0.038 | 5.221 | 1.78E-07 | 1.06E-06 |
| TGFB1 | 1.344 | 0.247 | 0.047 | 5.215 | 1.84E-07 | 1.09E-06 |
| ARF5 | 1.279 | 0.255 | 0.049 | 5.202 | 1.98E-07 | 1.17E-06 |
| IQGAP1 | 1.776 | 0.213 | 0.041 | 5.196 | 2.03E-07 | 1.20E-06 |
| FKBP8 | 1.354 | 0.246 | 0.047 | 5.193 | 2.07E-07 | 1.22E-06 |
| IL10RA | 1.274 | 0.255 | 0.049 | 5.187 | 2.14E-07 | 1.26E-06 |
| ARL4A | 1.224 | (0.249) | 0.048 | (5.183) | 2.18E-07 | 1.29E-06 |
| TMBIM4 | 1.569 | 0.229 | 0.044 | 5.176 | 2.26E-07 | 1.33E-06 |
| C14orf2 | 3.686 | 0.163 | 0.032 | 5.165 | 2.41E-07 | 1.41E-06 |
| IFNGR2 | 1.319 | 0.243 | 0.047 | 5.163 | 2.43E-07 | 1.42E-06 |
| WAS | 1.329 | 0.248 | 0.048 | 5.153 | 2.57E-07 | 1.50E-06 |
| TUBB | 1.274 | 0.250 | 0.049 | 5.145 | 2.67E-07 | 1.56E-06 |
| SUPT4H1 | 1.380 | 0.242 | 0.047 | 5.145 | 2.68E-07 | 1.56E-06 |
| SLC25A3 | 1.942 | 0.205 | 0.040 | 5.144 | 2.69E-07 | 1.56E-06 |
| 15-Sep | 1.388 | 0.239 | 0.046 | 5.140 | 2.74E-07 | 1.59E-06 |
| TRMT112 | 1.344 | 0.242 | 0.047 | 5.139 | 2.77E-07 | 1.60E-06 |
| CD300E | 1.317 | 0.249 | 0.048 | 5.137 | 2.80E-07 | 1.62E-06 |
| PABPC1 | 4.207 | 0.187 | 0.037 | 5.125 | 2.97E-07 | 1.72E-06 |
| TPT1 | 12.306 | (0.171) | 0.033 | (5.107) | 3.27E-07 | 1.89E-06 |
| CHURC1 | 1.335 | 0.244 | 0.048 | 5.100 | 3.40E-07 | 1.95E-06 |
| ARHGAP30 | 1.292 | 0.248 | 0.049 | 5.100 | 3.40E-07 | 1.95E-06 |
| HNRNPC | 1.764 | 0.212 | 0.042 | 5.094 | 3.51E-07 | 2.01E-06 |
| IRF7 | 1.182 | 0.256 | 0.050 | 5.089 | 3.60E-07 | 2.06E-06 |
| GNS | 1.274 | 0.245 | 0.048 | 5.088 | 3.62E-07 | 2.07E-06 |
| MT2A | 2.427 | 0.251 | 0.049 | 5.086 | 3.65E-07 | 2.08E-06 |
| ATP5C1 | 1.533 | 0.226 | 0.045 | 5.086 | 3.66E-07 | 2.08E-06 |
| EIF3E | 2.053 | 0.198 | 0.039 | 5.082 | 3.74E-07 | 2.12E-06 |
| RP11-386I14.4 | 1.686 | 0.243 | 0.048 | 5.081 | 3.75E-07 | 2.13E-06 |
| RP5-1171I10.5 | 1.269 | 0.252 | 0.050 | 5.072 | 3.94E-07 | 2.23E-06 |
| NKG7 | 1.232 | 0.249 | 0.049 | 5.064 | 4.10E-07 | 2.32E-06 |
| CLEC2B | 1.315 | 0.243 | 0.048 | 5.061 | 4.18E-07 | 2.36E-06 |
| SLIRP | 1.386 | 0.235 | 0.047 | 5.043 | 4.57E-07 | 2.58E-06 |
| GRB2 | 1.372 | 0.240 | 0.048 | 5.041 | 4.64E-07 | 2.61E-06 |
| CELF1 | 1.294 | 0.242 | 0.048 | 5.037 | 4.73E-07 | 2.66E-06 |
| CH17-373J23.1 | 1.890 | 0.210 | 0.042 | 5.032 | 4.86E-07 | 2.72E-06 |
| CD164 | 1.372 | 0.235 | 0.047 | 5.023 | 5.09E-07 | 2.85E-06 |
| UQCRQ | 1.813 | 0.204 | 0.041 | 5.013 | 5.35E-07 | 2.99E-06 |
| GNB2 | 1.268 | 0.241 | 0.048 | 4.991 | 6.01E-07 | 3.35E-06 |
| CD86 | 1.305 | 0.241 | 0.048 | 4.986 | 6.15E-07 | 3.43E-06 |
| CCDC12 | 1.215 | 0.249 | 0.050 | 4.971 | 6.66E-07 | 3.70E-06 |
| HSP90B1 | 1.590 | 0.216 | 0.043 | 4.970 | 6.70E-07 | 3.72E-06 |
| RP11-1143G9.4 | 5.633 | 0.243 | 0.049 | 4.969 | 6.73E-07 | 3.73E-06 |
| VIM | 5.845 | 0.188 | 0.038 | 4.962 | 6.96E-07 | 3.85E-06 |
| MX1 | 1.134 | 0.252 | 0.051 | 4.959 | 7.10E-07 | 3.92E-06 |
| ANKRD44 | 1.256 | 0.243 | 0.049 | 4.948 | 7.49E-07 | 4.13E-06 |
| CFLAR | 1.326 | 0.234 | 0.047 | 4.939 | 7.85E-07 | 4.32E-06 |
| LTA4H | 1.746 | 0.210 | 0.043 | 4.927 | 8.36E-07 | 4.59E-06 |
| RPL27 | 5.018 | 0.175 | 0.035 | 4.927 | 8.37E-07 | 4.59E-06 |
| TOMM7 | 2.833 | 0.172 | 0.035 | 4.914 | 8.92E-07 | 4.88E-06 |
| PRDX5 | 1.546 | 0.218 | 0.044 | 4.912 | 9.01E-07 | 4.93E-06 |
| LGALS3 | 1.510 | 0.224 | 0.046 | 4.902 | 9.49E-07 | 5.18E-06 |
| EVL | 1.201 | 0.248 | 0.051 | 4.894 | 9.86E-07 | 5.37E-06 |
| ATP2B1 | 1.523 | 0.212 | 0.043 | 4.891 | 1.00E-06 | 5.45E-06 |
| ERH | 1.503 | 0.219 | 0.045 | 4.891 | 1.00E-06 | 5.46E-06 |
| MRPS21 | 1.308 | 0.233 | 0.048 | 4.883 | 1.04E-06 | 5.66E-06 |
| SLC7A7 | 1.484 | 0.224 | 0.046 | 4.880 | 1.06E-06 | 5.75E-06 |
| USP15 | 1.337 | 0.233 | 0.048 | 4.872 | 1.10E-06 | 5.96E-06 |
| FMNL1 | 1.356 | 0.230 | 0.047 | 4.867 | 1.13E-06 | 6.10E-06 |
| HSP90AB1 | 1.520 | 0.218 | 0.045 | 4.846 | 1.26E-06 | 6.80E-06 |
| TGFBI | 1.408 | 0.227 | 0.047 | 4.841 | 1.29E-06 | 6.93E-06 |
| MYO1G | 1.331 | 0.231 | 0.048 | 4.825 | 1.40E-06 | 7.52E-06 |
| HMGN2 | 2.174 | 0.186 | 0.039 | 4.823 | 1.42E-06 | 7.58E-06 |
| FUS | 1.410 | 0.224 | 0.047 | 4.821 | 1.43E-06 | 7.64E-06 |
| HSD17B11 | 1.482 | 0.218 | 0.045 | 4.817 | 1.46E-06 | 7.80E-06 |
| RPL22 | 4.666 | 0.170 | 0.035 | 4.806 | 1.54E-06 | 8.19E-06 |
| OSTF1 | 1.382 | 0.225 | 0.047 | 4.792 | 1.65E-06 | 8.78E-06 |
| NCF2 | 1.506 | 0.217 | 0.045 | 4.781 | 1.74E-06 | 9.27E-06 |
| NAMPT | 2.083 | (0.188) | 0.039 | (4.772) | 1.82E-06 | 9.66E-06 |
| BLVRA | 1.254 | 0.234 | 0.049 | 4.763 | 1.91E-06 | 1.01E-05 |
| BCAP31 | 1.273 | 0.231 | 0.049 | 4.754 | 1.99E-06 | 1.05E-05 |
| XAF1 | 1.131 | 0.242 | 0.051 | 4.751 | 2.02E-06 | 1.07E-05 |
| NDUFA6 | 1.267 | 0.231 | 0.049 | 4.750 | 2.03E-06 | 1.07E-05 |
| DECR1 | 1.278 | 0.229 | 0.048 | 4.728 | 2.27E-06 | 1.19E-05 |
| TRIM22 | 1.203 | 0.233 | 0.049 | 4.726 | 2.29E-06 | 1.20E-05 |
| PPP4C | 1.318 | 0.227 | 0.048 | 4.713 | 2.44E-06 | 1.28E-05 |
| SQSTM1 | 1.224 | 0.233 | 0.049 | 4.711 | 2.46E-06 | 1.29E-05 |
| UBE2L3 | 1.313 | 0.224 | 0.048 | 4.688 | 2.76E-06 | 1.44E-05 |
| IFIT3 | 1.102 | 0.241 | 0.052 | 4.677 | 2.91E-06 | 1.52E-05 |
| CHCHD10 | 1.170 | 0.234 | 0.050 | 4.675 | 2.94E-06 | 1.53E-05 |
| GABARAP | 1.659 | 0.207 | 0.044 | 4.674 | 2.95E-06 | 1.54E-05 |
| C11orf58 | 1.396 | 0.220 | 0.047 | 4.668 | 3.05E-06 | 1.58E-05 |
| CAPG | 1.547 | 0.201 | 0.043 | 4.659 | 3.17E-06 | 1.65E-05 |
| SRRM2 | 1.301 | 0.224 | 0.048 | 4.659 | 3.18E-06 | 1.65E-05 |
| DDX17 | 1.476 | 0.213 | 0.046 | 4.648 | 3.35E-06 | 1.73E-05 |
| GLIPR2 | 1.428 | 0.213 | 0.046 | 4.635 | 3.58E-06 | 1.85E-05 |
| GNLY | 1.156 | 0.237 | 0.051 | 4.626 | 3.72E-06 | 1.92E-05 |
| PLP2 | 1.440 | 0.210 | 0.046 | 4.622 | 3.80E-06 | 1.96E-05 |
| HSPA8 | 1.404 | 0.219 | 0.048 | 4.613 | 3.97E-06 | 2.04E-05 |
| BRK1 | 1.688 | 0.197 | 0.043 | 4.609 | 4.04E-06 | 2.07E-05 |
| EFHD2 | 1.455 | 0.209 | 0.045 | 4.606 | 4.10E-06 | 2.10E-05 |
| CDC37 | 1.221 | 0.228 | 0.050 | 4.599 | 4.24E-06 | 2.17E-05 |
| CX3CR1 | 1.197 | 0.234 | 0.051 | 4.597 | 4.29E-06 | 2.19E-05 |
| SELPLG | 1.292 | 0.222 | 0.048 | 4.596 | 4.30E-06 | 2.19E-05 |
| SPN | 1.330 | 0.223 | 0.049 | 4.594 | 4.34E-06 | 2.21E-05 |
| UQCRFS1 | 1.434 | 0.210 | 0.046 | 4.590 | 4.43E-06 | 2.25E-05 |
| WASF2 | 1.325 | 0.221 | 0.048 | 4.582 | 4.61E-06 | 2.34E-05 |
| PAIP2 | 1.404 | 0.215 | 0.047 | 4.579 | 4.67E-06 | 2.36E-05 |
| ZNF207 | 1.338 | 0.219 | 0.048 | 4.579 | 4.67E-06 | 2.36E-05 |
| PLEKHO1 | 1.211 | 0.228 | 0.050 | 4.577 | 4.72E-06 | 2.38E-05 |
| CD4 | 1.320 | 0.221 | 0.048 | 4.574 | 4.78E-06 | 2.41E-05 |
| HCLS1 | 1.485 | 0.208 | 0.046 | 4.566 | 4.96E-06 | 2.50E-05 |
| EIF3K | 2.029 | 0.176 | 0.039 | 4.563 | 5.03E-06 | 2.53E-05 |
| RAB11A | 1.260 | 0.222 | 0.049 | 4.559 | 5.14E-06 | 2.58E-05 |
| C19orf70 | 1.328 | 0.216 | 0.048 | 4.548 | 5.42E-06 | 2.72E-05 |
| SELT | 1.348 | 0.215 | 0.047 | 4.542 | 5.58E-06 | 2.79E-05 |
| GIMAP7 | 1.224 | 0.230 | 0.051 | 4.535 | 5.76E-06 | 2.88E-05 |
| NKTR | 1.269 | 0.222 | 0.049 | 4.529 | 5.93E-06 | 2.96E-05 |
| MEF2C | 1.559 | 0.204 | 0.045 | 4.523 | 6.10E-06 | 3.04E-05 |
| REEP5 | 1.364 | 0.213 | 0.047 | 4.521 | 6.16E-06 | 3.06E-05 |
| MIF | 1.424 | 0.208 | 0.046 | 4.516 | 6.30E-06 | 3.13E-05 |
| LAP3 | 1.235 | 0.221 | 0.049 | 4.510 | 6.50E-06 | 3.22E-05 |
| CDC42EP3 | 1.295 | 0.217 | 0.048 | 4.505 | 6.64E-06 | 3.29E-05 |
| RPS11 | 6.254 | 0.155 | 0.035 | 4.500 | 6.81E-06 | 3.37E-05 |
| RPS20 | 4.999 | 0.165 | 0.037 | 4.495 | 6.94E-06 | 3.43E-05 |
| ANP32A | 1.373 | 0.211 | 0.047 | 4.494 | 7.00E-06 | 3.45E-05 |
| ATP5G3 | 1.682 | 0.191 | 0.043 | 4.485 | 7.30E-06 | 3.59E-05 |
| CTB-61M7.2 | 1.158 | (0.221) | 0.049 | (4.481) | 7.44E-06 | 3.66E-05 |
| HNRNPA1 | 2.934 | 0.177 | 0.039 | 4.474 | 7.68E-06 | 3.77E-05 |
| TBCB | 1.212 | 0.223 | 0.050 | 4.467 | 7.92E-06 | 3.88E-05 |
| PLSCR1 | 1.337 | 0.210 | 0.047 | 4.465 | 8.02E-06 | 3.92E-05 |
| CHMP2A | 1.350 | 0.211 | 0.047 | 4.460 | 8.19E-06 | 4.00E-05 |
| SOD2 | 1.670 | 0.188 | 0.042 | 4.451 | 8.55E-06 | 4.17E-05 |
| NDFIP1 | 1.287 | 0.214 | 0.048 | 4.443 | 8.87E-06 | 4.32E-05 |
| SCIMP | 1.204 | 0.224 | 0.051 | 4.440 | 9.00E-06 | 4.38E-05 |
| TCIRG1 | 1.273 | 0.216 | 0.049 | 4.426 | 9.61E-06 | 4.66E-05 |
| LMAN2 | 1.210 | 0.219 | 0.050 | 4.419 | 9.92E-06 | 4.81E-05 |
| DPYSL2 | 1.363 | 0.208 | 0.047 | 4.418 | 9.95E-06 | 4.81E-05 |
| LILRB3 | 1.264 | 0.216 | 0.049 | 4.418 | 9.96E-06 | 4.81E-05 |
| SRGN | 7.260 | 0.162 | 0.037 | 4.412 | 1.02E-05 | 4.94E-05 |
| RCSD1 | 1.291 | 0.213 | 0.048 | 4.409 | 1.04E-05 | 4.99E-05 |
| RGS19 | 1.305 | 0.216 | 0.049 | 4.402 | 1.07E-05 | 5.15E-05 |
| MT-ATP6 | 15.150 | 0.129 | 0.029 | 4.402 | 1.07E-05 | 5.15E-05 |
| MGEA5 | 1.229 | 0.218 | 0.049 | 4.401 | 1.08E-05 | 5.17E-05 |
| ARF1 | 1.411 | 0.204 | 0.046 | 4.398 | 1.09E-05 | 5.22E-05 |
| SNRPB2 | 1.420 | 0.203 | 0.046 | 4.395 | 1.11E-05 | 5.29E-05 |
| CHMP5 | 1.208 | 0.218 | 0.050 | 4.393 | 1.12E-05 | 5.34E-05 |
| RSRP1 | 1.305 | 0.215 | 0.049 | 4.383 | 1.17E-05 | 5.58E-05 |
| MAP3K1 | 1.234 | 0.216 | 0.049 | 4.379 | 1.19E-05 | 5.68E-05 |
| ZNF706 | 1.384 | 0.207 | 0.047 | 4.378 | 1.20E-05 | 5.70E-05 |
| TBXAS1 | 1.217 | 0.218 | 0.050 | 4.377 | 1.21E-05 | 5.72E-05 |
| NAAA | 1.352 | 0.211 | 0.048 | 4.376 | 1.21E-05 | 5.74E-05 |
| ITGAL | 1.177 | 0.222 | 0.051 | 4.375 | 1.22E-05 | 5.76E-05 |
| SRSF3 | 1.714 | 0.184 | 0.042 | 4.369 | 1.25E-05 | 5.90E-05 |
| ARL5A | 1.327 | 0.207 | 0.047 | 4.368 | 1.25E-05 | 5.92E-05 |
| SEC11A | 1.821 | 0.180 | 0.041 | 4.365 | 1.27E-05 | 5.99E-05 |
| ARHGDIA | 1.354 | 0.204 | 0.047 | 4.356 | 1.32E-05 | 6.22E-05 |
| NUMB | 1.315 | 0.209 | 0.048 | 4.353 | 1.34E-05 | 6.32E-05 |
| TIMP2 | 1.282 | 0.209 | 0.048 | 4.346 | 1.39E-05 | 6.52E-05 |
| LDHA | 1.556 | 0.190 | 0.044 | 4.342 | 1.41E-05 | 6.63E-05 |
| SSB | 1.241 | 0.214 | 0.049 | 4.338 | 1.44E-05 | 6.74E-05 |
| ATPIF1 | 1.342 | 0.204 | 0.047 | 4.331 | 1.48E-05 | 6.92E-05 |
| NCKAP1L | 1.294 | 0.210 | 0.049 | 4.328 | 1.51E-05 | 7.03E-05 |
| UBE2I | 1.301 | 0.208 | 0.048 | 4.324 | 1.53E-05 | 7.14E-05 |
| CALM3 | 1.370 | 0.202 | 0.047 | 4.322 | 1.55E-05 | 7.21E-05 |
| RBM25 | 1.364 | 0.203 | 0.047 | 4.319 | 1.57E-05 | 7.29E-05 |
| IL1B | 1.271 | 0.207 | 0.048 | 4.315 | 1.59E-05 | 7.40E-05 |
| MINOS1 | 1.717 | 0.184 | 0.043 | 4.310 | 1.64E-05 | 7.58E-05 |
| EIF1B | 1.308 | 0.206 | 0.048 | 4.308 | 1.65E-05 | 7.61E-05 |
| BANF1 | 1.314 | 0.208 | 0.048 | 4.295 | 1.75E-05 | 8.08E-05 |
| EID1 | 1.490 | 0.193 | 0.045 | 4.286 | 1.82E-05 | 8.38E-05 |
| UBE2L6 | 1.170 | 0.216 | 0.050 | 4.279 | 1.87E-05 | 8.64E-05 |
| FCGR2A | 1.330 | 0.207 | 0.049 | 4.255 | 2.09E-05 | 9.60E-05 |
| MGST1 | 1.462 | 0.189 | 0.045 | 4.252 | 2.12E-05 | 9.73E-05 |
| 9-Sep | 1.290 | 0.207 | 0.049 | 4.245 | 2.18E-05 | 1.00E-04 |
| TRIM38 | 1.238 | 0.210 | 0.049 | 4.243 | 2.21E-05 | 1.01E-04 |
| TNRC6B | 1.261 | 0.208 | 0.049 | 4.235 | 2.29E-05 | 1.05E-04 |
| SNU13 | 1.356 | 0.199 | 0.047 | 4.231 | 2.33E-05 | 1.06E-04 |
| CREB5 | 1.187 | 0.211 | 0.050 | 4.229 | 2.35E-05 | 1.07E-04 |
| RSL1D1 | 1.345 | 0.201 | 0.048 | 4.226 | 2.38E-05 | 1.09E-04 |
| CD47 | 1.282 | 0.207 | 0.049 | 4.224 | 2.40E-05 | 1.09E-04 |
| ATP6AP2 | 1.509 | 0.189 | 0.045 | 4.220 | 2.44E-05 | 1.11E-04 |
| SHFM1 | 1.411 | 0.195 | 0.046 | 4.213 | 2.52E-05 | 1.14E-04 |
| CSNK2B | 1.356 | 0.198 | 0.047 | 4.212 | 2.53E-05 | 1.15E-04 |
| C6orf48 | 1.329 | 0.200 | 0.047 | 4.205 | 2.61E-05 | 1.18E-04 |
| SOD1 | 1.387 | 0.200 | 0.048 | 4.200 | 2.67E-05 | 1.20E-04 |
| DOCK8 | 1.320 | 0.202 | 0.048 | 4.200 | 2.67E-05 | 1.20E-04 |
| GIMAP2 | 1.172 | 0.212 | 0.050 | 4.195 | 2.72E-05 | 1.23E-04 |
| ALOX5AP | 1.310 | (0.192) | 0.046 | (4.189) | 2.81E-05 | 1.26E-04 |
| BTG2 | 1.219 | 0.209 | 0.050 | 4.187 | 2.82E-05 | 1.27E-04 |
| NDUFB7 | 1.567 | 0.183 | 0.044 | 4.184 | 2.86E-05 | 1.28E-04 |
| EIF4A1 | 1.299 | 0.201 | 0.048 | 4.177 | 2.96E-05 | 1.33E-04 |
| MX2 | 1.179 | 0.209 | 0.050 | 4.162 | 3.15E-05 | 1.41E-04 |
| EIF6 | 1.272 | 0.202 | 0.049 | 4.158 | 3.21E-05 | 1.44E-04 |
| ZNHIT1 | 1.401 | 0.192 | 0.046 | 4.156 | 3.24E-05 | 1.44E-04 |
| LILRB1 | 1.166 | 0.211 | 0.051 | 4.155 | 3.25E-05 | 1.45E-04 |
| FERMT3 | 1.224 | 0.205 | 0.049 | 4.153 | 3.28E-05 | 1.46E-04 |
| IL32 | 1.111 | 0.213 | 0.051 | 4.146 | 3.39E-05 | 1.50E-04 |
| CELF2 | 1.507 | 0.185 | 0.045 | 4.144 | 3.41E-05 | 1.51E-04 |
| SLC25A5 | 1.681 | 0.179 | 0.043 | 4.142 | 3.44E-05 | 1.52E-04 |
| DPP7 | 1.254 | 0.202 | 0.049 | 4.137 | 3.52E-05 | 1.56E-04 |
| ATP5G1 | 1.288 | 0.198 | 0.048 | 4.132 | 3.59E-05 | 1.59E-04 |
| PSMA1 | 1.451 | 0.187 | 0.045 | 4.127 | 3.68E-05 | 1.62E-04 |
| CAST | 1.569 | 0.182 | 0.044 | 4.125 | 3.71E-05 | 1.63E-04 |
| RGS10 | 1.403 | 0.191 | 0.046 | 4.125 | 3.71E-05 | 1.63E-04 |
| MTPN | 1.485 | 0.186 | 0.045 | 4.125 | 3.72E-05 | 1.63E-04 |
| SNHG8 | 1.372 | 0.196 | 0.048 | 4.116 | 3.85E-05 | 1.69E-04 |
| MT1X | 1.261 | 0.201 | 0.049 | 4.113 | 3.90E-05 | 1.71E-04 |
| VDAC1 | 1.265 | 0.200 | 0.049 | 4.109 | 3.97E-05 | 1.74E-04 |
| PPP2R5C | 1.238 | 0.203 | 0.049 | 4.105 | 4.04E-05 | 1.77E-04 |
| NDUFB10 | 1.467 | 0.184 | 0.045 | 4.102 | 4.09E-05 | 1.78E-04 |
| CCL5 | 1.108 | 0.212 | 0.052 | 4.101 | 4.12E-05 | 1.79E-04 |
| SLC2A3 | 1.526 | (0.174) | 0.042 | (4.100) | 4.13E-05 | 1.80E-04 |
| RAB8A | 1.174 | 0.207 | 0.051 | 4.095 | 4.22E-05 | 1.83E-04 |
| OAZ2 | 1.236 | 0.203 | 0.050 | 4.087 | 4.37E-05 | 1.90E-04 |
| HNRNPA3 | 1.628 | 0.176 | 0.043 | 4.085 | 4.41E-05 | 1.91E-04 |
| IFIT1 | 1.085 | 0.210 | 0.052 | 4.080 | 4.50E-05 | 1.95E-04 |
| GLRX | 1.702 | 0.173 | 0.042 | 4.079 | 4.53E-05 | 1.96E-04 |
| SLC16A3 | 1.251 | 0.201 | 0.049 | 4.077 | 4.56E-05 | 1.97E-04 |
| ANKRD12 | 1.261 | 0.201 | 0.049 | 4.075 | 4.59E-05 | 1.98E-04 |
| PRCP | 1.199 | 0.203 | 0.050 | 4.075 | 4.60E-05 | 1.98E-04 |
| SPCS1 | 1.570 | 0.177 | 0.044 | 4.064 | 4.82E-05 | 2.07E-04 |
| TMEM165 | 1.271 | 0.198 | 0.049 | 4.064 | 4.83E-05 | 2.07E-04 |
| TLN1 | 1.275 | 0.197 | 0.049 | 4.055 | 5.02E-05 | 2.15E-04 |
| CALM1 | 1.757 | 0.170 | 0.042 | 4.051 | 5.10E-05 | 2.18E-04 |
| CDC42SE1 | 1.307 | 0.194 | 0.048 | 4.043 | 5.27E-05 | 2.25E-04 |
| AC004556.1 | 1.095 | 0.208 | 0.052 | 4.037 | 5.41E-05 | 2.31E-04 |
| ATP6V1B2 | 1.349 | 0.192 | 0.047 | 4.036 | 5.43E-05 | 2.32E-04 |
| NUCB1 | 1.190 | 0.202 | 0.050 | 4.035 | 5.46E-05 | 2.33E-04 |
| C1orf56 | 1.200 | 0.202 | 0.050 | 4.017 | 5.91E-05 | 2.51E-04 |
| CASP4 | 1.285 | 0.195 | 0.049 | 3.999 | 6.36E-05 | 2.70E-04 |
| RNF149 | 1.402 | 0.187 | 0.047 | 3.986 | 6.71E-05 | 2.85E-04 |
| EIF2S2 | 1.413 | 0.184 | 0.046 | 3.986 | 6.73E-05 | 2.85E-04 |
| SF3B1 | 1.335 | 0.190 | 0.048 | 3.985 | 6.76E-05 | 2.86E-04 |
| REL | 1.301 | 0.191 | 0.048 | 3.982 | 6.83E-05 | 2.89E-04 |
| PARVG | 1.240 | 0.196 | 0.049 | 3.979 | 6.92E-05 | 2.93E-04 |
| ASGR1 | 1.306 | 0.190 | 0.048 | 3.977 | 6.97E-05 | 2.94E-04 |
| TMEM230 | 1.285 | 0.191 | 0.048 | 3.969 | 7.23E-05 | 3.05E-04 |
| CTSA | 1.271 | 0.190 | 0.048 | 3.967 | 7.27E-05 | 3.06E-04 |
| FPR1 | 1.393 | 0.181 | 0.046 | 3.966 | 7.32E-05 | 3.08E-04 |
| TCOF1 | 1.198 | 0.199 | 0.050 | 3.965 | 7.34E-05 | 3.08E-04 |
| WIPF1 | 1.269 | 0.193 | 0.049 | 3.963 | 7.39E-05 | 3.10E-04 |
| CHMP4A | 1.253 | 0.193 | 0.049 | 3.953 | 7.73E-05 | 3.24E-04 |
| COX17 | 1.358 | 0.187 | 0.047 | 3.950 | 7.82E-05 | 3.27E-04 |
| DBNL | 1.301 | 0.191 | 0.048 | 3.947 | 7.92E-05 | 3.31E-04 |
| PSMG2 | 1.253 | 0.193 | 0.049 | 3.941 | 8.12E-05 | 3.39E-04 |
| IFI35 | 1.165 | 0.199 | 0.050 | 3.938 | 8.21E-05 | 3.42E-04 |
| METTL9 | 1.664 | (0.164) | 0.042 | (3.930) | 8.51E-05 | 3.54E-04 |
| MKRN1 | 1.260 | 0.193 | 0.049 | 3.923 | 8.74E-05 | 3.63E-04 |
| FIS1 | 1.313 | 0.187 | 0.048 | 3.919 | 8.89E-05 | 3.69E-04 |
| UQCRB | 3.553 | 0.143 | 0.037 | 3.907 | 9.36E-05 | 3.88E-04 |
| CTSH | 1.363 | 0.184 | 0.047 | 3.903 | 9.51E-05 | 3.94E-04 |
| UBE2J1 | 1.263 | 0.188 | 0.048 | 3.894 | 9.86E-05 | 4.08E-04 |
| CDKN1C | 1.156 | 0.200 | 0.052 | 3.886 | 1.02E-04 | 4.20E-04 |
| HNRNPH1 | 1.492 | 0.174 | 0.045 | 3.881 | 1.04E-04 | 4.29E-04 |
| SERBP1 | 1.365 | 0.183 | 0.047 | 3.877 | 1.06E-04 | 4.35E-04 |
| RARRES3 | 1.195 | 0.194 | 0.050 | 3.872 | 1.08E-04 | 4.45E-04 |
| CD83 | 1.205 | 0.188 | 0.048 | 3.871 | 1.08E-04 | 4.45E-04 |
| PLD3 | 1.221 | 0.191 | 0.049 | 3.871 | 1.08E-04 | 4.45E-04 |
| DMXL2 | 1.235 | 0.190 | 0.049 | 3.866 | 1.11E-04 | 4.54E-04 |
| UQCRC1 | 1.288 | 0.185 | 0.048 | 3.865 | 1.11E-04 | 4.54E-04 |
| DYNLRB1 | 1.250 | 0.189 | 0.049 | 3.865 | 1.11E-04 | 4.54E-04 |
| C19orf38 | 1.279 | 0.187 | 0.048 | 3.861 | 1.13E-04 | 4.60E-04 |
| BIN2 | 1.196 | 0.194 | 0.050 | 3.846 | 1.20E-04 | 4.89E-04 |
| FNBP1 | 1.271 | 0.187 | 0.049 | 3.845 | 1.21E-04 | 4.91E-04 |
| HM13 | 1.196 | 0.192 | 0.050 | 3.837 | 1.25E-04 | 5.07E-04 |
| MS4A4A | 1.145 | 0.195 | 0.051 | 3.834 | 1.26E-04 | 5.12E-04 |
| NMI | 1.220 | 0.189 | 0.049 | 3.832 | 1.27E-04 | 5.16E-04 |
| MTSS1 | 1.153 | 0.196 | 0.051 | 3.828 | 1.29E-04 | 5.22E-04 |
| LSM7 | 1.412 | 0.176 | 0.046 | 3.828 | 1.29E-04 | 5.22E-04 |
| PRDX6 | 1.294 | 0.183 | 0.048 | 3.823 | 1.32E-04 | 5.32E-04 |
| COMT | 1.220 | 0.188 | 0.049 | 3.821 | 1.33E-04 | 5.36E-04 |
| RPL21 | 16.136 | 0.133 | 0.035 | 3.817 | 1.35E-04 | 5.44E-04 |
| TXN | 1.660 | 0.160 | 0.042 | 3.816 | 1.36E-04 | 5.46E-04 |
| TNFRSF1A | 1.193 | 0.191 | 0.050 | 3.812 | 1.38E-04 | 5.55E-04 |
| TCF7L2 | 1.175 | 0.193 | 0.051 | 3.807 | 1.41E-04 | 5.65E-04 |
| TMED2 | 1.278 | 0.184 | 0.048 | 3.803 | 1.43E-04 | 5.73E-04 |
| SCP2 | 1.350 | 0.179 | 0.047 | 3.795 | 1.47E-04 | 5.91E-04 |
| SRP9 | 1.324 | 0.182 | 0.048 | 3.795 | 1.48E-04 | 5.91E-04 |
| C12orf57 | 1.539 | 0.169 | 0.045 | 3.790 | 1.51E-04 | 6.02E-04 |
| NAA38 | 1.512 | 0.170 | 0.045 | 3.785 | 1.54E-04 | 6.13E-04 |
| EIF5A | 1.396 | 0.177 | 0.047 | 3.782 | 1.56E-04 | 6.21E-04 |
| OAS2 | 1.110 | 0.194 | 0.051 | 3.781 | 1.56E-04 | 6.21E-04 |
| RNASEK | 1.124 | 0.194 | 0.051 | 3.779 | 1.58E-04 | 6.27E-04 |
| LILRA2 | 1.193 | 0.189 | 0.050 | 3.776 | 1.59E-04 | 6.32E-04 |
| PRKCB | 1.474 | 0.168 | 0.045 | 3.768 | 1.65E-04 | 6.53E-04 |
| PRKAR1A | 1.300 | 0.182 | 0.048 | 3.766 | 1.66E-04 | 6.58E-04 |
| CXCR4 | 1.411 | (0.166) | 0.044 | (3.761) | 1.69E-04 | 6.70E-04 |
| NDUFV2 | 1.247 | 0.183 | 0.049 | 3.746 | 1.79E-04 | 7.09E-04 |
| PSMB6 | 1.270 | 0.181 | 0.048 | 3.742 | 1.83E-04 | 7.22E-04 |
| MAPK1 | 1.253 | 0.181 | 0.048 | 3.732 | 1.90E-04 | 7.50E-04 |
| MYEOV2 | 1.462 | 0.169 | 0.045 | 3.722 | 1.97E-04 | 7.78E-04 |
| SHISA5 | 1.156 | 0.188 | 0.051 | 3.721 | 1.98E-04 | 7.80E-04 |
| VEGFA | 1.083 | (0.190) | 0.051 | (3.716) | 2.02E-04 | 7.95E-04 |
| TRAM1 | 1.284 | 0.179 | 0.048 | 3.703 | 2.13E-04 | 8.36E-04 |
| CKLF | 1.642 | 0.160 | 0.043 | 3.700 | 2.15E-04 | 8.43E-04 |
| LRRK2 | 1.312 | 0.178 | 0.048 | 3.699 | 2.17E-04 | 8.48E-04 |
| RTN3 | 1.369 | 0.173 | 0.047 | 3.698 | 2.17E-04 | 8.49E-04 |
| SH3GLB1 | 1.289 | 0.178 | 0.048 | 3.695 | 2.20E-04 | 8.58E-04 |
| PSMA3 | 1.221 | 0.182 | 0.049 | 3.693 | 2.21E-04 | 8.63E-04 |
| NDUFS7 | 1.442 | 0.168 | 0.046 | 3.690 | 2.24E-04 | 8.74E-04 |
| ZNF385A | 1.199 | 0.183 | 0.050 | 3.688 | 2.26E-04 | 8.80E-04 |
| M6PR | 1.305 | 0.179 | 0.049 | 3.688 | 2.26E-04 | 8.80E-04 |
| DEK | 1.355 | 0.174 | 0.047 | 3.684 | 2.29E-04 | 8.91E-04 |
| CLEC10A | 1.107 | 0.190 | 0.052 | 3.683 | 2.30E-04 | 8.92E-04 |
| TRAF3IP3 | 1.207 | 0.185 | 0.050 | 3.679 | 2.34E-04 | 9.07E-04 |
| ATP5J | 1.473 | 0.166 | 0.045 | 3.672 | 2.41E-04 | 9.32E-04 |
| PAK2 | 1.303 | 0.176 | 0.048 | 3.670 | 2.43E-04 | 9.38E-04 |
| GNAS | 1.377 | 0.172 | 0.047 | 3.663 | 2.50E-04 | 9.63E-04 |
| VPS28 | 1.401 | 0.170 | 0.046 | 3.654 | 2.58E-04 | 9.96E-04 |
| LRP1 | 1.209 | 0.182 | 0.050 | 3.652 | 2.61E-04 | 1.00E-03 |
| ZNF90 | 1.305 | (0.177) | 0.049 | (3.647) | 2.65E-04 | 1.02E-03 |
| RHEB | 1.253 | 0.177 | 0.049 | 3.644 | 2.68E-04 | 1.03E-03 |
| THEMIS2 | 1.269 | 0.178 | 0.049 | 3.644 | 2.68E-04 | 1.03E-03 |
| PICALM | 1.265 | 0.176 | 0.048 | 3.640 | 2.73E-04 | 1.04E-03 |
| NDUFA11 | 1.803 | 0.149 | 0.041 | 3.633 | 2.80E-04 | 1.07E-03 |
| C3AR1 | 1.144 | 0.183 | 0.050 | 3.632 | 2.81E-04 | 1.07E-03 |
| GLIPR1 | 1.816 | 0.149 | 0.041 | 3.627 | 2.87E-04 | 1.10E-03 |
| POLR2L | 2.096 | 0.137 | 0.038 | 3.623 | 2.91E-04 | 1.11E-03 |
| SFT2D1 | 1.360 | 0.169 | 0.047 | 3.621 | 2.94E-04 | 1.12E-03 |
| PSMD4 | 1.224 | 0.179 | 0.049 | 3.620 | 2.95E-04 | 1.12E-03 |
| ICAM2 | 1.155 | 0.185 | 0.051 | 3.619 | 2.96E-04 | 1.12E-03 |
| TMEM167A | 1.508 | 0.159 | 0.044 | 3.605 | 3.12E-04 | 1.18E-03 |
| PHPT1 | 1.313 | 0.171 | 0.048 | 3.600 | 3.19E-04 | 1.21E-03 |
| RPLP1 | 21.792 | 0.120 | 0.033 | 3.598 | 3.21E-04 | 1.22E-03 |
| SELL | 1.727 | 0.148 | 0.041 | 3.595 | 3.24E-04 | 1.23E-03 |
| HN1 | 1.348 | 0.171 | 0.048 | 3.579 | 3.45E-04 | 1.31E-03 |
| EREG | 1.202 | (0.174) | 0.049 | (3.566) | 3.62E-04 | 1.37E-03 |
| AES | 1.212 | 0.175 | 0.049 | 3.556 | 3.76E-04 | 1.42E-03 |
| GGNBP2 | 1.252 | 0.173 | 0.049 | 3.554 | 3.79E-04 | 1.43E-03 |
| TCF25 | 1.307 | 0.170 | 0.048 | 3.554 | 3.79E-04 | 1.43E-03 |
| PCGF5 | 1.194 | 0.178 | 0.050 | 3.553 | 3.80E-04 | 1.43E-03 |
| PSMD8 | 1.207 | 0.177 | 0.050 | 3.545 | 3.93E-04 | 1.48E-03 |
| SSU72 | 1.228 | 0.173 | 0.049 | 3.541 | 3.98E-04 | 1.49E-03 |
| TMCO1 | 1.223 | 0.175 | 0.049 | 3.540 | 4.01E-04 | 1.50E-03 |
| NDUFS8 | 1.316 | 0.167 | 0.047 | 3.539 | 4.02E-04 | 1.50E-03 |
| GPBAR1 | 1.167 | 0.180 | 0.051 | 3.528 | 4.18E-04 | 1.56E-03 |
| DRAM2 | 1.260 | 0.173 | 0.049 | 3.526 | 4.23E-04 | 1.58E-03 |
| STX7 | 1.203 | 0.177 | 0.050 | 3.525 | 4.23E-04 | 1.58E-03 |
| YWHAE | 1.441 | 0.160 | 0.046 | 3.520 | 4.31E-04 | 1.61E-03 |
| TPP1 | 1.490 | 0.157 | 0.044 | 3.520 | 4.32E-04 | 1.61E-03 |
| HSPA1A | 1.166 | 0.179 | 0.051 | 3.519 | 4.33E-04 | 1.61E-03 |
| CHCHD2 | 2.090 | 0.137 | 0.039 | 3.519 | 4.34E-04 | 1.61E-03 |
| RPS17 | 7.286 | 0.130 | 0.037 | 3.515 | 4.40E-04 | 1.63E-03 |
| HNRNPF | 1.344 | 0.167 | 0.047 | 3.515 | 4.41E-04 | 1.63E-03 |
| RAB5C | 1.227 | 0.174 | 0.050 | 3.512 | 4.44E-04 | 1.64E-03 |
| ADRBK1 | 1.271 | 0.171 | 0.049 | 3.510 | 4.48E-04 | 1.65E-03 |
| PTPN18 | 1.197 | 0.175 | 0.050 | 3.508 | 4.52E-04 | 1.67E-03 |
| CSDE1 | 1.430 | 0.161 | 0.046 | 3.508 | 4.52E-04 | 1.67E-03 |
| ERP44 | 1.237 | 0.173 | 0.050 | 3.501 | 4.64E-04 | 1.71E-03 |
| CYCS | 1.332 | 0.165 | 0.047 | 3.495 | 4.75E-04 | 1.74E-03 |
| NFKBID | 1.095 | 0.180 | 0.051 | 3.495 | 4.75E-04 | 1.74E-03 |
| ATP5F1 | 1.514 | 0.155 | 0.044 | 3.491 | 4.81E-04 | 1.77E-03 |
| LAMP2 | 1.248 | 0.169 | 0.049 | 3.490 | 4.83E-04 | 1.77E-03 |
| ABRACL | 1.570 | 0.156 | 0.045 | 3.486 | 4.90E-04 | 1.79E-03 |
| NDUFC2 | 1.355 | 0.165 | 0.047 | 3.485 | 4.92E-04 | 1.80E-03 |
| RALY | 1.218 | 0.173 | 0.050 | 3.485 | 4.92E-04 | 1.80E-03 |
| POLR2J3 | 1.200 | 0.177 | 0.051 | 3.485 | 4.93E-04 | 1.80E-03 |
| TMEM160 | 1.315 | 0.165 | 0.047 | 3.484 | 4.94E-04 | 1.80E-03 |
| PHACTR1 | 1.227 | (0.168) | 0.048 | (3.483) | 4.96E-04 | 1.81E-03 |
| ATOX1 | 1.378 | 0.162 | 0.046 | 3.482 | 4.97E-04 | 1.81E-03 |
| CDC42SE2 | 1.206 | 0.173 | 0.050 | 3.479 | 5.03E-04 | 1.83E-03 |
| AP2M1 | 1.241 | 0.171 | 0.049 | 3.476 | 5.09E-04 | 1.84E-03 |
| PPP1R18 | 1.260 | 0.170 | 0.049 | 3.476 | 5.09E-04 | 1.84E-03 |
| NDUFB4 | 1.328 | 0.165 | 0.048 | 3.472 | 5.16E-04 | 1.87E-03 |
| UBE2B | 1.295 | 0.167 | 0.048 | 3.467 | 5.26E-04 | 1.90E-03 |
| GBP2 | 1.134 | 0.177 | 0.051 | 3.463 | 5.33E-04 | 1.93E-03 |
| OS9 | 1.190 | 0.173 | 0.050 | 3.456 | 5.49E-04 | 1.98E-03 |
| SRRM1 | 1.448 | 0.159 | 0.046 | 3.454 | 5.52E-04 | 1.99E-03 |
| LUC7L3 | 1.255 | 0.170 | 0.049 | 3.452 | 5.56E-04 | 2.00E-03 |
| POLR2E | 1.195 | 0.171 | 0.050 | 3.452 | 5.57E-04 | 2.00E-03 |
| TAOK3 | 1.272 | 0.168 | 0.049 | 3.447 | 5.66E-04 | 2.03E-03 |
| NOTCH2 | 1.223 | 0.171 | 0.050 | 3.442 | 5.78E-04 | 2.07E-03 |
| VPS35 | 1.333 | 0.165 | 0.048 | 3.439 | 5.84E-04 | 2.09E-03 |
| TUFM | 1.309 | 0.164 | 0.048 | 3.435 | 5.92E-04 | 2.12E-03 |
| CYTIP | 1.309 | 0.166 | 0.048 | 3.433 | 5.96E-04 | 2.13E-03 |
| SLC43A2 | 1.253 | 0.166 | 0.048 | 3.422 | 6.22E-04 | 2.22E-03 |
| FKBP2 | 1.239 | 0.167 | 0.049 | 3.419 | 6.29E-04 | 2.24E-03 |
| DDT | 1.367 | 0.159 | 0.047 | 3.414 | 6.39E-04 | 2.28E-03 |
| BASP1 | 1.131 | (0.171) | 0.050 | (3.414) | 6.39E-04 | 2.28E-03 |
| NDUFB11 | 1.647 | 0.144 | 0.042 | 3.410 | 6.49E-04 | 2.31E-03 |
| POLR2J | 1.280 | 0.165 | 0.049 | 3.409 | 6.53E-04 | 2.32E-03 |
| COX7B | 2.186 | 0.129 | 0.038 | 3.406 | 6.59E-04 | 2.34E-03 |
| SH3BP2 | 1.235 | 0.168 | 0.049 | 3.406 | 6.60E-04 | 2.34E-03 |
| ACAP2 | 1.293 | 0.165 | 0.048 | 3.405 | 6.61E-04 | 2.34E-03 |
| C7orf50 | 1.171 | 0.171 | 0.050 | 3.405 | 6.63E-04 | 2.34E-03 |
| SCAND1 | 1.523 | 0.151 | 0.044 | 3.403 | 6.65E-04 | 2.35E-03 |
| MYDGF | 1.224 | 0.167 | 0.049 | 3.401 | 6.70E-04 | 2.37E-03 |
| IER5 | 1.194 | 0.169 | 0.050 | 3.401 | 6.71E-04 | 2.37E-03 |
| KMT2E | 1.301 | 0.164 | 0.048 | 3.398 | 6.78E-04 | 2.39E-03 |
| LARP7 | 1.255 | 0.166 | 0.049 | 3.393 | 6.92E-04 | 2.43E-03 |
| PABPN1 | 1.194 | 0.169 | 0.050 | 3.392 | 6.95E-04 | 2.44E-03 |
| TLE4 | 1.302 | 0.163 | 0.048 | 3.388 | 7.03E-04 | 2.47E-03 |
| MAPKAPK3 | 1.204 | 0.169 | 0.050 | 3.383 | 7.17E-04 | 2.51E-03 |
| RASGRP2 | 1.204 | 0.168 | 0.050 | 3.376 | 7.35E-04 | 2.57E-03 |
| NDUFS6 | 1.557 | 0.149 | 0.044 | 3.375 | 7.38E-04 | 2.58E-03 |
| SMCO4 | 1.306 | 0.161 | 0.048 | 3.375 | 7.39E-04 | 2.58E-03 |
| UFM1 | 1.214 | 0.166 | 0.050 | 3.362 | 7.74E-04 | 2.70E-03 |
| METTL7A | 1.195 | 0.168 | 0.050 | 3.356 | 7.91E-04 | 2.76E-03 |
| IKZF1 | 1.235 | 0.166 | 0.049 | 3.353 | 7.99E-04 | 2.78E-03 |
| MTDH | 1.473 | 0.150 | 0.045 | 3.345 | 8.22E-04 | 2.86E-03 |
| CCZ1 | 1.153 | 0.170 | 0.051 | 3.342 | 8.33E-04 | 2.89E-03 |
| HNRNPU | 1.572 | 0.147 | 0.044 | 3.338 | 8.44E-04 | 2.93E-03 |
| LEPROTL1 | 1.246 | 0.163 | 0.049 | 3.337 | 8.47E-04 | 2.94E-03 |
| ZFAND5 | 1.691 | (0.136) | 0.041 | (3.332) | 8.61E-04 | 2.98E-03 |
| POLR2K | 1.218 | 0.165 | 0.049 | 3.330 | 8.69E-04 | 3.01E-03 |
| ANAPC16 | 1.458 | 0.152 | 0.046 | 3.327 | 8.79E-04 | 3.04E-03 |
| TNFSF13B | 1.799 | 0.135 | 0.041 | 3.326 | 8.83E-04 | 3.05E-03 |
| PGLS | 1.621 | 0.146 | 0.044 | 3.323 | 8.92E-04 | 3.08E-03 |
| PRMT2 | 1.196 | 0.167 | 0.050 | 3.322 | 8.93E-04 | 3.08E-03 |
| RPS5 | 3.857 | 0.128 | 0.039 | 3.320 | 9.02E-04 | 3.10E-03 |
| PSENEN | 1.180 | 0.167 | 0.050 | 3.316 | 9.13E-04 | 3.14E-03 |
| CREBRF | 1.156 | 0.168 | 0.051 | 3.313 | 9.22E-04 | 3.17E-03 |
| H2AFY | 1.885 | 0.133 | 0.040 | 3.313 | 9.23E-04 | 3.17E-03 |
| CD300A | 1.143 | 0.170 | 0.051 | 3.312 | 9.28E-04 | 3.18E-03 |
| PARP9 | 1.113 | 0.171 | 0.052 | 3.311 | 9.31E-04 | 3.19E-03 |
| TWF2 | 1.200 | 0.166 | 0.050 | 3.310 | 9.32E-04 | 3.19E-03 |
| MYADM | 1.387 | 0.152 | 0.046 | 3.307 | 9.43E-04 | 3.22E-03 |
| FAM96B | 1.252 | 0.161 | 0.049 | 3.306 | 9.47E-04 | 3.23E-03 |
| LY86 | 1.451 | 0.151 | 0.046 | 3.305 | 9.49E-04 | 3.24E-03 |
| HLA-DQA2 | 1.149 | 0.168 | 0.051 | 3.302 | 9.60E-04 | 3.27E-03 |
| STX10 | 1.241 | 0.162 | 0.049 | 3.301 | 9.65E-04 | 3.28E-03 |
| CAPN2 | 1.288 | 0.158 | 0.048 | 3.300 | 9.68E-04 | 3.29E-03 |
| C6orf62 | 1.309 | 0.156 | 0.047 | 3.292 | 9.93E-04 | 3.37E-03 |
| CEBPD | 1.364 | 0.152 | 0.046 | 3.289 | 1.00E-03 | 3.41E-03 |
| CORO1B | 1.168 | 0.167 | 0.051 | 3.284 | 1.02E-03 | 3.47E-03 |
| NT5C3A | 1.119 | 0.168 | 0.051 | 3.278 | 1.05E-03 | 3.54E-03 |
| SMAP2 | 1.302 | 0.156 | 0.048 | 3.275 | 1.06E-03 | 3.57E-03 |
| LACTB | 1.185 | 0.165 | 0.050 | 3.274 | 1.06E-03 | 3.58E-03 |
| WDR1 | 1.325 | 0.156 | 0.048 | 3.274 | 1.06E-03 | 3.58E-03 |
| CLEC4A | 1.375 | 0.153 | 0.047 | 3.271 | 1.07E-03 | 3.61E-03 |
| RPN1 | 1.223 | 0.161 | 0.049 | 3.271 | 1.07E-03 | 3.62E-03 |
| ID2 | 1.723 | 0.138 | 0.042 | 3.264 | 1.10E-03 | 3.69E-03 |
| PAPOLA | 1.387 | 0.152 | 0.047 | 3.264 | 1.10E-03 | 3.69E-03 |
| WDR11 | 1.157 | 0.166 | 0.051 | 3.263 | 1.10E-03 | 3.70E-03 |
| KIAA1033 | 1.186 | 0.164 | 0.050 | 3.262 | 1.10E-03 | 3.70E-03 |
| CIR1 | 1.199 | 0.163 | 0.050 | 3.262 | 1.11E-03 | 3.71E-03 |
| ROCK1 | 1.282 | 0.157 | 0.048 | 3.258 | 1.12E-03 | 3.76E-03 |
| SRSF11 | 1.328 | 0.154 | 0.047 | 3.256 | 1.13E-03 | 3.78E-03 |
| LNPEP | 1.149 | 0.165 | 0.051 | 3.254 | 1.14E-03 | 3.80E-03 |
| NDUFC1 | 1.191 | 0.163 | 0.050 | 3.252 | 1.15E-03 | 3.82E-03 |
| SAMD9L | 1.110 | 0.167 | 0.051 | 3.250 | 1.15E-03 | 3.84E-03 |
| GBP1 | 1.105 | 0.167 | 0.051 | 3.250 | 1.15E-03 | 3.84E-03 |
| UFC1 | 1.260 | 0.158 | 0.049 | 3.242 | 1.19E-03 | 3.95E-03 |
| MYD88 | 1.214 | 0.161 | 0.050 | 3.242 | 1.19E-03 | 3.95E-03 |
| AUP1 | 1.177 | 0.163 | 0.050 | 3.240 | 1.19E-03 | 3.97E-03 |
| ZBTB7A | 1.201 | 0.161 | 0.050 | 3.240 | 1.20E-03 | 3.97E-03 |
| EIF3F | 1.533 | 0.145 | 0.045 | 3.238 | 1.20E-03 | 3.98E-03 |
| SF3B5 | 1.497 | 0.144 | 0.045 | 3.235 | 1.22E-03 | 4.03E-03 |
| DAD1 | 1.287 | 0.157 | 0.048 | 3.233 | 1.23E-03 | 4.05E-03 |
| LCP2 | 1.251 | 0.158 | 0.049 | 3.232 | 1.23E-03 | 4.06E-03 |
| TMEM154 | 1.200 | 0.162 | 0.050 | 3.230 | 1.24E-03 | 4.09E-03 |
| BUD31 | 1.226 | 0.160 | 0.049 | 3.228 | 1.25E-03 | 4.11E-03 |
| TM9SF2 | 1.247 | 0.159 | 0.049 | 3.227 | 1.25E-03 | 4.12E-03 |
| SLC2A6 | 1.137 | 0.165 | 0.051 | 3.216 | 1.30E-03 | 4.27E-03 |
| KRAS | 1.164 | 0.162 | 0.050 | 3.216 | 1.30E-03 | 4.27E-03 |
| LYST | 1.556 | 0.144 | 0.045 | 3.213 | 1.31E-03 | 4.31E-03 |
| PCSK7 | 1.180 | 0.162 | 0.050 | 3.212 | 1.32E-03 | 4.32E-03 |
| YWHAQ | 1.224 | 0.159 | 0.049 | 3.211 | 1.32E-03 | 4.33E-03 |
| NRROS | 1.126 | 0.165 | 0.051 | 3.208 | 1.34E-03 | 4.37E-03 |
| EIF2AK2 | 1.123 | 0.164 | 0.051 | 3.208 | 1.34E-03 | 4.38E-03 |
| SSNA1 | 1.222 | 0.160 | 0.050 | 3.207 | 1.34E-03 | 4.38E-03 |
| JTB | 1.474 | 0.144 | 0.045 | 3.203 | 1.36E-03 | 4.43E-03 |
| EIF1 | 5.983 | 0.113 | 0.035 | 3.199 | 1.38E-03 | 4.50E-03 |
| ATRAID | 1.235 | 0.158 | 0.049 | 3.193 | 1.41E-03 | 4.59E-03 |
| C9orf72 | 1.238 | 0.156 | 0.049 | 3.192 | 1.41E-03 | 4.60E-03 |
| DOCK2 | 1.265 | 0.156 | 0.049 | 3.187 | 1.44E-03 | 4.68E-03 |
| SMIM7 | 1.213 | 0.159 | 0.050 | 3.185 | 1.45E-03 | 4.69E-03 |
| KLF3 | 1.222 | 0.159 | 0.050 | 3.185 | 1.45E-03 | 4.69E-03 |
| TANK | 1.177 | 0.160 | 0.050 | 3.183 | 1.46E-03 | 4.72E-03 |
| SPAG7 | 1.147 | 0.162 | 0.051 | 3.183 | 1.46E-03 | 4.72E-03 |
| PYURF | 1.296 | 0.152 | 0.048 | 3.180 | 1.47E-03 | 4.77E-03 |
| C14orf166 | 1.468 | 0.145 | 0.046 | 3.178 | 1.48E-03 | 4.79E-03 |
| RPL26 | 12.975 | 0.110 | 0.035 | 3.177 | 1.49E-03 | 4.81E-03 |
| SET | 1.475 | 0.144 | 0.045 | 3.176 | 1.49E-03 | 4.81E-03 |
| MRPL23 | 1.314 | 0.151 | 0.048 | 3.175 | 1.50E-03 | 4.83E-03 |
| SRI | 1.270 | 0.154 | 0.048 | 3.171 | 1.52E-03 | 4.88E-03 |
| TGOLN2 | 1.355 | 0.149 | 0.047 | 3.163 | 1.56E-03 | 5.02E-03 |
| SF3B2 | 1.242 | 0.156 | 0.049 | 3.163 | 1.56E-03 | 5.02E-03 |
| YWHAH | 1.157 | 0.160 | 0.050 | 3.162 | 1.56E-03 | 5.02E-03 |
| RPS24 | 12.882 | (0.102) | 0.032 | (3.160) | 1.58E-03 | 5.05E-03 |
| GABARAPL1 | 1.159 | (0.157) | 0.050 | (3.159) | 1.58E-03 | 5.07E-03 |
| P2RY13 | 1.149 | 0.161 | 0.051 | 3.155 | 1.60E-03 | 5.13E-03 |
| STK10 | 1.160 | 0.160 | 0.051 | 3.150 | 1.63E-03 | 5.22E-03 |
| CYTH4 | 1.167 | 0.160 | 0.051 | 3.147 | 1.65E-03 | 5.28E-03 |
| CAMK1 | 1.143 | 0.161 | 0.051 | 3.145 | 1.66E-03 | 5.31E-03 |
| LSM5 | 1.305 | 0.149 | 0.047 | 3.141 | 1.68E-03 | 5.36E-03 |
| CLTA | 1.456 | 0.143 | 0.045 | 3.140 | 1.69E-03 | 5.38E-03 |
| KTN1 | 1.286 | 0.152 | 0.048 | 3.137 | 1.71E-03 | 5.43E-03 |
| CD79B | 1.137 | 0.161 | 0.052 | 3.130 | 1.75E-03 | 5.55E-03 |
| RPS4X | 6.972 | 0.116 | 0.037 | 3.130 | 1.75E-03 | 5.55E-03 |
| ADCY7 | 1.164 | 0.158 | 0.051 | 3.124 | 1.78E-03 | 5.65E-03 |
| AURKAIP1 | 1.352 | 0.147 | 0.047 | 3.123 | 1.79E-03 | 5.66E-03 |
| CDK2AP2 | 1.137 | 0.159 | 0.051 | 3.122 | 1.80E-03 | 5.68E-03 |
| CREG1 | 1.220 | 0.152 | 0.049 | 3.118 | 1.82E-03 | 5.75E-03 |
| DNAJA1 | 1.217 | 0.155 | 0.050 | 3.112 | 1.86E-03 | 5.87E-03 |
| LPAR6 | 1.137 | 0.160 | 0.051 | 3.102 | 1.92E-03 | 6.06E-03 |
| POLR2B | 1.151 | 0.159 | 0.051 | 3.101 | 1.93E-03 | 6.08E-03 |
| LILRA1 | 1.174 | 0.156 | 0.051 | 3.089 | 2.01E-03 | 6.32E-03 |
| C9orf78 | 1.225 | 0.153 | 0.049 | 3.084 | 2.04E-03 | 6.42E-03 |
| FCER1A | 1.117 | 0.160 | 0.052 | 3.082 | 2.06E-03 | 6.47E-03 |
| CYC1 | 1.220 | 0.152 | 0.049 | 3.081 | 2.06E-03 | 6.47E-03 |
| MDM4 | 1.274 | 0.150 | 0.049 | 3.078 | 2.08E-03 | 6.54E-03 |
| MRPL20 | 1.274 | 0.149 | 0.048 | 3.076 | 2.10E-03 | 6.58E-03 |
| PRAM1 | 1.270 | 0.149 | 0.048 | 3.075 | 2.10E-03 | 6.59E-03 |
| NDUFB3 | 1.349 | 0.145 | 0.047 | 3.072 | 2.13E-03 | 6.65E-03 |
| HADHA | 1.307 | 0.147 | 0.048 | 3.065 | 2.17E-03 | 6.79E-03 |
| YIPF4 | 1.177 | 0.155 | 0.051 | 3.065 | 2.17E-03 | 6.79E-03 |
| EHBP1L1 | 1.134 | 0.156 | 0.051 | 3.065 | 2.18E-03 | 6.79E-03 |
| HNRNPM | 1.350 | 0.144 | 0.047 | 3.059 | 2.22E-03 | 6.92E-03 |
| ATP1A1 | 1.183 | 0.153 | 0.050 | 3.059 | 2.22E-03 | 6.92E-03 |
| COX14 | 1.241 | 0.150 | 0.049 | 3.057 | 2.24E-03 | 6.96E-03 |
| MEAF6 | 1.183 | 0.153 | 0.050 | 3.056 | 2.24E-03 | 6.96E-03 |
| C20orf24 | 1.456 | 0.140 | 0.046 | 3.056 | 2.24E-03 | 6.96E-03 |
| SP110 | 1.132 | 0.157 | 0.051 | 3.053 | 2.26E-03 | 7.02E-03 |
| CUX1 | 1.236 | 0.151 | 0.049 | 3.047 | 2.31E-03 | 7.17E-03 |
| TAX1BP1 | 1.356 | 0.144 | 0.047 | 3.043 | 2.35E-03 | 7.26E-03 |
| SSBP1 | 1.425 | 0.139 | 0.046 | 3.037 | 2.39E-03 | 7.39E-03 |
| PA2G4 | 1.223 | 0.150 | 0.049 | 3.035 | 2.41E-03 | 7.43E-03 |
| BAZ1A | 1.299 | 0.147 | 0.049 | 3.035 | 2.41E-03 | 7.43E-03 |
| MYH9 | 1.392 | 0.140 | 0.046 | 3.034 | 2.41E-03 | 7.43E-03 |
| HNRNPR | 1.224 | 0.150 | 0.050 | 3.033 | 2.42E-03 | 7.46E-03 |
| IDH3G | 1.201 | 0.151 | 0.050 | 3.032 | 2.43E-03 | 7.47E-03 |
| AKR1A1 | 1.206 | 0.151 | 0.050 | 3.028 | 2.46E-03 | 7.58E-03 |
| MIS18BP1 | 1.236 | 0.150 | 0.050 | 3.028 | 2.47E-03 | 7.58E-03 |
| ACSL1 | 1.161 | (0.148) | 0.049 | (3.022) | 2.51E-03 | 7.72E-03 |
| P4HB | 1.269 | 0.145 | 0.048 | 3.021 | 2.52E-03 | 7.72E-03 |
| H2AFZ | 1.792 | 0.125 | 0.041 | 3.021 | 2.52E-03 | 7.72E-03 |
| PFDN2 | 1.195 | 0.151 | 0.050 | 3.017 | 2.55E-03 | 7.81E-03 |
| POLR2F | 1.197 | 0.150 | 0.050 | 3.016 | 2.56E-03 | 7.84E-03 |
| BTF3L4 | 1.195 | 0.150 | 0.050 | 3.014 | 2.57E-03 | 7.87E-03 |
| C4orf3 | 1.620 | 0.131 | 0.043 | 3.013 | 2.59E-03 | 7.90E-03 |
| SCPEP1 | 1.423 | 0.137 | 0.046 | 3.011 | 2.61E-03 | 7.95E-03 |
| FAM105A | 1.195 | 0.150 | 0.050 | 3.009 | 2.62E-03 | 7.98E-03 |
| RIN3 | 1.226 | 0.148 | 0.049 | 3.009 | 2.63E-03 | 7.99E-03 |
| HHEX | 1.149 | 0.154 | 0.051 | 3.006 | 2.65E-03 | 8.05E-03 |
| SERINC1 | 1.187 | 0.150 | 0.050 | 3.004 | 2.67E-03 | 8.10E-03 |
| SNX6 | 1.188 | 0.150 | 0.050 | 3.000 | 2.70E-03 | 8.19E-03 |
| WAC | 1.253 | 0.146 | 0.049 | 3.000 | 2.70E-03 | 8.19E-03 |
| TMEM147 | 1.215 | 0.149 | 0.050 | 2.999 | 2.71E-03 | 8.20E-03 |
| CANX | 1.363 | 0.140 | 0.047 | 2.999 | 2.71E-03 | 8.20E-03 |
| RPS3A | 12.180 | 0.110 | 0.037 | 2.997 | 2.72E-03 | 8.24E-03 |
| ACADVL | 1.158 | 0.151 | 0.050 | 2.992 | 2.77E-03 | 8.38E-03 |
| MFSD1 | 1.299 | 0.143 | 0.048 | 2.991 | 2.78E-03 | 8.38E-03 |
| OXA1L | 1.213 | 0.148 | 0.050 | 2.987 | 2.82E-03 | 8.49E-03 |
| FAM49A | 1.185 | 0.150 | 0.050 | 2.987 | 2.82E-03 | 8.49E-03 |
| PARK7 | 1.364 | 0.140 | 0.047 | 2.986 | 2.82E-03 | 8.50E-03 |
| PSMB2 | 1.236 | 0.146 | 0.049 | 2.983 | 2.85E-03 | 8.59E-03 |
| MBP | 1.180 | 0.150 | 0.050 | 2.978 | 2.90E-03 | 8.71E-03 |
| SULT1A1 | 1.233 | 0.146 | 0.049 | 2.977 | 2.91E-03 | 8.73E-03 |
| CLEC4E | 1.212 | (0.145) | 0.049 | (2.977) | 2.91E-03 | 8.73E-03 |
| SRSF2 | 1.445 | 0.136 | 0.046 | 2.975 | 2.93E-03 | 8.77E-03 |
| SPG21 | 1.333 | 0.140 | 0.047 | 2.975 | 2.93E-03 | 8.77E-03 |
| SNRPB | 1.300 | 0.143 | 0.048 | 2.972 | 2.96E-03 | 8.85E-03 |
| EIF5B | 1.204 | 0.148 | 0.050 | 2.971 | 2.97E-03 | 8.86E-03 |
| IFI27L2 | 1.418 | 0.134 | 0.045 | 2.971 | 2.97E-03 | 8.86E-03 |
| GPBP1 | 1.214 | 0.147 | 0.050 | 2.968 | 3.00E-03 | 8.95E-03 |
| GHITM | 1.334 | 0.141 | 0.047 | 2.967 | 3.01E-03 | 8.96E-03 |
| PAK1 | 1.206 | 0.148 | 0.050 | 2.966 | 3.02E-03 | 8.98E-03 |
| MRPL52 | 1.338 | 0.140 | 0.047 | 2.966 | 3.02E-03 | 8.99E-03 |
| ENSA | 1.255 | 0.145 | 0.049 | 2.963 | 3.05E-03 | 9.05E-03 |
| BACH1 | 1.194 | 0.148 | 0.050 | 2.959 | 3.08E-03 | 9.15E-03 |
| TNFRSF14 | 1.179 | 0.149 | 0.050 | 2.958 | 3.09E-03 | 9.17E-03 |
| CCR1 | 1.183 | 0.147 | 0.050 | 2.953 | 3.15E-03 | 9.34E-03 |
| NR4A2 | 1.186 | (0.147) | 0.050 | (2.948) | 3.19E-03 | 9.46E-03 |
| SP100 | 1.211 | 0.146 | 0.050 | 2.946 | 3.22E-03 | 9.53E-03 |
| UGP2 | 1.168 | 0.148 | 0.050 | 2.945 | 3.23E-03 | 9.55E-03 |
| DICER1 | 1.179 | 0.147 | 0.050 | 2.940 | 3.28E-03 | 9.69E-03 |
| LILRA5 | 1.427 | 0.136 | 0.046 | 2.939 | 3.29E-03 | 9.71E-03 |
| GADD45GIP1 | 1.290 | 0.141 | 0.048 | 2.935 | 3.33E-03 | 9.82E-03 |
| RBCK1 | 1.134 | 0.150 | 0.051 | 2.933 | 3.36E-03 | 9.88E-03 |
| VAMP2 | 1.359 | 0.137 | 0.047 | 2.932 | 3.37E-03 | 9.90E-03 |
| PTAFR | 1.151 | 0.148 | 0.051 | 2.932 | 3.37E-03 | 9.90E-03 |
| LSM4 | 1.226 | 0.145 | 0.049 | 2.927 | 3.42E-03 | 1.01E-02 |
| MBD2 | 1.251 | 0.143 | 0.049 | 2.927 | 3.43E-03 | 1.01E-02 |
| SASH3 | 1.163 | 0.148 | 0.051 | 2.922 | 3.48E-03 | 1.02E-02 |
| CCDC88A | 1.232 | 0.144 | 0.049 | 2.920 | 3.50E-03 | 1.03E-02 |
| HERPUD1 | 1.455 | 0.133 | 0.046 | 2.919 | 3.51E-03 | 1.03E-02 |
| SF1 | 1.344 | 0.138 | 0.047 | 2.917 | 3.53E-03 | 1.03E-02 |
| PPP1CC | 1.234 | 0.143 | 0.049 | 2.917 | 3.54E-03 | 1.03E-02 |
| UNC93B1 | 1.138 | 0.149 | 0.051 | 2.914 | 3.57E-03 | 1.04E-02 |
| NFE2L2 | 1.195 | 0.145 | 0.050 | 2.907 | 3.64E-03 | 1.06E-02 |
| BNIP3L | 1.342 | 0.137 | 0.047 | 2.903 | 3.70E-03 | 1.08E-02 |
| KYNU | 1.175 | 0.146 | 0.050 | 2.901 | 3.72E-03 | 1.08E-02 |
| DNAJB6 | 1.308 | 0.138 | 0.048 | 2.898 | 3.76E-03 | 1.09E-02 |
| NARS | 1.165 | 0.146 | 0.050 | 2.896 | 3.78E-03 | 1.10E-02 |
| MRPL57 | 1.210 | 0.143 | 0.050 | 2.889 | 3.87E-03 | 1.12E-02 |
| NDUFV3 | 1.161 | 0.145 | 0.050 | 2.887 | 3.89E-03 | 1.13E-02 |
| GNB1 | 1.269 | 0.140 | 0.049 | 2.887 | 3.89E-03 | 1.13E-02 |
| ARHGEF1 | 1.149 | 0.147 | 0.051 | 2.886 | 3.90E-03 | 1.13E-02 |
| SEPW1 | 1.231 | 0.143 | 0.050 | 2.883 | 3.94E-03 | 1.14E-02 |
| EIF4EBP1 | 1.304 | 0.138 | 0.048 | 2.878 | 4.00E-03 | 1.16E-02 |
| ATM | 1.177 | 0.145 | 0.051 | 2.875 | 4.04E-03 | 1.17E-02 |
| PRDX3 | 1.298 | 0.136 | 0.047 | 2.873 | 4.07E-03 | 1.17E-02 |
| HBD | 1.121 | 0.143 | 0.050 | 2.873 | 4.07E-03 | 1.17E-02 |
| PPIG | 1.313 | 0.137 | 0.048 | 2.872 | 4.08E-03 | 1.17E-02 |
| NCL | 1.436 | 0.132 | 0.046 | 2.869 | 4.11E-03 | 1.18E-02 |
| XRCC5 | 1.263 | 0.140 | 0.049 | 2.866 | 4.16E-03 | 1.19E-02 |
| LSM14A | 1.209 | 0.141 | 0.049 | 2.865 | 4.17E-03 | 1.20E-02 |
| ENY2 | 1.573 | 0.126 | 0.044 | 2.863 | 4.20E-03 | 1.20E-02 |
| CDKN1A | 1.157 | 0.143 | 0.050 | 2.860 | 4.24E-03 | 1.22E-02 |
| QKI | 1.303 | 0.137 | 0.048 | 2.859 | 4.25E-03 | 1.22E-02 |
| ATF6B | 1.154 | 0.145 | 0.051 | 2.855 | 4.30E-03 | 1.23E-02 |
| SAMD9 | 1.103 | 0.148 | 0.052 | 2.854 | 4.32E-03 | 1.23E-02 |
| PIK3AP1 | 1.211 | 0.142 | 0.050 | 2.853 | 4.32E-03 | 1.24E-02 |
| PKN1 | 1.165 | 0.144 | 0.051 | 2.847 | 4.41E-03 | 1.26E-02 |
| ARGLU1 | 1.303 | 0.137 | 0.048 | 2.845 | 4.44E-03 | 1.27E-02 |
| S1PR4 | 1.164 | 0.146 | 0.051 | 2.843 | 4.47E-03 | 1.27E-02 |
| PTPN2 | 1.223 | 0.141 | 0.050 | 2.843 | 4.47E-03 | 1.27E-02 |
| MRPL54 | 1.293 | 0.135 | 0.048 | 2.842 | 4.48E-03 | 1.28E-02 |
| G6PD | 1.156 | 0.143 | 0.050 | 2.841 | 4.49E-03 | 1.28E-02 |
| UPF2 | 1.173 | 0.143 | 0.051 | 2.837 | 4.55E-03 | 1.29E-02 |
| MAT2B | 1.164 | 0.143 | 0.051 | 2.835 | 4.59E-03 | 1.30E-02 |
| DNAJC7 | 1.267 | 0.138 | 0.049 | 2.834 | 4.60E-03 | 1.30E-02 |
| RBBP4 | 1.203 | 0.141 | 0.050 | 2.833 | 4.61E-03 | 1.31E-02 |
| DPEP2 | 1.136 | 0.145 | 0.051 | 2.829 | 4.66E-03 | 1.32E-02 |
| ARF3 | 1.171 | 0.142 | 0.050 | 2.829 | 4.67E-03 | 1.32E-02 |
| ODF3B | 1.225 | 0.138 | 0.049 | 2.828 | 4.68E-03 | 1.32E-02 |
| PLXNB2 | 1.161 | 0.143 | 0.051 | 2.825 | 4.73E-03 | 1.33E-02 |
| SECTM1 | 1.101 | 0.147 | 0.052 | 2.825 | 4.73E-03 | 1.33E-02 |
| HNRNPA0 | 1.289 | 0.136 | 0.048 | 2.824 | 4.75E-03 | 1.34E-02 |
| PIM3 | 1.092 | 0.145 | 0.051 | 2.823 | 4.76E-03 | 1.34E-02 |
| MRPL41 | 1.268 | 0.136 | 0.048 | 2.819 | 4.81E-03 | 1.35E-02 |
| CLTC | 1.215 | 0.139 | 0.049 | 2.818 | 4.83E-03 | 1.36E-02 |
| ACTG1 | 3.857 | 0.102 | 0.036 | 2.817 | 4.85E-03 | 1.36E-02 |
| DYNC1I2 | 1.257 | 0.138 | 0.049 | 2.815 | 4.87E-03 | 1.37E-02 |
| RXRA | 1.235 | 0.139 | 0.050 | 2.814 | 4.89E-03 | 1.37E-02 |
| CNOT7 | 1.184 | 0.141 | 0.050 | 2.814 | 4.90E-03 | 1.37E-02 |
| LRPAP1 | 1.190 | 0.140 | 0.050 | 2.809 | 4.96E-03 | 1.39E-02 |
| LINC00152 | 1.230 | 0.138 | 0.049 | 2.808 | 4.98E-03 | 1.39E-02 |
| IGLC2 | 1.109 | 0.144 | 0.051 | 2.807 | 4.99E-03 | 1.39E-02 |
| FKBP15 | 1.134 | 0.144 | 0.051 | 2.806 | 5.02E-03 | 1.40E-02 |
| PRRC2C | 1.308 | 0.134 | 0.048 | 2.801 | 5.10E-03 | 1.42E-02 |
| FAM45A | 1.272 | 0.136 | 0.049 | 2.801 | 5.10E-03 | 1.42E-02 |
| BCL6 | 1.143 | 0.141 | 0.050 | 2.800 | 5.11E-03 | 1.42E-02 |
| KPNB1 | 1.153 | 0.142 | 0.051 | 2.798 | 5.15E-03 | 1.43E-02 |
| SNAP23 | 1.235 | 0.138 | 0.049 | 2.796 | 5.17E-03 | 1.44E-02 |
| GCH1 | 1.128 | 0.144 | 0.051 | 2.796 | 5.18E-03 | 1.44E-02 |
| MARCKSL1 | 1.178 | 0.142 | 0.051 | 2.795 | 5.19E-03 | 1.44E-02 |
| STAT6 | 1.151 | 0.142 | 0.051 | 2.794 | 5.20E-03 | 1.44E-02 |
| TRIM56 | 1.120 | 0.144 | 0.052 | 2.792 | 5.23E-03 | 1.45E-02 |
| POLR2G | 1.207 | 0.139 | 0.050 | 2.792 | 5.24E-03 | 1.45E-02 |
| NSA2 | 1.424 | 0.131 | 0.047 | 2.791 | 5.25E-03 | 1.45E-02 |
| BATF3 | 1.086 | 0.145 | 0.052 | 2.786 | 5.34E-03 | 1.48E-02 |
| NAPA | 1.152 | 0.141 | 0.051 | 2.782 | 5.40E-03 | 1.49E-02 |
| ICAM1 | 1.085 | 0.143 | 0.051 | 2.780 | 5.44E-03 | 1.50E-02 |
| RNPEP | 1.162 | 0.140 | 0.050 | 2.779 | 5.45E-03 | 1.50E-02 |
| ADPGK | 1.255 | 0.135 | 0.049 | 2.773 | 5.56E-03 | 1.53E-02 |
| WNK1 | 1.212 | 0.138 | 0.050 | 2.772 | 5.56E-03 | 1.53E-02 |
| NAPRT | 1.229 | 0.138 | 0.050 | 2.772 | 5.56E-03 | 1.53E-02 |
| SNX17 | 1.249 | 0.136 | 0.049 | 2.772 | 5.58E-03 | 1.53E-02 |
| ST13 | 1.330 | 0.133 | 0.048 | 2.770 | 5.60E-03 | 1.54E-02 |
| MT-ND4L | 1.939 | 0.112 | 0.040 | 2.769 | 5.63E-03 | 1.54E-02 |
| CNIH1 | 1.252 | 0.135 | 0.049 | 2.768 | 5.64E-03 | 1.54E-02 |
| AKAP13 | 1.329 | 0.131 | 0.047 | 2.767 | 5.66E-03 | 1.55E-02 |
| IL17RA | 1.240 | 0.136 | 0.049 | 2.763 | 5.73E-03 | 1.57E-02 |
| PGK1 | 1.844 | 0.114 | 0.041 | 2.762 | 5.75E-03 | 1.57E-02 |
| BCKDK | 1.117 | 0.141 | 0.051 | 2.759 | 5.79E-03 | 1.58E-02 |
| NOSIP | 1.161 | 0.139 | 0.050 | 2.757 | 5.84E-03 | 1.59E-02 |
| CUTA | 1.369 | 0.128 | 0.047 | 2.755 | 5.87E-03 | 1.60E-02 |
| ZC3H15 | 1.269 | 0.133 | 0.048 | 2.753 | 5.91E-03 | 1.61E-02 |
| MCEMP1 | 1.154 | (0.137) | 0.050 | (2.751) | 5.94E-03 | 1.62E-02 |
| BRD2 | 1.198 | 0.137 | 0.050 | 2.750 | 5.96E-03 | 1.62E-02 |
| FGD2 | 1.146 | 0.140 | 0.051 | 2.747 | 6.02E-03 | 1.63E-02 |
| CWC15 | 1.152 | 0.139 | 0.051 | 2.745 | 6.05E-03 | 1.64E-02 |
| ARL6IP1 | 1.209 | 0.136 | 0.050 | 2.741 | 6.13E-03 | 1.66E-02 |
| C17orf62 | 1.154 | 0.139 | 0.051 | 2.740 | 6.14E-03 | 1.66E-02 |
| BIRC6 | 1.168 | 0.138 | 0.050 | 2.738 | 6.18E-03 | 1.67E-02 |
| STAB1 | 1.136 | 0.139 | 0.051 | 2.737 | 6.19E-03 | 1.68E-02 |
| HMHA1 | 1.184 | 0.137 | 0.050 | 2.726 | 6.41E-03 | 1.73E-02 |
| FAM46A | 1.133 | 0.140 | 0.051 | 2.725 | 6.42E-03 | 1.73E-02 |
| ERAP2 | 1.098 | 0.141 | 0.052 | 2.721 | 6.50E-03 | 1.75E-02 |
| STAT2 | 1.159 | 0.138 | 0.051 | 2.719 | 6.54E-03 | 1.76E-02 |
| RSL24D1 | 1.487 | 0.123 | 0.045 | 2.718 | 6.58E-03 | 1.77E-02 |
| ECH1 | 1.171 | 0.136 | 0.050 | 2.715 | 6.64E-03 | 1.79E-02 |
| IK | 1.162 | 0.137 | 0.051 | 2.704 | 6.86E-03 | 1.84E-02 |
| RBM8A | 1.243 | 0.132 | 0.049 | 2.700 | 6.93E-03 | 1.86E-02 |
| FAM198B | 1.173 | 0.135 | 0.050 | 2.699 | 6.96E-03 | 1.87E-02 |
| HSPE1 | 1.267 | 0.132 | 0.049 | 2.693 | 7.07E-03 | 1.90E-02 |
| BLOC1S2 | 1.216 | 0.133 | 0.049 | 2.693 | 7.08E-03 | 1.90E-02 |
| SMCHD1 | 1.299 | 0.130 | 0.048 | 2.692 | 7.09E-03 | 1.90E-02 |
| DCP2 | 1.159 | 0.137 | 0.051 | 2.692 | 7.10E-03 | 1.90E-02 |
| COPS6 | 1.160 | 0.136 | 0.051 | 2.691 | 7.12E-03 | 1.90E-02 |
| WDR82 | 1.129 | 0.138 | 0.051 | 2.691 | 7.12E-03 | 1.90E-02 |
| SDHB | 1.178 | 0.134 | 0.050 | 2.679 | 7.38E-03 | 1.97E-02 |
| FBP1 | 1.123 | 0.137 | 0.051 | 2.679 | 7.38E-03 | 1.97E-02 |
| RAN | 1.398 | 0.124 | 0.046 | 2.679 | 7.39E-03 | 1.97E-02 |
| SRSF7 | 1.397 | 0.124 | 0.046 | 2.678 | 7.40E-03 | 1.97E-02 |
| PDCD6IP | 1.219 | 0.133 | 0.050 | 2.677 | 7.43E-03 | 1.98E-02 |
| LPP | 1.132 | 0.136 | 0.051 | 2.672 | 7.55E-03 | 2.01E-02 |
| RAD21 | 1.180 | 0.134 | 0.050 | 2.671 | 7.56E-03 | 2.01E-02 |
| SMDT1 | 1.469 | 0.119 | 0.045 | 2.669 | 7.60E-03 | 2.02E-02 |
| EIF1AY | 1.117 | 0.136 | 0.051 | 2.667 | 7.66E-03 | 2.03E-02 |
| HNRNPH2 | 1.183 | 0.133 | 0.050 | 2.666 | 7.67E-03 | 2.03E-02 |
| FOSL2 | 1.347 | (0.123) | 0.046 | (2.665) | 7.70E-03 | 2.04E-02 |
| LAMTOR5 | 1.434 | 0.122 | 0.046 | 2.663 | 7.74E-03 | 2.05E-02 |
| ASNA1 | 1.115 | 0.137 | 0.051 | 2.660 | 7.81E-03 | 2.06E-02 |
| RAB1A | 1.241 | 0.129 | 0.049 | 2.654 | 7.95E-03 | 2.10E-02 |
| LAMTOR1 | 1.544 | 0.117 | 0.044 | 2.652 | 8.00E-03 | 2.11E-02 |
| ASH1L | 1.163 | 0.134 | 0.051 | 2.652 | 8.01E-03 | 2.11E-02 |
| RBM47 | 1.213 | 0.130 | 0.049 | 2.648 | 8.09E-03 | 2.13E-02 |
| IL2RG | 1.108 | 0.136 | 0.051 | 2.645 | 8.16E-03 | 2.15E-02 |
| MTHFD2 | 1.146 | 0.133 | 0.050 | 2.644 | 8.19E-03 | 2.15E-02 |
| SNRPD3 | 1.259 | 0.130 | 0.049 | 2.644 | 8.20E-03 | 2.15E-02 |
| IRF2 | 1.143 | 0.136 | 0.051 | 2.644 | 8.20E-03 | 2.15E-02 |
| USP8 | 1.185 | 0.132 | 0.050 | 2.643 | 8.21E-03 | 2.15E-02 |
| PIAS1 | 1.178 | 0.133 | 0.050 | 2.643 | 8.21E-03 | 2.15E-02 |
| CDKN2D | 1.166 | 0.134 | 0.051 | 2.643 | 8.21E-03 | 2.15E-02 |
| FAM110A | 1.125 | 0.137 | 0.052 | 2.642 | 8.24E-03 | 2.16E-02 |
| NUDC | 1.137 | 0.134 | 0.051 | 2.637 | 8.37E-03 | 2.19E-02 |
| NAIP | 1.213 | 0.131 | 0.050 | 2.634 | 8.43E-03 | 2.20E-02 |
| SLC31A2 | 1.177 | 0.133 | 0.051 | 2.632 | 8.48E-03 | 2.21E-02 |
| TMEM256 | 1.296 | 0.126 | 0.048 | 2.632 | 8.50E-03 | 2.22E-02 |
| ADAM10 | 1.201 | 0.130 | 0.050 | 2.627 | 8.60E-03 | 2.24E-02 |
| TBC1D10C | 1.122 | 0.136 | 0.052 | 2.625 | 8.66E-03 | 2.26E-02 |
| SIGIRR | 1.173 | 0.132 | 0.050 | 2.624 | 8.70E-03 | 2.26E-02 |
| CMTM7 | 1.206 | 0.130 | 0.050 | 2.623 | 8.70E-03 | 2.26E-02 |
| PLAUR | 1.535 | (0.112) | 0.043 | (2.615) | 8.93E-03 | 2.32E-02 |
| YY1 | 1.224 | 0.128 | 0.049 | 2.614 | 8.96E-03 | 2.33E-02 |
| ANXA11 | 1.253 | 0.128 | 0.049 | 2.609 | 9.07E-03 | 2.35E-02 |
| OTUB1 | 1.151 | 0.132 | 0.051 | 2.606 | 9.16E-03 | 2.38E-02 |
| SNRPC | 1.176 | 0.131 | 0.050 | 2.605 | 9.19E-03 | 2.38E-02 |
| MDH2 | 1.215 | 0.129 | 0.050 | 2.602 | 9.26E-03 | 2.40E-02 |
| PAG1 | 1.157 | 0.131 | 0.051 | 2.601 | 9.30E-03 | 2.40E-02 |
| POLK | 1.132 | 0.133 | 0.051 | 2.598 | 9.37E-03 | 2.42E-02 |
| LINC00116 | 1.113 | 0.133 | 0.051 | 2.597 | 9.41E-03 | 2.43E-02 |
| BTG1 | 2.061 | 0.102 | 0.039 | 2.597 | 9.42E-03 | 2.43E-02 |
| RPL10A | 4.582 | 0.099 | 0.038 | 2.593 | 9.52E-03 | 2.46E-02 |
| AIP | 1.140 | 0.132 | 0.051 | 2.589 | 9.62E-03 | 2.48E-02 |
| PPP1R9B | 1.114 | 0.133 | 0.052 | 2.588 | 9.65E-03 | 2.48E-02 |
| NDUFS2 | 1.150 | 0.131 | 0.051 | 2.586 | 9.70E-03 | 2.49E-02 |
| MED4 | 1.160 | 0.131 | 0.051 | 2.586 | 9.70E-03 | 2.49E-02 |
| RAP2B | 1.220 | 0.127 | 0.049 | 2.586 | 9.72E-03 | 2.50E-02 |
| UBA3 | 1.122 | 0.133 | 0.051 | 2.584 | 9.77E-03 | 2.51E-02 |
| AP3S1 | 1.273 | 0.124 | 0.048 | 2.581 | 9.84E-03 | 2.52E-02 |
| KIAA0930 | 1.210 | 0.128 | 0.050 | 2.581 | 9.84E-03 | 2.52E-02 |
| CASP8 | 1.113 | 0.133 | 0.052 | 2.579 | 9.91E-03 | 2.54E-02 |
| BZW1 | 1.290 | 0.122 | 0.048 | 2.570 | 1.02E-02 | 2.60E-02 |
| TMEM30A | 1.170 | 0.129 | 0.050 | 2.568 | 1.02E-02 | 2.61E-02 |
| MIEN1 | 1.191 | 0.128 | 0.050 | 2.568 | 1.02E-02 | 2.62E-02 |
| HSPA5 | 1.329 | 0.121 | 0.047 | 2.567 | 1.03E-02 | 2.62E-02 |
| TMEM179B | 1.166 | 0.130 | 0.051 | 2.566 | 1.03E-02 | 2.62E-02 |
| ADI1 | 1.181 | 0.129 | 0.050 | 2.566 | 1.03E-02 | 2.62E-02 |
| EAPP | 1.147 | 0.130 | 0.051 | 2.565 | 1.03E-02 | 2.63E-02 |
| YBX3 | 1.284 | 0.124 | 0.048 | 2.565 | 1.03E-02 | 2.63E-02 |
| PRPF38B | 1.266 | 0.126 | 0.049 | 2.564 | 1.04E-02 | 2.63E-02 |
| HVCN1 | 1.115 | 0.132 | 0.052 | 2.563 | 1.04E-02 | 2.64E-02 |
| RPS8 | 7.590 | 0.096 | 0.037 | 2.556 | 1.06E-02 | 2.68E-02 |
| GIT2 | 1.156 | 0.130 | 0.051 | 2.554 | 1.06E-02 | 2.70E-02 |
| ARID4B | 1.192 | 0.128 | 0.050 | 2.551 | 1.07E-02 | 2.72E-02 |
| NDUFA12 | 1.243 | 0.126 | 0.049 | 2.550 | 1.08E-02 | 2.72E-02 |
| INSIG1 | 1.161 | 0.129 | 0.051 | 2.548 | 1.08E-02 | 2.74E-02 |
| MAGOH | 1.197 | 0.127 | 0.050 | 2.544 | 1.10E-02 | 2.77E-02 |
| FOXN3 | 1.196 | 0.126 | 0.050 | 2.541 | 1.11E-02 | 2.80E-02 |
| ADRM1 | 1.173 | 0.128 | 0.050 | 2.540 | 1.11E-02 | 2.80E-02 |
| CNN2 | 1.162 | 0.128 | 0.050 | 2.538 | 1.12E-02 | 2.82E-02 |
| MEF2A | 1.150 | 0.128 | 0.051 | 2.532 | 1.13E-02 | 2.86E-02 |
| APOL6 | 1.126 | 0.130 | 0.051 | 2.529 | 1.14E-02 | 2.88E-02 |
| CHMP3 | 1.188 | 0.127 | 0.050 | 2.529 | 1.14E-02 | 2.88E-02 |
| ADGRE2 | 1.148 | 0.130 | 0.051 | 2.529 | 1.15E-02 | 2.88E-02 |
| TMED9 | 1.159 | 0.128 | 0.051 | 2.529 | 1.15E-02 | 2.88E-02 |
| SEC62 | 1.439 | 0.115 | 0.046 | 2.528 | 1.15E-02 | 2.88E-02 |
| CES1 | 1.204 | 0.122 | 0.048 | 2.526 | 1.15E-02 | 2.90E-02 |
| MGST3 | 1.259 | 0.122 | 0.048 | 2.525 | 1.16E-02 | 2.90E-02 |
| EIF3A | 1.359 | 0.119 | 0.047 | 2.525 | 1.16E-02 | 2.90E-02 |
| DSTN | 1.206 | 0.126 | 0.050 | 2.518 | 1.18E-02 | 2.95E-02 |
| BCLAF1 | 1.305 | 0.121 | 0.048 | 2.518 | 1.18E-02 | 2.95E-02 |
| SFT2D2 | 1.134 | 0.129 | 0.051 | 2.518 | 1.18E-02 | 2.95E-02 |
| NDUFB5 | 1.377 | 0.117 | 0.047 | 2.517 | 1.18E-02 | 2.95E-02 |
| ARF6 | 1.520 | 0.111 | 0.044 | 2.515 | 1.19E-02 | 2.97E-02 |
| TXNDC12 | 1.176 | 0.127 | 0.051 | 2.514 | 1.19E-02 | 2.98E-02 |
| TFRC | 1.117 | (0.127) | 0.051 | (2.512) | 1.20E-02 | 2.99E-02 |
| OCIAD1 | 1.228 | 0.124 | 0.049 | 2.511 | 1.20E-02 | 3.00E-02 |
| DNAJC8 | 1.208 | 0.125 | 0.050 | 2.510 | 1.21E-02 | 3.00E-02 |
| ZNF106 | 1.257 | 0.123 | 0.049 | 2.510 | 1.21E-02 | 3.00E-02 |
| SRSF4 | 1.188 | 0.126 | 0.050 | 2.509 | 1.21E-02 | 3.00E-02 |
| 2-Sep | 1.219 | 0.124 | 0.049 | 2.509 | 1.21E-02 | 3.01E-02 |
| GPR65 | 1.168 | 0.127 | 0.051 | 2.507 | 1.22E-02 | 3.02E-02 |
| TIMM8B | 1.334 | 0.118 | 0.047 | 2.505 | 1.22E-02 | 3.03E-02 |
| ATF4 | 1.304 | 0.120 | 0.048 | 2.505 | 1.22E-02 | 3.03E-02 |
| UPP1 | 1.253 | (0.120) | 0.048 | (2.499) | 1.25E-02 | 3.08E-02 |
| RBM3 | 1.837 | 0.102 | 0.041 | 2.499 | 1.25E-02 | 3.08E-02 |
| XBP1 | 1.229 | 0.121 | 0.049 | 2.491 | 1.27E-02 | 3.15E-02 |
| CYLD | 1.160 | 0.125 | 0.050 | 2.490 | 1.28E-02 | 3.16E-02 |
| PRPF4B | 1.166 | 0.126 | 0.051 | 2.489 | 1.28E-02 | 3.16E-02 |
| SYTL1 | 1.112 | 0.128 | 0.052 | 2.489 | 1.28E-02 | 3.16E-02 |
| SSR1 | 1.317 | 0.118 | 0.047 | 2.486 | 1.29E-02 | 3.19E-02 |
| BNIP2 | 1.329 | 0.117 | 0.047 | 2.484 | 1.30E-02 | 3.20E-02 |
| C9orf142 | 1.193 | 0.123 | 0.050 | 2.482 | 1.31E-02 | 3.21E-02 |
| SLCO3A1 | 1.124 | 0.127 | 0.051 | 2.482 | 1.31E-02 | 3.21E-02 |
| LSM8 | 1.337 | 0.119 | 0.048 | 2.482 | 1.31E-02 | 3.21E-02 |
| TSC22D4 | 1.131 | 0.127 | 0.051 | 2.481 | 1.31E-02 | 3.22E-02 |
| ABTB1 | 1.157 | 0.126 | 0.051 | 2.480 | 1.31E-02 | 3.22E-02 |
| MAP3K11 | 1.117 | 0.128 | 0.052 | 2.479 | 1.32E-02 | 3.23E-02 |
| RNF114 | 1.155 | 0.125 | 0.051 | 2.479 | 1.32E-02 | 3.23E-02 |
| NBPF19 | 1.187 | 0.125 | 0.050 | 2.474 | 1.34E-02 | 3.27E-02 |
| CH17-189H20.1 | 1.119 | 0.127 | 0.051 | 2.474 | 1.34E-02 | 3.27E-02 |
| HP1BP3 | 1.213 | 0.123 | 0.050 | 2.474 | 1.34E-02 | 3.27E-02 |
| ANXA7 | 1.213 | 0.122 | 0.049 | 2.471 | 1.35E-02 | 3.29E-02 |
| PDLIM2 | 1.121 | 0.127 | 0.051 | 2.471 | 1.35E-02 | 3.29E-02 |
| RNASE2 | 1.378 | (0.111) | 0.045 | (2.467) | 1.36E-02 | 3.32E-02 |
| NDUFAF3 | 1.180 | 0.124 | 0.050 | 2.467 | 1.36E-02 | 3.32E-02 |
| AKNA | 1.129 | 0.127 | 0.051 | 2.465 | 1.37E-02 | 3.33E-02 |
| ACAA1 | 1.174 | 0.124 | 0.051 | 2.462 | 1.38E-02 | 3.36E-02 |
| NDUFS3 | 1.155 | 0.124 | 0.050 | 2.462 | 1.38E-02 | 3.36E-02 |
| ITGA4 | 1.115 | 0.127 | 0.052 | 2.461 | 1.38E-02 | 3.36E-02 |
| UQCRC2 | 1.268 | 0.119 | 0.048 | 2.460 | 1.39E-02 | 3.37E-02 |
| NMT1 | 1.121 | 0.127 | 0.052 | 2.460 | 1.39E-02 | 3.37E-02 |
| MVP | 1.151 | 0.126 | 0.051 | 2.460 | 1.39E-02 | 3.37E-02 |
| USP3 | 1.231 | 0.120 | 0.049 | 2.460 | 1.39E-02 | 3.37E-02 |
| AHR | 1.200 | 0.121 | 0.049 | 2.458 | 1.40E-02 | 3.38E-02 |
| ERCC1 | 1.158 | 0.124 | 0.051 | 2.457 | 1.40E-02 | 3.39E-02 |
| PLEC | 1.178 | 0.122 | 0.050 | 2.451 | 1.42E-02 | 3.44E-02 |
| PDIA6 | 1.279 | 0.118 | 0.048 | 2.450 | 1.43E-02 | 3.45E-02 |
| CHMP4B | 1.291 | 0.118 | 0.048 | 2.449 | 1.43E-02 | 3.45E-02 |
| RNF130 | 1.746 | 0.103 | 0.042 | 2.448 | 1.44E-02 | 3.46E-02 |
| OSCAR | 1.178 | 0.122 | 0.050 | 2.447 | 1.44E-02 | 3.47E-02 |
| LMO2 | 1.182 | 0.123 | 0.050 | 2.445 | 1.45E-02 | 3.48E-02 |
| PPP2R1A | 1.140 | 0.125 | 0.051 | 2.444 | 1.45E-02 | 3.49E-02 |
| LILRB4 | 1.119 | 0.124 | 0.051 | 2.440 | 1.47E-02 | 3.53E-02 |
| HMGN1 | 1.459 | 0.110 | 0.045 | 2.440 | 1.47E-02 | 3.53E-02 |
| EIF4E2 | 1.198 | 0.122 | 0.050 | 2.440 | 1.47E-02 | 3.53E-02 |
| XRCC6 | 1.224 | 0.121 | 0.050 | 2.438 | 1.48E-02 | 3.54E-02 |
| RNF166 | 1.135 | 0.124 | 0.051 | 2.437 | 1.48E-02 | 3.55E-02 |
| NADK | 1.165 | 0.124 | 0.051 | 2.436 | 1.49E-02 | 3.56E-02 |
| DEDD2 | 1.127 | 0.125 | 0.052 | 2.431 | 1.50E-02 | 3.60E-02 |
| PGAM1 | 1.676 | 0.103 | 0.043 | 2.429 | 1.51E-02 | 3.62E-02 |
| SDHD | 1.222 | 0.120 | 0.050 | 2.423 | 1.54E-02 | 3.68E-02 |
| CD302 | 1.506 | 0.109 | 0.045 | 2.421 | 1.55E-02 | 3.69E-02 |
| ERBB2IP | 1.172 | 0.122 | 0.050 | 2.420 | 1.55E-02 | 3.70E-02 |
| UBE2R2 | 1.239 | 0.118 | 0.049 | 2.419 | 1.56E-02 | 3.71E-02 |
| EPN1 | 1.136 | 0.124 | 0.051 | 2.419 | 1.56E-02 | 3.71E-02 |
| SERPINB9 | 1.125 | 0.123 | 0.051 | 2.414 | 1.58E-02 | 3.75E-02 |
| ZMAT2 | 1.242 | 0.117 | 0.049 | 2.407 | 1.61E-02 | 3.82E-02 |
| NUDT3 | 1.210 | 0.120 | 0.050 | 2.405 | 1.62E-02 | 3.84E-02 |
| RGS18 | 1.293 | 0.118 | 0.049 | 2.405 | 1.62E-02 | 3.84E-02 |
| ARRB1 | 1.117 | 0.124 | 0.051 | 2.405 | 1.62E-02 | 3.84E-02 |
| PLXDC2 | 1.216 | 0.118 | 0.049 | 2.403 | 1.63E-02 | 3.86E-02 |
| C15orf39 | 1.136 | 0.123 | 0.051 | 2.394 | 1.66E-02 | 3.95E-02 |
| XRN2 | 1.308 | 0.114 | 0.047 | 2.394 | 1.67E-02 | 3.95E-02 |
| ERICH1 | 1.254 | 0.118 | 0.049 | 2.394 | 1.67E-02 | 3.95E-02 |
| BTK | 1.144 | 0.122 | 0.051 | 2.393 | 1.67E-02 | 3.95E-02 |
| IL16 | 1.119 | 0.123 | 0.052 | 2.393 | 1.67E-02 | 3.95E-02 |
| SNX18 | 1.156 | 0.122 | 0.051 | 2.392 | 1.68E-02 | 3.96E-02 |
| RAB11FIP1 | 1.310 | 0.114 | 0.048 | 2.389 | 1.69E-02 | 3.98E-02 |
| PQLC3 | 1.180 | 0.120 | 0.050 | 2.389 | 1.69E-02 | 3.98E-02 |
| RALB | 1.150 | 0.122 | 0.051 | 2.389 | 1.69E-02 | 3.98E-02 |
| RNPEPL1 | 1.144 | 0.121 | 0.051 | 2.388 | 1.70E-02 | 3.99E-02 |
| CDV3 | 1.182 | 0.119 | 0.050 | 2.387 | 1.70E-02 | 3.99E-02 |
| C19orf60 | 1.299 | 0.114 | 0.048 | 2.386 | 1.70E-02 | 4.01E-02 |
| KIAA1551 | 1.129 | 0.123 | 0.051 | 2.385 | 1.71E-02 | 4.01E-02 |
| SMS | 1.225 | 0.117 | 0.049 | 2.381 | 1.72E-02 | 4.05E-02 |
| TMEM205 | 1.225 | 0.117 | 0.049 | 2.375 | 1.76E-02 | 4.12E-02 |
| EIF3M | 1.592 | 0.103 | 0.043 | 2.374 | 1.76E-02 | 4.13E-02 |
| PRPF40A | 1.214 | 0.117 | 0.049 | 2.373 | 1.76E-02 | 4.13E-02 |
| GCA | 1.510 | 0.105 | 0.045 | 2.366 | 1.80E-02 | 4.21E-02 |
| TAP1 | 1.098 | 0.123 | 0.052 | 2.366 | 1.80E-02 | 4.21E-02 |
| LRCH4 | 1.144 | 0.120 | 0.051 | 2.364 | 1.81E-02 | 4.23E-02 |
| SURF1 | 1.151 | 0.120 | 0.051 | 2.363 | 1.81E-02 | 4.23E-02 |
| RAD23A | 1.179 | 0.118 | 0.050 | 2.363 | 1.81E-02 | 4.23E-02 |
| CORO1C | 1.169 | 0.118 | 0.050 | 2.363 | 1.81E-02 | 4.23E-02 |
| NLRP3 | 1.186 | (0.114) | 0.048 | (2.358) | 1.84E-02 | 4.28E-02 |
| ZFAND6 | 1.218 | 0.116 | 0.049 | 2.357 | 1.84E-02 | 4.29E-02 |
| SCAMP2 | 1.122 | 0.121 | 0.051 | 2.356 | 1.85E-02 | 4.31E-02 |
| TLR4 | 1.138 | 0.119 | 0.051 | 2.350 | 1.88E-02 | 4.37E-02 |
| TXN2 | 1.176 | 0.117 | 0.050 | 2.347 | 1.89E-02 | 4.40E-02 |
| IMP3 | 1.135 | 0.121 | 0.052 | 2.344 | 1.91E-02 | 4.43E-02 |
| SDHC | 1.202 | 0.116 | 0.050 | 2.343 | 1.91E-02 | 4.44E-02 |
| PDCD10 | 1.138 | 0.120 | 0.051 | 2.342 | 1.92E-02 | 4.44E-02 |
| CNOT1 | 1.135 | 0.119 | 0.051 | 2.341 | 1.92E-02 | 4.45E-02 |
| LAMP1 | 1.215 | 0.115 | 0.049 | 2.341 | 1.92E-02 | 4.46E-02 |
| UBE2D2 | 1.266 | 0.114 | 0.049 | 2.340 | 1.93E-02 | 4.46E-02 |
| C16orf13 | 1.232 | 0.115 | 0.049 | 2.338 | 1.94E-02 | 4.48E-02 |
| C1orf43 | 1.233 | 0.115 | 0.049 | 2.338 | 1.94E-02 | 4.48E-02 |
| SKAP2 | 1.341 | 0.110 | 0.047 | 2.338 | 1.94E-02 | 4.48E-02 |
| PSEN1 | 1.126 | 0.120 | 0.051 | 2.337 | 1.94E-02 | 4.48E-02 |
| LSM10 | 1.175 | 0.118 | 0.051 | 2.337 | 1.95E-02 | 4.48E-02 |
| SLTM | 1.218 | 0.116 | 0.050 | 2.337 | 1.95E-02 | 4.48E-02 |
| SYAP1 | 1.130 | (0.118) | 0.050 | (2.336) | 1.95E-02 | 4.49E-02 |
| DTX3L | 1.092 | 0.121 | 0.052 | 2.333 | 1.97E-02 | 4.52E-02 |
| FAM96A | 1.305 | 0.112 | 0.048 | 2.333 | 1.97E-02 | 4.53E-02 |
| ADRBK2 | 1.160 | 0.118 | 0.051 | 2.331 | 1.98E-02 | 4.54E-02 |
| MSRB1 | 1.264 | 0.112 | 0.048 | 2.327 | 2.00E-02 | 4.58E-02 |
| PPP2CA | 1.200 | 0.115 | 0.050 | 2.327 | 2.00E-02 | 4.58E-02 |
| PHIP | 1.220 | 0.114 | 0.049 | 2.326 | 2.00E-02 | 4.59E-02 |
| CDA | 1.324 | 0.110 | 0.047 | 2.323 | 2.02E-02 | 4.63E-02 |
| SNX5 | 1.149 | 0.118 | 0.051 | 2.323 | 2.02E-02 | 4.63E-02 |
| THRAP3 | 1.159 | 0.118 | 0.051 | 2.322 | 2.03E-02 | 4.64E-02 |
| EML4 | 1.117 | 0.119 | 0.051 | 2.321 | 2.03E-02 | 4.64E-02 |
| RP6-159A1.4 | 1.234 | (0.111) | 0.048 | (2.320) | 2.04E-02 | 4.65E-02 |
| KCTD12 | 1.504 | 0.104 | 0.045 | 2.316 | 2.06E-02 | 4.70E-02 |
| PSMC3 | 1.132 | 0.119 | 0.051 | 2.314 | 2.07E-02 | 4.72E-02 |
| C7orf73 | 1.526 | 0.103 | 0.045 | 2.311 | 2.09E-02 | 4.76E-02 |
| MRPS34 | 1.213 | 0.115 | 0.050 | 2.309 | 2.09E-02 | 4.77E-02 |
| EIF3D | 1.250 | 0.113 | 0.049 | 2.307 | 2.11E-02 | 4.80E-02 |
| GIMAP1 | 1.120 | 0.119 | 0.052 | 2.306 | 2.11E-02 | 4.80E-02 |
| CCNDBP1 | 1.213 | 0.114 | 0.050 | 2.302 | 2.13E-02 | 4.85E-02 |
| SH2B3 | 1.207 | 0.115 | 0.050 | 2.300 | 2.15E-02 | 4.87E-02 |
| STARD7 | 1.137 | 0.117 | 0.051 | 2.300 | 2.15E-02 | 4.87E-02 |
| TNFAIP8 | 1.133 | 0.117 | 0.051 | 2.300 | 2.15E-02 | 4.87E-02 |
| PSMB8-AS1 | 1.165 | 0.117 | 0.051 | 2.299 | 2.15E-02 | 4.87E-02 |
| SERPINB6 | 1.211 | 0.113 | 0.049 | 2.298 | 2.15E-02 | 4.88E-02 |
| BLVRB | 1.685 | 0.095 | 0.042 | 2.297 | 2.16E-02 | 4.89E-02 |
| UBE2E3 | 1.146 | 0.117 | 0.051 | 2.296 | 2.17E-02 | 4.90E-02 |
| PSMC6 | 1.158 | 0.116 | 0.051 | 2.296 | 2.17E-02 | 4.90E-02 |
| ALOX5 | 1.204 | 0.115 | 0.050 | 2.295 | 2.18E-02 | 4.92E-02 |
| SH3BP5 | 1.109 | (0.116) | 0.051 | (2.294) | 2.18E-02 | 4.92E-02 |
| RASSF5 | 1.193 | 0.114 | 0.050 | 2.291 | 2.20E-02 | 4.96E-02 |
| GLUL | 1.579 | 0.098 | 0.043 | 2.289 | 2.21E-02 | 4.98E-02 |
| JAK1 | 1.262 | 0.112 | 0.049 | 2.289 | 2.21E-02 | 4.98E-02 |
| SRSF1 | 1.145 | 0.117 | 0.051 | 2.288 | 2.22E-02 | 4.99E-02 |
| DDX18 | 1.221 | 0.114 | 0.050 | 2.287 | 2.22E-02 | 4.99E-02 |

| **S8 Table.** 482 Monocyte-related candidate genes | | | | |
| --- | --- | --- | --- | --- |
| **gene name** | **HR** | **HR.95L** | **HR.95H** | **pvalue** |
| ZYX | 1.153 | 1.011 | 1.314 | 0.033 |
| ZNHIT1 | 1.733 | 1.072 | 2.801 | 0.025 |
| ZNF90 | 3.878 | 2.440 | 6.163 | 0.000 |
| ZNF706 | 0.660 | 0.467 | 0.933 | 0.019 |
| ZNF207 | 2.010 | 1.233 | 3.279 | 0.005 |
| ZFAND6 | 0.676 | 0.496 | 0.922 | 0.014 |
| ZC3H15 | 2.148 | 1.359 | 3.394 | 0.001 |
| ZBTB7A | 0.647 | 0.481 | 0.869 | 0.004 |
| YY1 | 1.804 | 1.081 | 3.012 | 0.024 |
| YWHAZ | 2.123 | 1.553 | 2.904 | 0.000 |
| YWHAQ | 1.735 | 1.153 | 2.611 | 0.008 |
| YWHAH | 1.341 | 1.092 | 1.647 | 0.005 |
| YWHAB | 1.572 | 1.062 | 2.328 | 0.024 |
| YBX3 | 1.109 | 1.009 | 1.219 | 0.032 |
| YBX1 | 3.079 | 2.005 | 4.730 | 0.000 |
| XRN2 | 1.824 | 1.098 | 3.030 | 0.020 |
| XRCC6 | 3.058 | 1.921 | 4.867 | 0.000 |
| XRCC5 | 2.362 | 1.540 | 3.621 | 0.000 |
| XAF1 | 0.810 | 0.700 | 0.938 | 0.005 |
| WNK1 | 1.371 | 1.002 | 1.875 | 0.048 |
| WIPF1 | 1.539 | 1.134 | 2.090 | 0.006 |
| WDR11 | 0.707 | 0.520 | 0.961 | 0.027 |
| WAS | 1.578 | 1.104 | 2.255 | 0.012 |
| WARS | 1.145 | 1.006 | 1.304 | 0.041 |
| WAC | 0.569 | 0.338 | 0.957 | 0.034 |
| VPS35 | 1.411 | 1.021 | 1.951 | 0.037 |
| VPS28 | 1.614 | 1.013 | 2.569 | 0.044 |
| VMP1 | 1.355 | 1.133 | 1.620 | 0.001 |
| VASP | 1.389 | 1.079 | 1.787 | 0.011 |
| VAMP2 | 0.620 | 0.458 | 0.839 | 0.002 |
| UTRN | 0.745 | 0.602 | 0.921 | 0.007 |
| USP8 | 0.567 | 0.330 | 0.975 | 0.040 |
| USP3 | 0.579 | 0.414 | 0.808 | 0.001 |
| UQCR10 | 1.596 | 1.120 | 2.276 | 0.010 |
| UPP1 | 1.241 | 1.013 | 1.520 | 0.037 |
| UNC93B1 | 0.603 | 0.492 | 0.740 | 0.000 |
| UBE2L3 | 2.327 | 1.443 | 3.753 | 0.001 |
| UBE2D1 | 1.724 | 1.244 | 2.387 | 0.001 |
| TXN | 1.505 | 1.176 | 1.927 | 0.001 |
| TWF2 | 1.377 | 1.020 | 1.860 | 0.037 |
| TUBA1B | 2.380 | 1.880 | 3.013 | 0.000 |
| TUBA1A | 1.259 | 1.114 | 1.423 | 0.000 |
| TRIM22 | 0.829 | 0.734 | 0.937 | 0.003 |
| TRAPPC1 | 1.552 | 1.156 | 2.085 | 0.003 |
| TRAM1 | 1.430 | 1.038 | 1.970 | 0.029 |
| TRAF3IP3 | 1.391 | 1.203 | 1.607 | 0.000 |
| TPT1 | 0.731 | 0.602 | 0.887 | 0.002 |
| TPPP3 | 1.761 | 1.041 | 2.981 | 0.035 |
| TPM3 | 1.998 | 1.572 | 2.539 | 0.000 |
| TPI1 | 1.923 | 1.387 | 2.667 | 0.000 |
| TNFSF10 | 0.815 | 0.717 | 0.926 | 0.002 |
| TNFRSF1B | 1.222 | 1.095 | 1.365 | 0.000 |
| TMSB4X | 1.096 | 1.023 | 1.175 | 0.009 |
| TMEM59 | 0.605 | 0.459 | 0.796 | 0.000 |
| TMEM219 | 0.436 | 0.297 | 0.641 | 0.000 |
| TMEM165 | 1.793 | 1.260 | 2.553 | 0.001 |
| TMCO1 | 1.266 | 1.006 | 1.594 | 0.044 |
| TMA7 | 1.542 | 1.029 | 2.312 | 0.036 |
| TM9SF2 | 0.730 | 0.553 | 0.962 | 0.026 |
| TIMP1 | 1.106 | 1.029 | 1.190 | 0.006 |
| TIMM8B | 1.493 | 1.204 | 1.851 | 0.000 |
| THRAP3 | 1.542 | 1.035 | 2.299 | 0.033 |
| TGOLN2 | 0.519 | 0.357 | 0.753 | 0.001 |
| TFRC | 1.373 | 1.064 | 1.772 | 0.015 |
| TCIRG1 | 0.666 | 0.531 | 0.834 | 0.000 |
| TCF7L2 | 0.511 | 0.344 | 0.758 | 0.001 |
| TCF25 | 0.619 | 0.454 | 0.845 | 0.002 |
| TBCB | 1.709 | 1.188 | 2.458 | 0.004 |
| TBC1D10C | 0.794 | 0.683 | 0.923 | 0.003 |
| TALDO1 | 1.401 | 1.022 | 1.919 | 0.036 |
| TAGLN2 | 1.410 | 1.263 | 1.575 | 0.000 |
| SYNGR2 | 1.320 | 1.070 | 1.630 | 0.010 |
| SYAP1 | 1.520 | 1.100 | 2.101 | 0.011 |
| SUPT4H1 | 1.587 | 1.088 | 2.315 | 0.017 |
| SUMO1 | 2.521 | 1.655 | 3.841 | 0.000 |
| SUB1 | 1.764 | 1.229 | 2.533 | 0.002 |
| STX7 | 0.701 | 0.508 | 0.967 | 0.030 |
| STX10 | 1.577 | 1.090 | 2.281 | 0.016 |
| STAT2 | 0.763 | 0.600 | 0.971 | 0.028 |
| SSR4 | 0.714 | 0.580 | 0.880 | 0.002 |
| SSR2 | 1.523 | 1.046 | 2.219 | 0.028 |
| SSR1 | 1.528 | 1.104 | 2.113 | 0.010 |
| SRSF4 | 1.596 | 1.051 | 2.423 | 0.028 |
| SRSF3 | 2.143 | 1.460 | 3.146 | 0.000 |
| SRSF1 | 1.617 | 1.144 | 2.287 | 0.007 |
| SRP9 | 1.848 | 1.331 | 2.566 | 0.000 |
| SRGN | 1.440 | 1.173 | 1.767 | 0.000 |
| SP100 | 0.606 | 0.433 | 0.848 | 0.004 |
| SOD1 | 2.414 | 1.723 | 3.382 | 0.000 |
| SNX6 | 1.553 | 1.155 | 2.089 | 0.004 |
| SNX5 | 1.610 | 1.151 | 2.253 | 0.005 |
| SNX17 | 0.588 | 0.358 | 0.966 | 0.036 |
| SNRPG | 2.669 | 1.939 | 3.675 | 0.000 |
| SNRPD3 | 2.571 | 1.745 | 3.788 | 0.000 |
| SNRPD2 | 1.430 | 1.037 | 1.972 | 0.029 |
| SNRPC | 3.572 | 2.346 | 5.440 | 0.000 |
| SNRPB2 | 2.287 | 1.534 | 3.408 | 0.000 |
| SNRPB | 3.226 | 2.333 | 4.460 | 0.000 |
| SMS | 1.399 | 1.054 | 1.857 | 0.020 |
| SMIM7 | 0.704 | 0.505 | 0.983 | 0.039 |
| SLIRP | 1.953 | 1.350 | 2.825 | 0.000 |
| SLC7A7 | 0.754 | 0.645 | 0.882 | 0.000 |
| SLC2A3 | 1.200 | 1.057 | 1.362 | 0.005 |
| SLC25A6 | 0.706 | 0.565 | 0.882 | 0.002 |
| SH3GLB1 | 0.647 | 0.453 | 0.922 | 0.016 |
| SH3BP5 | 0.821 | 0.687 | 0.980 | 0.029 |
| SH3BGRL3 | 1.490 | 1.117 | 1.986 | 0.007 |
| SH3BGRL | 1.472 | 1.065 | 2.033 | 0.019 |
| SFT2D2 | 1.375 | 1.057 | 1.789 | 0.018 |
| SFT2D1 | 0.718 | 0.538 | 0.959 | 0.025 |
| SF3B2 | 2.280 | 1.536 | 3.385 | 0.000 |
| SET | 1.947 | 1.321 | 2.868 | 0.001 |
| SERPINB6 | 0.864 | 0.763 | 0.977 | 0.020 |
| SERINC1 | 0.623 | 0.465 | 0.834 | 0.001 |
| SERBP1 | 1.754 | 1.294 | 2.377 | 0.000 |
| SEC62 | 0.629 | 0.474 | 0.836 | 0.001 |
| SEC61G | 1.950 | 1.412 | 2.695 | 0.000 |
| SDHC | 1.736 | 1.234 | 2.442 | 0.002 |
| SDHB | 2.914 | 1.817 | 4.675 | 0.000 |
| SCPEP1 | 1.239 | 1.043 | 1.471 | 0.014 |
| SCAND1 | 1.483 | 1.018 | 2.159 | 0.040 |
| SCAMP2 | 0.538 | 0.367 | 0.788 | 0.001 |
| SARAF | 0.732 | 0.567 | 0.945 | 0.017 |
| SAP18 | 1.585 | 1.092 | 2.302 | 0.015 |
| S100A9 | 1.069 | 1.007 | 1.135 | 0.029 |
| S100A8 | 1.076 | 1.011 | 1.145 | 0.021 |
| S100A12 | 1.087 | 1.016 | 1.162 | 0.015 |
| S100A10 | 1.125 | 1.012 | 1.251 | 0.029 |
| RPS8 | 0.751 | 0.579 | 0.973 | 0.030 |
| RPS4X | 0.714 | 0.560 | 0.909 | 0.006 |
| RPS28 | 0.745 | 0.602 | 0.921 | 0.006 |
| RPS27L | 0.615 | 0.434 | 0.870 | 0.006 |
| RPS2 | 0.837 | 0.714 | 0.982 | 0.029 |
| RPS15 | 0.784 | 0.632 | 0.972 | 0.026 |
| RPS14 | 0.725 | 0.586 | 0.896 | 0.003 |
| RPS11 | 0.705 | 0.558 | 0.891 | 0.003 |
| RPLP2 | 0.711 | 0.562 | 0.900 | 0.005 |
| RPLP1 | 0.745 | 0.599 | 0.928 | 0.009 |
| RPL6 | 0.706 | 0.527 | 0.945 | 0.019 |
| RPL37A | 0.695 | 0.522 | 0.926 | 0.013 |
| RPL34 | 0.766 | 0.606 | 0.968 | 0.026 |
| RPL3 | 0.694 | 0.552 | 0.873 | 0.002 |
| RPL27A | 0.776 | 0.619 | 0.973 | 0.028 |
| RPL18 | 0.719 | 0.582 | 0.887 | 0.002 |
| RPL14 | 0.767 | 0.603 | 0.975 | 0.030 |
| RPL12 | 0.773 | 0.612 | 0.977 | 0.031 |
| ROCK1 | 1.579 | 1.107 | 2.252 | 0.012 |
| RNPEP | 1.389 | 1.041 | 1.854 | 0.026 |
| RNF149 | 0.626 | 0.467 | 0.838 | 0.002 |
| RHOC | 1.441 | 1.251 | 1.658 | 0.000 |
| RGS18 | 1.160 | 1.023 | 1.315 | 0.021 |
| RGS10 | 1.164 | 1.027 | 1.320 | 0.018 |
| RETN | 1.163 | 1.015 | 1.332 | 0.029 |
| REEP5 | 0.441 | 0.312 | 0.622 | 0.000 |
| RCSD1 | 1.265 | 1.031 | 1.553 | 0.025 |
| RBX1 | 2.258 | 1.555 | 3.278 | 0.000 |
| RBM8A | 2.840 | 2.045 | 3.944 | 0.000 |
| RBM47 | 0.737 | 0.557 | 0.974 | 0.032 |
| RASSF5 | 1.399 | 1.098 | 1.782 | 0.007 |
| RASGRP2 | 1.318 | 1.103 | 1.576 | 0.002 |
| RAP2B | 1.426 | 1.172 | 1.734 | 0.000 |
| RAP1A | 1.451 | 1.114 | 1.891 | 0.006 |
| RAN | 2.556 | 1.807 | 3.616 | 0.000 |
| RAD23A | 1.560 | 1.002 | 2.431 | 0.049 |
| RAD21 | 2.980 | 2.164 | 4.105 | 0.000 |
| RAB7A | 1.759 | 1.089 | 2.841 | 0.021 |
| RAB5C | 1.584 | 1.058 | 2.373 | 0.026 |
| PTPN2 | 0.644 | 0.442 | 0.940 | 0.022 |
| PTPN18 | 1.157 | 1.007 | 1.330 | 0.040 |
| PTMA | 2.814 | 1.901 | 4.166 | 0.000 |
| PTGES3 | 2.244 | 1.489 | 3.382 | 0.000 |
| PSMG2 | 2.152 | 1.439 | 3.218 | 0.000 |
| PSMD4 | 2.095 | 1.575 | 2.787 | 0.000 |
| PSMC6 | 2.536 | 1.621 | 3.970 | 0.000 |
| PSMC3 | 1.880 | 1.261 | 2.803 | 0.002 |
| PSMB2 | 2.703 | 1.823 | 4.010 | 0.000 |
| PSMA7 | 2.220 | 1.503 | 3.278 | 0.000 |
| PSMA4 | 1.598 | 1.137 | 2.247 | 0.007 |
| PSMA3 | 2.338 | 1.595 | 3.427 | 0.000 |
| PSMA1 | 1.866 | 1.295 | 2.688 | 0.001 |
| PSAP | 0.520 | 0.404 | 0.669 | 0.000 |
| PRRC2C | 1.396 | 1.035 | 1.882 | 0.029 |
| PRR13 | 1.728 | 1.174 | 2.543 | 0.006 |
| PRPF38B | 0.679 | 0.468 | 0.985 | 0.041 |
| PRDX6 | 1.452 | 1.080 | 1.951 | 0.013 |
| PQLC3 | 0.699 | 0.551 | 0.888 | 0.003 |
| PPP4C | 2.785 | 1.771 | 4.381 | 0.000 |
| PPP2R1A | 2.389 | 1.404 | 4.065 | 0.001 |
| PPIA | 1.430 | 1.059 | 1.931 | 0.020 |
| POMP | 1.878 | 1.372 | 2.569 | 0.000 |
| POLR2K | 2.120 | 1.519 | 2.959 | 0.000 |
| POLR2G | 1.759 | 1.157 | 2.673 | 0.008 |
| POLR2B | 1.940 | 1.300 | 2.896 | 0.001 |
| PNISR | 0.728 | 0.564 | 0.939 | 0.015 |
| PLXNB2 | 0.865 | 0.748 | 1.000 | 0.050 |
| PLP2 | 1.272 | 1.018 | 1.590 | 0.035 |
| PLEC | 1.327 | 1.091 | 1.614 | 0.005 |
| PKN1 | 1.712 | 1.148 | 2.554 | 0.008 |
| PKM | 1.541 | 1.173 | 2.023 | 0.002 |
| PIAS1 | 0.651 | 0.455 | 0.930 | 0.018 |
| PGK1 | 2.121 | 1.441 | 3.121 | 0.000 |
| PGAM1 | 2.633 | 1.634 | 4.242 | 0.000 |
| PFN1 | 2.149 | 1.587 | 2.908 | 0.000 |
| PFDN5 | 0.643 | 0.449 | 0.921 | 0.016 |
| PFDN2 | 3.123 | 2.255 | 4.323 | 0.000 |
| PECAM1 | 0.673 | 0.604 | 0.749 | 0.000 |
| PDCD10 | 2.433 | 1.732 | 3.419 | 0.000 |
| PCGF5 | 0.609 | 0.463 | 0.801 | 0.000 |
| PCBP1 | 1.596 | 1.045 | 2.437 | 0.030 |
| PARP14 | 0.714 | 0.590 | 0.865 | 0.001 |
| PARK7 | 2.647 | 1.614 | 4.342 | 0.000 |
| PAPOLA | 1.580 | 1.029 | 2.425 | 0.037 |
| PAG1 | 0.840 | 0.724 | 0.974 | 0.021 |
| PABPC1 | 1.550 | 1.023 | 2.349 | 0.039 |
| PA2G4 | 3.051 | 2.056 | 4.529 | 0.000 |
| OST4 | 0.538 | 0.355 | 0.814 | 0.003 |
| OS9 | 0.405 | 0.280 | 0.587 | 0.000 |
| OAS3 | 0.832 | 0.704 | 0.983 | 0.030 |
| NUDT3 | 1.676 | 1.083 | 2.593 | 0.020 |
| NUDC | 2.677 | 1.709 | 4.195 | 0.000 |
| NR4A2 | 0.836 | 0.736 | 0.950 | 0.006 |
| NPC2 | 0.746 | 0.633 | 0.879 | 0.000 |
| NKG7 | 1.208 | 1.055 | 1.384 | 0.006 |
| NFE2L2 | 0.557 | 0.396 | 0.783 | 0.001 |
| NEDD8 | 2.172 | 1.353 | 3.488 | 0.001 |
| NDUFV2 | 1.685 | 1.260 | 2.252 | 0.000 |
| NDUFS6 | 1.739 | 1.236 | 2.447 | 0.001 |
| NDUFS2 | 1.605 | 1.168 | 2.205 | 0.003 |
| NDUFB3 | 1.440 | 1.067 | 1.942 | 0.017 |
| NDUFB1 | 1.559 | 1.085 | 2.240 | 0.016 |
| NDUFA13 | 1.692 | 1.155 | 2.478 | 0.007 |
| NDUFA12 | 1.739 | 1.128 | 2.682 | 0.012 |
| NCL | 2.466 | 1.630 | 3.731 | 0.000 |
| NARS | 1.476 | 1.047 | 2.083 | 0.026 |
| NAA38 | 1.378 | 1.046 | 1.815 | 0.023 |
| N4BP2L2 | 0.748 | 0.565 | 0.990 | 0.043 |
| MYO1F | 1.250 | 1.084 | 1.442 | 0.002 |
| MYL12A | 1.361 | 1.051 | 1.763 | 0.019 |
| MYH9 | 1.370 | 1.092 | 1.720 | 0.007 |
| MTPN | 1.710 | 1.215 | 2.407 | 0.002 |
| MTHFD2 | 1.487 | 1.212 | 1.824 | 0.000 |
| MT2A | 1.118 | 1.001 | 1.247 | 0.047 |
| MSRB1 | 1.534 | 1.240 | 1.897 | 0.000 |
| MSN | 1.856 | 1.437 | 2.397 | 0.000 |
| MRPL57 | 1.528 | 1.077 | 2.166 | 0.017 |
| MRPL52 | 1.700 | 1.197 | 2.416 | 0.003 |
| MRPL23 | 1.364 | 1.028 | 1.810 | 0.031 |
| MNDA | 1.109 | 1.006 | 1.221 | 0.037 |
| MINOS1 | 2.225 | 1.407 | 3.517 | 0.001 |
| MGAT1 | 0.511 | 0.366 | 0.714 | 0.000 |
| MEAF6 | 1.738 | 1.150 | 2.627 | 0.009 |
| MDH2 | 1.700 | 1.147 | 2.521 | 0.008 |
| MCEMP1 | 1.271 | 1.060 | 1.525 | 0.010 |
| MAPKAPK3 | 0.615 | 0.416 | 0.907 | 0.014 |
| MAP3K1 | 0.715 | 0.547 | 0.935 | 0.014 |
| MALAT1 | 0.742 | 0.631 | 0.871 | 0.000 |
| LYN | 1.398 | 1.078 | 1.814 | 0.011 |
| LY86 | 0.841 | 0.745 | 0.950 | 0.005 |
| LTA4H | 0.689 | 0.488 | 0.972 | 0.034 |
| LSM8 | 1.659 | 1.014 | 2.715 | 0.044 |
| LSM5 | 1.657 | 1.163 | 2.361 | 0.005 |
| LRPAP1 | 0.699 | 0.515 | 0.947 | 0.021 |
| LRP1 | 0.780 | 0.647 | 0.940 | 0.009 |
| LGALS3 | 1.388 | 1.189 | 1.620 | 0.000 |
| LDHA | 1.782 | 1.429 | 2.220 | 0.000 |
| LCP2 | 1.254 | 1.109 | 1.418 | 0.000 |
| LCP1 | 1.206 | 1.114 | 1.305 | 0.000 |
| LARP7 | 1.725 | 1.122 | 2.652 | 0.013 |
| LAPTM4A | 0.652 | 0.478 | 0.891 | 0.007 |
| LAMTOR2 | 1.548 | 1.160 | 2.067 | 0.003 |
| KYNU | 1.894 | 1.099 | 3.263 | 0.021 |
| KPNB1 | 2.216 | 1.507 | 3.259 | 0.000 |
| KCTD12 | 1.165 | 1.021 | 1.329 | 0.023 |
| JUNB | 0.802 | 0.696 | 0.923 | 0.002 |
| JUN | 0.803 | 0.712 | 0.906 | 0.000 |
| JAK1 | 0.744 | 0.561 | 0.986 | 0.040 |
| ITM2B | 0.692 | 0.584 | 0.820 | 0.000 |
| IQGAP1 | 1.502 | 1.024 | 2.204 | 0.038 |
| IL32 | 1.427 | 1.271 | 1.602 | 0.000 |
| IL16 | 0.714 | 0.603 | 0.845 | 0.000 |
| IFNGR1 | 0.759 | 0.635 | 0.908 | 0.003 |
| IFI16 | 1.320 | 1.057 | 1.648 | 0.014 |
| ICAM3 | 0.693 | 0.579 | 0.829 | 0.000 |
| ICAM2 | 0.635 | 0.488 | 0.827 | 0.001 |
| HSPE1 | 1.519 | 1.130 | 2.042 | 0.006 |
| HSPA5 | 1.247 | 1.023 | 1.519 | 0.029 |
| HSP90AB1 | 1.880 | 1.324 | 2.671 | 0.000 |
| HSP90AA1 | 1.707 | 1.398 | 2.084 | 0.000 |
| HSBP1 | 1.537 | 1.105 | 2.140 | 0.011 |
| HNRNPU | 2.061 | 1.454 | 2.921 | 0.000 |
| HNRNPR | 4.089 | 2.636 | 6.343 | 0.000 |
| HNRNPM | 2.070 | 1.310 | 3.273 | 0.002 |
| HNRNPK | 7.407 | 3.850 | 14.250 | 0.000 |
| HNRNPH1 | 0.689 | 0.508 | 0.936 | 0.017 |
| HNRNPF | 2.291 | 1.547 | 3.393 | 0.000 |
| HNRNPC | 3.278 | 2.116 | 5.077 | 0.000 |
| HNRNPA3 | 1.584 | 1.012 | 2.482 | 0.044 |
| HNRNPA2B1 | 1.801 | 1.141 | 2.841 | 0.011 |
| HMGN2 | 2.137 | 1.540 | 2.967 | 0.000 |
| HMGN1 | 1.611 | 1.159 | 2.240 | 0.005 |
| HMGB2 | 2.008 | 1.614 | 2.498 | 0.000 |
| HIGD2A | 0.704 | 0.545 | 0.908 | 0.007 |
| HERPUD1 | 0.717 | 0.582 | 0.882 | 0.002 |
| HCLS1 | 1.641 | 1.143 | 2.356 | 0.007 |
| HBEGF | 1.297 | 1.127 | 1.492 | 0.000 |
| HBD | 1.220 | 1.107 | 1.344 | 0.000 |
| H3F3A | 1.904 | 1.470 | 2.465 | 0.000 |
| H2AFZ | 2.351 | 1.743 | 3.171 | 0.000 |
| H2AFY | 1.547 | 1.062 | 2.254 | 0.023 |
| GUK1 | 1.765 | 1.207 | 2.581 | 0.003 |
| GSTK1 | 0.656 | 0.441 | 0.976 | 0.038 |
| GRN | 0.778 | 0.663 | 0.913 | 0.002 |
| GPX4 | 0.695 | 0.532 | 0.908 | 0.008 |
| GPX1 | 0.863 | 0.746 | 0.998 | 0.047 |
| GNLY | 1.373 | 1.148 | 1.642 | 0.001 |
| GNB2 | 1.427 | 1.004 | 2.027 | 0.047 |
| GNAQ | 1.278 | 1.094 | 1.493 | 0.002 |
| GMFG | 1.286 | 1.035 | 1.597 | 0.023 |
| GLRX | 0.782 | 0.669 | 0.913 | 0.002 |
| GLIPR2 | 1.596 | 1.345 | 1.894 | 0.000 |
| GIT2 | 0.613 | 0.402 | 0.936 | 0.024 |
| GHITM | 1.670 | 1.117 | 2.498 | 0.013 |
| GCA | 1.333 | 1.081 | 1.643 | 0.007 |
| GAPDH | 1.373 | 1.053 | 1.789 | 0.019 |
| GADD45GIP1 | 1.488 | 1.071 | 2.069 | 0.018 |
| GABARAPL1 | 0.766 | 0.659 | 0.891 | 0.001 |
| GABARAP | 0.467 | 0.324 | 0.674 | 0.000 |
| FXYD5 | 0.811 | 0.669 | 0.984 | 0.033 |
| FUS | 1.862 | 1.302 | 2.662 | 0.001 |
| FPR1 | 1.166 | 1.045 | 1.301 | 0.006 |
| FOSB | 0.843 | 0.758 | 0.937 | 0.002 |
| FLNA | 1.325 | 1.195 | 1.469 | 0.000 |
| FKBP2 | 0.753 | 0.586 | 0.967 | 0.026 |
| FKBP1A | 2.468 | 1.735 | 3.512 | 0.000 |
| FGR | 1.218 | 1.090 | 1.361 | 0.001 |
| FGD2 | 0.680 | 0.573 | 0.807 | 0.000 |
| FCGRT | 0.800 | 0.690 | 0.928 | 0.003 |
| FAU | 0.730 | 0.543 | 0.981 | 0.037 |
| FAM96A | 0.695 | 0.508 | 0.952 | 0.023 |
| FAM49B | 3.086 | 2.289 | 4.162 | 0.000 |
| FAM110A | 1.673 | 1.221 | 2.292 | 0.001 |
| ERP29 | 0.538 | 0.388 | 0.747 | 0.000 |
| ERH | 3.805 | 2.525 | 5.735 | 0.000 |
| EREG | 1.157 | 1.016 | 1.318 | 0.028 |
| ERCC1 | 0.654 | 0.458 | 0.932 | 0.019 |
| EPN1 | 0.516 | 0.341 | 0.780 | 0.002 |
| ENY2 | 5.341 | 3.398 | 8.393 | 0.000 |
| ENSA | 1.792 | 1.330 | 2.414 | 0.000 |
| ENO1 | 2.416 | 1.889 | 3.091 | 0.000 |
| EMP3 | 1.235 | 1.069 | 1.428 | 0.004 |
| EIF6 | 2.338 | 1.612 | 3.391 | 0.000 |
| EIF5B | 1.577 | 1.039 | 2.392 | 0.032 |
| EIF5A | 1.790 | 1.238 | 2.588 | 0.002 |
| EIF4EBP1 | 1.486 | 1.283 | 1.722 | 0.000 |
| EIF4E2 | 2.543 | 1.317 | 4.910 | 0.005 |
| EIF4A2 | 0.501 | 0.359 | 0.699 | 0.000 |
| EIF3K | 0.596 | 0.445 | 0.798 | 0.001 |
| EIF3G | 0.670 | 0.479 | 0.935 | 0.019 |
| EHBP1L1 | 1.388 | 1.026 | 1.876 | 0.033 |
| EFHD2 | 1.270 | 1.063 | 1.516 | 0.008 |
| EEF2 | 0.709 | 0.579 | 0.869 | 0.001 |
| EEF1A1 | 0.633 | 0.489 | 0.819 | 0.000 |
| EDF1 | 0.718 | 0.530 | 0.974 | 0.033 |
| EAPP | 1.590 | 1.068 | 2.367 | 0.022 |
| DYNLT1 | 0.768 | 0.598 | 0.986 | 0.039 |
| DYNLRB1 | 0.666 | 0.473 | 0.940 | 0.021 |
| DPYSL2 | 1.308 | 1.133 | 1.509 | 0.000 |
| DPP7 | 0.792 | 0.682 | 0.921 | 0.002 |
| DOCK8 | 0.710 | 0.556 | 0.907 | 0.006 |
| DNAJC8 | 3.826 | 2.390 | 6.125 | 0.000 |
| DEK | 1.181 | 1.028 | 1.357 | 0.019 |
| DEDD2 | 0.618 | 0.434 | 0.880 | 0.008 |
| DECR1 | 1.497 | 1.112 | 2.015 | 0.008 |
| DDX5 | 0.558 | 0.434 | 0.716 | 0.000 |
| DDX17 | 0.810 | 0.666 | 0.986 | 0.035 |
| DAD1 | 1.387 | 1.009 | 1.908 | 0.044 |
| CYLD | 0.768 | 0.606 | 0.975 | 0.030 |
| CYCS | 1.556 | 1.170 | 2.070 | 0.002 |
| CYC1 | 3.057 | 2.042 | 4.578 | 0.000 |
| CYBA | 0.725 | 0.587 | 0.895 | 0.003 |
| CUX1 | 0.528 | 0.356 | 0.783 | 0.001 |
| CTSZ | 0.736 | 0.601 | 0.901 | 0.003 |
| CTSS | 0.693 | 0.538 | 0.893 | 0.005 |
| CSTA | 1.193 | 1.026 | 1.388 | 0.022 |
| CSDE1 | 0.543 | 0.403 | 0.732 | 0.000 |
| CRIP1 | 1.214 | 1.089 | 1.353 | 0.000 |
| CREBRF | 0.687 | 0.515 | 0.917 | 0.011 |
| COX8A | 1.749 | 1.180 | 2.591 | 0.005 |
| COX7B | 1.793 | 1.326 | 2.426 | 0.000 |
| COX7A2 | 1.408 | 1.043 | 1.900 | 0.025 |
| COX6C | 2.141 | 1.600 | 2.864 | 0.000 |
| COX5B | 1.501 | 1.006 | 2.240 | 0.047 |
| COX4I1 | 0.722 | 0.531 | 0.983 | 0.038 |
| COX14 | 1.522 | 1.024 | 2.265 | 0.038 |
| CORO1B | 0.664 | 0.528 | 0.835 | 0.000 |
| CORO1A | 1.392 | 1.189 | 1.631 | 0.000 |
| COPS6 | 1.826 | 1.135 | 2.939 | 0.013 |
| COPE | 1.758 | 1.194 | 2.590 | 0.004 |
| CMTM6 | 1.460 | 1.094 | 1.948 | 0.010 |
| CLTC | 1.523 | 1.107 | 2.094 | 0.010 |
| CLEC7A | 1.242 | 1.131 | 1.363 | 0.000 |
| CLEC4E | 1.289 | 1.090 | 1.524 | 0.003 |
| CLEC4A | 0.694 | 0.510 | 0.944 | 0.020 |
| CKLF | 1.518 | 1.216 | 1.896 | 0.000 |
| CIRBP | 0.539 | 0.401 | 0.725 | 0.000 |
| CHCHD2 | 2.371 | 1.657 | 3.393 | 0.000 |
| CFL1 | 2.505 | 1.736 | 3.615 | 0.000 |
| CEBPD | 1.140 | 1.013 | 1.283 | 0.030 |
| CDKN2D | 1.323 | 1.122 | 1.559 | 0.001 |
| CDKN1A | 0.817 | 0.687 | 0.971 | 0.022 |
| CDC42SE2 | 0.723 | 0.548 | 0.954 | 0.022 |
| CDC42SE1 | 1.493 | 1.201 | 1.857 | 0.000 |
| CDC42 | 2.251 | 1.628 | 3.111 | 0.000 |
| CDA | 1.141 | 1.009 | 1.291 | 0.036 |
| CD74 | 0.811 | 0.721 | 0.911 | 0.000 |
| CD44 | 1.150 | 1.061 | 1.246 | 0.001 |
| CD36 | 1.256 | 1.020 | 1.548 | 0.032 |
| CCNDBP1 | 0.543 | 0.362 | 0.817 | 0.003 |
| CCDC12 | 1.903 | 1.181 | 3.067 | 0.008 |
| CBX3 | 3.052 | 2.045 | 4.555 | 0.000 |
| CAST | 0.581 | 0.426 | 0.791 | 0.001 |
| CASP8 | 1.418 | 1.031 | 1.951 | 0.032 |
| CAPZB | 2.171 | 1.536 | 3.068 | 0.000 |
| CAPZA2 | 2.197 | 1.482 | 3.255 | 0.000 |
| CAPN2 | 1.236 | 1.047 | 1.460 | 0.012 |
| C9orf72 | 0.623 | 0.439 | 0.885 | 0.008 |
| C7orf50 | 0.680 | 0.521 | 0.887 | 0.004 |
| C6orf62 | 1.502 | 1.068 | 2.112 | 0.019 |
| C3AR1 | 1.168 | 1.016 | 1.342 | 0.029 |
| C15orf39 | 0.772 | 0.629 | 0.947 | 0.013 |
| BZW1 | 1.998 | 1.399 | 2.855 | 0.000 |
| BUD31 | 2.824 | 1.804 | 4.420 | 0.000 |
| BTG2 | 0.815 | 0.691 | 0.960 | 0.015 |
| BLVRA | 1.302 | 1.123 | 1.508 | 0.000 |
| BLOC1S2 | 1.842 | 1.260 | 2.694 | 0.002 |
| BLOC1S1 | 1.791 | 1.241 | 2.584 | 0.002 |
| BCL6 | 1.178 | 1.013 | 1.370 | 0.034 |
| BAZ1A | 1.619 | 1.172 | 2.237 | 0.003 |
| BAX | 1.435 | 1.001 | 2.057 | 0.049 |
| BATF3 | 1.449 | 1.203 | 1.745 | 0.000 |
| BANF1 | 1.512 | 1.142 | 2.002 | 0.004 |
| AURKAIP1 | 1.876 | 1.166 | 3.020 | 0.010 |
| ATP6V1F | 1.539 | 1.098 | 2.157 | 0.012 |
| ATP6V1B2 | 1.492 | 1.074 | 2.071 | 0.017 |
| ATP6V0E1 | 0.693 | 0.533 | 0.903 | 0.007 |
| ATP6AP2 | 1.872 | 1.342 | 2.612 | 0.000 |
| ATP1A1 | 1.316 | 1.009 | 1.717 | 0.042 |
| ATM | 0.592 | 0.456 | 0.767 | 0.000 |
| ATF4 | 0.682 | 0.493 | 0.943 | 0.021 |
| ASNA1 | 2.445 | 1.629 | 3.671 | 0.000 |
| ARPC5 | 1.582 | 1.262 | 1.982 | 0.000 |
| ARPC2 | 1.812 | 1.236 | 2.655 | 0.002 |
| ARPC1B | 1.411 | 1.128 | 1.763 | 0.003 |
| ARL6IP1 | 1.816 | 1.394 | 2.367 | 0.000 |
| ARHGEF1 | 1.750 | 1.253 | 2.443 | 0.001 |
| ARHGAP30 | 1.804 | 1.431 | 2.274 | 0.000 |
| ARF6 | 1.620 | 1.220 | 2.151 | 0.001 |
| ARF5 | 1.907 | 1.348 | 2.698 | 0.000 |
| ARF3 | 1.655 | 1.198 | 2.285 | 0.002 |
| ARF1 | 1.740 | 1.230 | 2.463 | 0.002 |
| AP2S1 | 1.456 | 1.039 | 2.042 | 0.029 |
| AP2M1 | 2.083 | 1.351 | 3.213 | 0.001 |
| AP1S2 | 1.299 | 1.116 | 1.511 | 0.001 |
| ANXA2 | 1.339 | 1.095 | 1.636 | 0.004 |
| ANXA11 | 1.300 | 1.053 | 1.604 | 0.015 |
| ANXA1 | 1.144 | 1.072 | 1.222 | 0.000 |
| ANP32A | 1.651 | 1.182 | 2.306 | 0.003 |
| ANAPC11 | 2.371 | 1.555 | 3.614 | 0.000 |
| ALOX5AP | 1.119 | 1.024 | 1.224 | 0.013 |
| ALDOA | 1.562 | 1.051 | 2.323 | 0.028 |
| AKNA | 1.320 | 1.120 | 1.556 | 0.001 |
| AIP | 0.655 | 0.477 | 0.901 | 0.009 |
| AHR | 1.219 | 1.076 | 1.381 | 0.002 |
| AES | 0.740 | 0.553 | 0.990 | 0.042 |
| ADRM1 | 1.678 | 1.135 | 2.480 | 0.009 |
| ADPGK | 0.605 | 0.399 | 0.917 | 0.018 |
| ADCY7 | 0.755 | 0.571 | 1.000 | 0.050 |
| ACTR3 | 1.899 | 1.278 | 2.821 | 0.001 |
| ACTR2 | 1.980 | 1.343 | 2.919 | 0.001 |
| ACSL1 | 1.236 | 1.088 | 1.404 | 0.001 |
| ACAA1 | 0.519 | 0.320 | 0.842 | 0.008 |
| ABTB1 | 0.715 | 0.528 | 0.968 | 0.030 |

| **S9 Table.** The 18 monocyte-related prognostic signature gene. | | | | | |
| --- | --- | --- | --- | --- | --- |
| **gene** | **coef** | **exp(coef)** | **se(coef)** | **z** | **p** |
| PECAM1 | -0.104181 | 0.901062 | 0.088515 | -1.177 | 0.2392 |
| PFDN2 | 0.058209 | 1.059937 | 0.116068 | 0.502 | 0.61601 |
| TUBA1B | 0.220625 | 1.246855 | 0.11404 | 1.935 | 0.05304 |
| ERH | 0.178758 | 1.195731 | 0.116883 | 1.529 | 0.12617 |
| ENY2 | -0.0101 | 0.98995 | 0.131476 | -0.077 | 0.93876 |
| FAM49B | 0.048342 | 1.049529 | 0.120563 | 0.401 | 0.68845 |
| HNRNPR | 0.125304 | 1.133493 | 0.104572 | 1.198 | 0.23082 |
| PSAP | -0.208644 | 0.811684 | 0.095714 | -2.18 | 0.02927 |
| RHOC | 0.122368 | 1.13017 | 0.102108 | 1.198 | 0.23075 |
| ANAPC11 | 0.269752 | 1.309639 | 0.10594 | 2.546 | 0.01089 |
| IL32 | 0.036949 | 1.03764 | 0.060651 | 0.609 | 0.54239 |
| SNRPC | -0.008621 | 0.991416 | 0.126733 | -0.068 | 0.94576 |
| GLIPR2 | 0.152278 | 1.164484 | 0.096854 | 1.572 | 0.11589 |
| ZNF90 | 0.072381 | 1.075065 | 0.060958 | 1.187 | 0.23507 |
| IL16 | -0.209926 | 0.810644 | 0.099788 | -2.104 | 0.0354 |
| YWHAZ | 0.140219 | 1.150525 | 0.110714 | 1.266 | 0.20534 |
| PCGF5 | -0.131932 | 0.8764 | 0.09305 | -1.418 | 0.15623 |
| ERP29 | -0.262834 | 0.768869 | 0.092005 | -2.857 | 0.00428 |

| **S10 Table.** Univariate cox regression results for GSE136337 cohort. | | | | | |
| --- | --- | --- | --- | --- | --- |
| **index** | **coef** | **exp(coef)** | **se(coef)** | **z** | **p** |
| age | 0.042408 | 1.043321 | 0.009198 | 4.611 | 4.02E-06 |
| gender | -0.2385 | 0.7878 | 0.1506 | -1.583 | 1.13E-01 |
| albumin | -0.3774 | 0.6856 | 0.1095 | -3.448 | 5.65E-04 |
| β2m | 0.07565 | 1.07858 | 0.01183 | 6.393 | 1.63E-10 |
| ldh | 0.00221 | 1.002212 | 0.000834 | 2.65 | 8.06E-03 |
| ISS | 0.50135 | 1.65095 | 0.09263 | 5.413 | 6.21E-08 |
| plasma_cell % | 0.00715 | 1.007176 | 0.004168 | 1.715 | 8.63E-02 |
| risk score | 1.1943 | 3.3011 | 0.1931 | 6.185 | 6.20E-10 |
